# Supplementary material for: Treatment Patterns and Survival among Adult Patients with Advanced Soft Tissue Sarcoma: A Retrospective Medical Record Review in the United Kingdom, Spain, Germany, and France
Source: Sarcoma. 2018 May 24;2018:5467057. doi: 10.1155/2018/5467057 (PMC5994280; doi:10.1155/2018/5467057)
Supplement: Supplementary 2 — Supplementary Appendix B: provides detailed information on patient characteristics and treatment patterns, overall, and by country. [file 5467057.f2.xlsx]

## Sheet: Characteristics (Overall)
Table B-1. Characteristics of Patients with a Diagnosis of Advanced Soft Tissue Sarcoma: Overall Sample
Characteristic	Total		Leiomyosarcomas		Others / NOS		Fibroblastic/Myofibroblastic		Liposarcomas		Vascular sarcomas		Rhabdomyosarcomas		Synovial sarcoma
	N	%	N	%	N	%	N	%	N	%	N	%	N	%	N	%
	807	100	229	100	183	100	78	100	105	100	79	100	86	100	47	100
Histological Subtype classification
Leiomyosarcomas	229	28.3767	---	---	---	---	---	---	---	---	---	---	---	---	---	---
Others / NOS	183	22.6766	---	---	---	---	---	---	---	---	---	---	---	---	---	---
Fibroblastic/Myofibroblastic	78	9.66543	---	---	---	---	---	---	---	---	---	---	---	---	---	---
Liposarcomas	105	13.0112	---	---	---	---	---	---	---	---	---	---	---	---	---	---
Vascular sarcomas	79	9.78934	---	---	---	---	---	---	---	---	---	---	---	---	---	---
Rhabdomyosarcomas	86	10.6568	---	---	---	---	---	---	---	---	---	---	---	---	---	---
Synovial sarcoma	47	5.82404	---	---	---	---	---	---	---	---	---	---	---	---	---	---
Sex
Male	475	58.86	91	39.74	125	68.31	54	69.23	71	67.62	46	58.23	56	65.12	32	86.67
Female	332	41.14	138	60.26	58	31.69	24	30.77	34	32.38	33	41.77	30	34.88	15	13.33
Ethnic Origin
White/Caucasian	562	92.74	160	93.02	112	94.92	56	90.32	75	93.75	52	89.66	68	91.89	39	93.33
African/black	14	2.31	5	2.91	2	1.69	3	4.84	2	2.5	0	0	1	1.35	1	6.67
Asian or Pacific Islander	14	2.31	4	2.33	2	1.69	1	1.61	2	2.5	3	5.17	1	1.35	1	0
Middle Eastern	8	1.32	1	0.58	0	0	1	1.61	1	1.25	2	3.45	2	2.7	1	0
Indian Subcontinent	8	1.32	2	1.16	2	1.69	1	1.61	0	0	1	1.72	2	2.7	0	0
Supplemental private insurance
Yes	128	15.86	41	17.9	40	21.86	10	12.82	11	10.48	10	12.66	12	13.95	4	0
No	578	71.62	160	69.87	121	66.12	55	70.51	82	78.1	57	72.15	62	72.09	41	100
Don't know	101	12.52	28	12.23	22	12.02	13	16.67	12	11.43	12	15.19	12	13.95	2	0
Stage of disease at initial diagnosis
1A	1	0.12	0	0	0	0	1	1.28	0	0	0	0	0	0	0	0
1B	20	2.48	8	3.49	1	0.55	4	5.13	1	0.95	2	2.53	4	4.65	0	0
IIA	37	4.58	10	4.37	13	7.1	1	1.28	7	6.67	3	3.8	3	3.49	0	0
IIB	87	10.78	28	12.23	23	12.57	7	8.97	10	9.52	9	11.39	3	3.49	7	0
III (with no regional lymph node metastasis)	44	5.45	10	4.37	5	2.73	7	8.97	11	10.48	5	6.33	3	3.49	3	13.33
III (with regional lymph node metastasis)	61	7.56	21	9.17	16	8.74	6	7.69	9	8.57	5	6.33	3	3.49	1	6.67
IV	557	69.02	152	66.38	125	68.31	52	66.67	67	63.81	55	69.62	70	81.4	36	80
Histological subtype
Adipoctic tumors	105	13.01	0	0	0	0	0	0	105	100	0	0	0	0	0	0
Angiosarcoma	72	8.92	0	0	0	0	0	0	0	0	72	91.14	0	0	0	0
Chondro-osssesous tumors	13	1.61	0	0	13	7.1	0	0	0	0	0	0	0	0	0	0
Fibroblastic/myofibroblastic tumor	78	9.67	0	0	0	0	78	100	0	0	0	0	0	0	0	0
Fibrohystiocytic tumor	26	3.22	0	0	26	14.21	0	0	0	0	0	0	0	0	0	0
Seketal muscle tumor	86	10.66	0	0	0	0	0	0	0	0	0	0	86	100	0	0
Smooth muscle tumor	144	17.84	144	62.88	0	0	0	0	0	0	0	0	0	0	0	0
Pericytic (perivascular) tumor	1	0.12	0	0	1	0.55	0	0	0	0	0	0	0	0	0	0
Vascular tumor of the soft tissue	7	0.87	0	0	0	0	0	0	0	0	7	8.86	0	0	0	0
Nerve sheath tumor	14	1.73	0	0	14	7.65	0	0	0	0	0	0	0	0	0	0
Synovial sarcoma	47	5.82	0	0	0	0	0	0	0	0	0	0	0	0	47	100
Tumor of uncertian differentiation	34	4.21	0	0	34	18.58	0	0	0	0	0	0	0	0	0	0
Uterine leiomyosarcoma	85	10.53	85	37.12	0	0	0	0	0	0	0	0	0	0	0	0
undifferentiated/unclassified sarcoma	93	11.52	0	0	93	50.82	0	0	0	0	0	0	0	0	0	0
Don't know	2	0.25	0	0	2	1.09	0	0	0	0	0	0	0	0	0	0
Number of patients where initial diagnosis was not advanced staged	188	23.2962	60	26.2009	44	24.0437	18	23.0769	27	25.7143	18	22.7848	13	15.1163	8	17.0213
Treatment received during time from initial diagnosis to diagnosis of advanced stage (among patients with initially non-advanced stage disease)
Neoadjuvant therapy	11	8.21	2	4.55	3	8.57	0	0	1	5.56	2	15.38	3	37.5	0	0
Adjuvant therapy	15	11.19	5	11.36	3	8.57	0	0	3	16.67	2	15.38	2	25	0	0
Radiotherapy	55	41.04	19	43.18	18	51.43	3	25	5	27.78	4	30.77	6	75	0	0
Surgery	111	82.84	39	88.64	27	77.14	10	83.33	14	77.78	11	84.62	7	87.5	3	0
Received radiation to the mediastinal/pericardial area	0	0	0	0	0	0	0	0	0	0	0	0	0	0	0	0
Time from initial diagnosis to advanced diagnosis (months)	188	23.2962	60	26.2009	44	24.0437	18	23.0769	27	25.7143	18	22.7848	13	15.1163	8	17.0213
Mean (SD)	23.06	20.57	22.16	20.35	28.42	25.29	20.11	14.45	21.65	18.76	19.71	17.77	18.28	12.74	26.98	---
Median	15.22		16.02		18.03		18.02		16.47		12.02		16.1		13.88	---
IQR (Q1, Q3)	7.78	33.83	6.95	33.42	8.22	41.15	7.03	33.9	7.2	31	7.97	26.6	10.23	28.97	9.47	---
Range (minimum, maximum)	0.1	98.93	0.2	93.83	0.2	98.93	0.1	42.63	0.27	67.4	1.1	66.2	0.47	41.33	6.97	---
Age at advanced diagnosis
Mean (SD)	57.1	12.3	57.86	11.26	56.63	13.36	55.82	11.54	57.27	12.31	58.72	13.25	57.67	12.07	53.23	9.94
Median	58		59		59		56		58		57		58		53
IQR (Q1, Q3)	50	67	50	67	47	67	48	65	51	67	51	68	51	67	46	58
Range (minimum, maximum)	21	90	21	85	22	83	21	75	22	84	24	90	23	78	22	74
Distribution
18-24	12	1.49	2	0.87	4	2.19	1	1.28	1	0.95	2	2.53	1	1.16	1	0
25-34	26	3.22	4	1.75	7	3.83	2	2.56	3	2.86	2	2.53	5	5.81	3	0
35-44	88	10.9	22	9.61	26	14.21	10	12.82	14	13.33	6	7.59	7	8.14	3	6.67
45-54	193	23.92	59	25.76	33	18.03	23	29.49	24	22.86	18	22.78	18	20.93	18	46.67
55-64	231	28.62	72	31.44	51	27.87	22	28.21	28	26.67	22	27.85	25	29.07	11	26.67
65-69	127	15.7373	33	14.4105	33	18.0328	9	11.5385	19	18.0952	12	15.1899	16	18.6047	5	10.6383
70-74	93	11.5242	28	12.2271	19	10.3825	9	11.5385	12	11.4286	8	10.1266	11	12.7907	6	12.766
75+	37	4.58	9	3.93	10	5.46	2	2.56	4	3.81	9	11.39	3	3.49	0	0
Facility where treatment was received for advanced STS
Cancer center	5	2.46	0	0	2	5.71	0	0	3	6.82	0	0	0	0	0	0
Academic/teaching hospital	177	87.19	39	86.67	28	80	17	94.44	38	86.36	21	84	18	90	16	100
Other public non-teaching hospital	11	5.42	3	6.67	4	11.43	0	0	1	2.27	1	4	2	10	0	0
Private hospital or clinic	0	0	0	0	0	0	0	0	0	0	0	0	0	0	0	0
Military hospital	0	0	0	0	0	0	0	0	0	0	0	0	0	0	0	0
Other	10	4.93	3	6.67	1	2.86	1	5.56	2	4.55	3	12	0	0	0	0
Weight in Kg at time of advanced diagnosis (known weight information)	631	100	173	100	144	100	63	100	82	100	63	100	67	100	39	100
Mean (SD)	70.93	10.99	68.59	9.87	71.09	11.93	71.63	10.16	72.56	12.35	74.34	12.84	69.82	8.18	72.64	9.65
Median	70		69		70		69		72		72		70		73
IQR (Q1, Q3)	64	78	62	75	64	78	65	77	64	80	65	82	65	76	65	80
Range (minimum, maximum)	45	116	48	95	45	116	55	110	48	113.8	48	110	52	90	53	102
Body surface area at time of advanced diagnosis (known BSA information)	629	100	172	100	143	100	63	100	82	100	63	100	67	100	39	100
Mean (SD)	1.83	0.17	1.79	0.16	1.83	0.18	1.84	0.15	1.86	0.18	1.87	0.19	1.82	0.13	1.86	0.15
Median	1.83		1.79		1.84		1.82		1.86		1.84		1.83		1.87
IQR (Q1, Q3)	1.72	1.94	1.67	1.91	1.74	1.95	1.75	1.92	1.73	1.97	1.73	2	1.73	1.92	1.74	1.95
Range (minimum, maximum)	1.41	2.46	1.41	2.18	1.41	2.46	1.57	2.28	1.47	2.42	1.52	2.35	1.47	2.12	1.56	2.3
Charlson Comorbidity Index (CCI) score at time of diagnosis of advanced STSb
Mean (SD)	0.95	1.07	0.92	1.09	0.84	1.04	0.82	0.95	1.09	0.99	1.14	1.21	1.07	1.17	1	1
Median	1		1		1		1		1		1		1		1
IQR (Q1, Q3)	0	2	0	1	0	1	0	2	0	2	0	2	0	2	0	2
Range (minimum, maximum)	0	6	0	5	0	6	0	4	0	4	0	4	0	6	0	3
Distribution
0	346	42.87	100	43.67	90	49.18	38	48.72	34	32.38	31	39.24	35	40.7	18	38.3
1	250	30.98	80	34.93	49	26.78	20	25.64	39	37.14	23	29.11	23	26.74	16	34.04
2	142	17.6	29	12.66	34	18.58	17	21.79	23	21.9	12	15.19	19	22.09	8	17.02
3+	69	8.55	20	8.73	10	5.46	3	3.85	9	8.57	13	16.46	9	10.47	5	10.64
CCI conditions at time of diagnosis of advanced STSb
Cerebrovascular disease	23	2.85	10	4.37	4	2.19	2	2.56	2	1.9	3	3.8	2	2.33	0	0
Chronic pulmonary disease	54	6.69	8	3.49	11	6.01	4	5.13	17	16.19	7	8.86	6	6.98	1	2.13
Congestive heart failure	19	2.35	7	3.06	1	0.55	1	1.28	2	1.9	3	3.8	4	4.65	1	2.13
Dementia	5	0.62	1	0.44	1	0.55	1	1.28	2	1.9	0	0	0	0	0	0
Depression	104	12.89	35	15.28	18	9.84	7	8.97	15	14.29	5	6.33	12	13.95	12	25.53
Diabetes w/complications	29	3.59	10	4.37	3	1.64	2	2.56	3	2.86	5	6.33	6	6.98	0	0
Diabetes without complications	102	12.64	22	9.61	21	11.48	9	11.54	16	15.24	16	20.25	11	12.79	7	14.89
Hemiplegia or paraplegia	1	0.12	0	0	0	0	0	0	1	0.95	0	0	0	0	0	0
HIV/AIDS	1	0.12	0	0	1	0.55	0	0	0	0	0	0	0	0	0	0
Hypertension	259	32.09	77	33.62	56	30.6	23	29.49	32	30.48	26	32.91	28	32.56	17	36.17
Mild liver disease	23	2.85	2	0.87	6	3.28	3	3.85	3	2.86	6	7.59	2	2.33	1	2.13
Moderate-to-severe liver disease	3	0.37	1	0.44	0	0	0	0	1	0.95	0	0	0	0	1	2.13
Myocardial infarction	13	1.61	4	1.75	1	0.55	1	1.28	2	1.9	3	3.8	2	2.33	0	0
Peptic ulcer disease	23	2.85	4	1.75	8	4.37	0	0	2	1.9	4	5.06	3	3.49	2	4.26
Peripheral vascular disease	14	1.73	3	1.31	3	1.64	2	2.56	2	1.9	1	1.27	2	2.33	1	2.13
Renal disease	8	0.99	1	0.44	3	1.64	0	0	3	2.86	1	1.27	0	0	0	0
Rheumatic disease	26	3.22	10	4.37	3	1.64	3	3.85	2	1.9	2	2.53	4	4.65	2	4.26
Skin ulcers/cellulitis	7	0.87	1	0.44	1	0.55	2	2.56	0	0	1	1.27	2	2.33	0	0
Grade of cancer at time of advanced diagnosis of STS (Known grade of cancer)	366	100	93	100	90	100	37	100	46	100	33	100	48	100	19	100
G1	15	4.1	4	4.3	3	3.33	3	8.11	3	6.52	1	3.03	1	2.08	0	0
G2	113	30.87	33	35.48	20	22.22	14	37.84	15	32.61	8	24.24	16	33.33	7	36.84
G3	233	63.66	55	59.14	65	72.22	20	54.05	27	58.7	23	69.7	31	64.58	12	63.16
Don't know	5	1.37	1	1.08	2	2.22	0	0	1	2.17	1	3.03	0	0	0	0
Size of the primary tumor at the time of advanced diagnosis of STS
≤ 5 cm	165	20.45	48	20.96	26	14.21	19	24.36	18	17.14	29	36.71	16	18.6	9	19.15
> 5 cm	592	73.36	165	72.05	142	77.6	52	66.67	86	81.9	44	55.7	65	75.58	38	80.85
Don't know	50	6.2	16	6.99	15	8.2	7	8.97	1	0.95	6	7.59	5	5.81	0	0
Depth of the primary tumor at the time of advance diagnosis of STS
Superficial	63	7.81	9	3.93	13	7.1	8	10.26	7	6.67	13	16.46	8	9.3	5	10.64
Deep	655	81.16	188	82.1	148	80.87	59	75.64	86	81.9	61	77.22	73	84.88	40	85.11
Don't know	89	11.03	32	13.97	22	12.02	11	14.1	12	11.43	5	6.33	5	5.81	2	4.26
Anatomic location of primary tumor at the time of advanced diagnosis of STS
Axilla	12	1.49	1	0.44	0	0	2	2.56	2	1.9	2	2.53	0	0	5	10.64
Breast	20	2.48	1	0.44	2	1.09	1	1.28	5	4.76	8	10.13	2	2.33	1	2.13
Lower extremity	187	23.17	35	15.28	36	19.67	27	34.62	24	22.86	20	25.32	31	36.05	14	29.79
Upper extremity	97	12.02	15	6.55	30	16.39	13	16.67	7	6.67	9	11.39	13	15.12	10	21.28
Head or neck	48	5.95	4	1.75	9	4.92	3	3.85	7	6.67	16	20.25	5	5.81	4	8.51
Gastrointestinal	38	4.71	12	5.24	12	6.56	3	3.85	4	3.81	2	2.53	5	5.81	0	0
Genitourinary	13	1.61	5	2.18	4	2.19	2	2.56	2	1.9	0	0	0	0	0	0
Gynecologic (other than uterus)	9	1.12	3	1.31	4	2.19	2	2.56	0	0	0	0	0	0	0	0
Mediastinum, lung, or pleura	26	3.22	2	0.87	9	4.92	1	1.28	4	3.81	7	8.86	2	2.33	1	2.13
Pelvis (nonvisceral)	65	8.05	20	8.73	15	8.2	9	11.54	8	7.62	3	3.8	8	9.3	2	4.26
Retroperitoneal	124	15.37	30	13.1	31	16.94	10	12.82	33	31.43	4	5.06	14	16.28	2	4.26
Trunk	67	8.3	12	5.24	25	13.66	4	5.13	8	7.62	5	6.33	5	5.81	8	17.02
Uterus	85	10.53	85	37.12	0	0	0	0	0	0	0	0	0	0	0	0
Don't know	13	1.61	4	1.75	6	3.28	0	0	0	0	2	2.53	1	1.16	0	0
Site of metastasis among patients with distant metastsis at the time of diagnosis of advanced STS (n,%)
Bone	105	15.89	24	12.9	24	16.22	11	17.74	10	12.66	12	18.75	16	19.75	8	19.51
Brain	16	2.42	5	2.69	5	3.38	1	1.61	3	3.8	1	1.56	1	1.23	0	0
Distant lymph nodes	161	24.36	52	27.96	28	18.92	18	29.03	15	18.99	17	26.56	21	25.93	10	24.39
Exoskeletal	28	4.24	7	3.76	6	4.05	4	6.45	3	3.8	4	6.25	2	2.47	2	4.88
Exoskeletal	28	4.24	7	3.76	6	4.05	4	6.45	3	3.8	4	6.25	2	2.47	2	4.88
Liver	187	28.29	51	27.42	42	28.38	16	25.81	23	29.11	26	40.63	20	24.69	9	21.95
Lung	468	70.8	125	67.2	114	77.03	40	64.52	65	82.28	37	57.81	54	66.67	33	80.49
Mediastinum	38	5.75	9	4.84	10	6.76	3	4.84	6	7.59	3	4.69	5	6.17	2	4.88
Pericardium	9	1.36	0	0	4	2.7	0	0	2	2.53	2	3.13	1	1.23	0	0
Peritoneum	98	14.83	35	18.82	27	18.24	5	8.06	13	16.46	3	4.69	14	17.28	1	2.44
Pleura	42	6.35	8	4.3	13	8.78	5	8.06	3	3.8	4	6.25	7	8.64	2	4.88
Retroperitoneum	18	2.72	8	4.3	6	4.05	1	1.61	1	1.27	1	1.56	0	0	1	2.44
Other	5	0.76	2	1.08	0	0	0	0	0	0	3	4.69	0	0	0	0
Don't know	2	0.3	0	0	1	0.68	0	0	0	0	0	0	0	0	1	2.44
PS at diagnosis of or progression to advanced STS
PS measured on the ECOG scale
Mean (SD)	1.22	0.63	1.2	0.62	1.26	0.69	1.03	0.66	1.31	0.58	1.3	0.63	1.2	0.59	1.13	0.58
Median	1		1		1		1		1		1		1		1
IQR (Q1, Q3)	1	2	1	2	1	2	1	1	1	2	1	2	1	1	1	1
Range (minimum, maximum)	0	4	0	3	0	4	0	2	0	2	0	3	0	3	0	2
Distribution
0=Fully active, able to carry on all pre-disease performance without restriction	84	10.41	24	10.48	21	11.48	16	20.51	6	5.71	6	7.59	6	6.98	5	10.64
1=Restricted in physically strenuous activity but ambulatory and able to carry out work of a light or sedentary nature, e.g., light house work, office work	474	58.74	138	60.26	98	53.55	44	56.41	60	57.14	44	55.7	59	68.6	31	65.96
2=Ambulatory and capable of all self-care but unable to carry out any work activities. Up and about more than 50% of waking hours	241	29.86	65	28.38	61	33.33	18	23.08	39	37.14	28	35.44	19	22.09	11	23.4
3=Capable of only limited self-care, confined to bed or chair more than 50% of waking hours	7	0.87	2	0.87	2	1.09	0	0	0	0	1	1.27	2	2.33	0	0
4=Completely disabled. Cannot carry on any self-care. Totally confined to bed or chair	1	0.12	0	0	1	0.55	0	0	0	0	0	0	0	0	0	0
Total follow-up time among ALL patients (months)c
Mean (SD)	24.69	20.86	25.58	18.04	24.29	21.79	23.2	15.07	29.16	31.51	22.48	18.61	21.88	16.18	23.27	18.88
Median	20.3		21.93		19.2		21.6		18.1		19.3		19.78		16.77
IQR (Q1, Q3)	10.73	30.6	13.4	30.73	9.9	28.63	10.87	29.27	9.83	34	9.53	30.93	9.47	30.83	11.7	28.57
Range (minimum, maximum)	0.03	132.57	1.7	116.87	0.03	109.63	2.23	69.3	1.53	132.57	1.53	82.47	1.4	95.33	1.9	97.03
Total follow-up time among patients who died during the follow-up period (months) (n,%)a	545	67.53	132	57.64	134	73.22	55	70.51	78	74.29	54	68.35	57	66.28	35	74.47
n (%)
Mean (SD)	19.78	19.1	19.76	15.78	19.84	19.88	18.37	12.73	24	27.7	17.69	17.32	15.83	13.84	22.08	21.63
Median	14.23		15.63		14.8		13.63		14.97		12.32		12.13		13.73
IQR (Q1, Q3)	8.73	23.07	9.3	24.87	7.73	23.47	9.63	23.97	8.83	27.37	5.63	20.1	8.47	20.3	10.2	26.33
Range (minimum, maximum)	0.03	130.7	1.7	86.27	0.03	109.63	2.23	66.93	1.53	130.7	1.53	76.57	1.4	95.33	1.9	97.03
Cause of death (n,%) (among those who died during the follow-up period)
STS related	517	94.86	124	93.94	124	92.54	53	96.36	77	98.72	49	90.74	56	98.25	34	97.14
nonSTS related	20	3.67	5	3.79	5	3.73	2	3.64	1	1.28	5	9.26	1	1.75	1	2.86
Don't know	8	1.47	3	2.27	5	3.73	0	0	0	0	0	0	0	0	0	0
Total follow-up time among patients alive at the end of the follow-up period (months) (n,%)a	233	28.87	88	38.43	45	24.59	21	26.92	20	19.05	22	27.85	26	30.23	11	23.4
n (%)
Mean (SD)	34.91	20.69	33.5	17.96	36.45	22.34	34.75	14.13	44.06	37.26	32.84	17.29	33.77	13.82	26.71	5.17
Median	28.6		26.5		27.77		29.27		29.03		29.3		31.7		25.68
IQR (Q1, Q3)	22.67	39.83	22.33	39.83	23.33	36.2	25.23	44.63	21.03	55.1	22.3	33.67	22.13	40.9	22.47	30.83
Range (minimum, maximum)	2.83	132.57	9.17	116.87	9.37	107.07	15.87	69.3	2.83	132.57	4.7	82.47	18	66.8	19.7	34.77
b Because the objective of the CCI score was to evaluate underlying comorbidity burden independent of STS, ICD-9-CM diagnosis codes for cancer were excluded from the CCI calculation for this study.
c Follow-up time calculated as the number of months between the first diagnosis of advanced STS and the earliest of death or end of the chart abstraction
d Patients with Stage (I,II or III) at initial diganosis and time from initial to advanced diagnosis greater than zero
AIDS = acquired immune deficiency syndrome; CCI = Charlson Comorbidity Index; HIV = human immunodeficiency virus; IQR = interquartile range; PS = Performance Status; SD = standard deviation; STS = soft tissue sarcoma.

## Sheet: Characteristics (UK)
Table B-2. Characteristics of Patients with a Diagnosis of Advanced Soft Tissue Sarcoma: United Kingdom
Characteristic	Total		Leiomyosarcomas		Others / NOS		Fibroblastic/Myofibroblastic		Liposarcomas		Vascular sarcomas		Rhabdomyosarcomas		Synovial sarcoma
	N	%	N	%	N	%	N	%	N	%	N	%	N	%	N	%
	199	100	61	100	40	100	24	100	14	100	16	100	33	100	11	100
Histological Subtype classification
Leiomyosarcomas	61	30.6533
Others / NOS	40	20.1005
Fibroblastic/Myofibroblastic	24	12.0603
Liposarcomas	14	7.03518
Vascular sarcomas	16	8.0402
Rhabdomyosarcomas	33	16.5829
Synovial sarcoma	11	5.52764
Sex
Male	126	63.32	27	44.26	31	77.5	20	83.33	10	71.43	11	68.75	21	63.64	6	54.55
Female	73	36.68	34	55.74	9	22.5	4	16.67	4	28.57	5	31.25	12	36.36	5	45.45
Ethnic Origin
White/Caucasian	178	89.45	57	93.44	35	87.5	21	87.5	11	78.57	15	93.75	29	87.88	10	90.91
African/black	10	5.03	3	4.92	2	5	2	8.33	2	14.29	0	0	1	3.03	0	0
Asian or Pacific Islander	6	3.02	1	1.64	2	5	0	0	0	0	1	6.25	1	3.03	1	9.09
Middle Eastern	2	1.01	0	0	0	0	0	0	1	7.14	0	0	1	3.03	0	0
Indian Subcontinent	3	1.51	0	0	1	2.5	1	4.17	0	0	0	0	1	3.03	0	0
Supplemental private insurance
Yes	11	5.53	6	9.84	2	5	0	0	0	0	1	6.25	2	6.06	0	0
No	172	86.43	51	83.61	34	85	22	91.67	12	85.71	13	81.25	29	87.88	11	100
Dont know	16	8.04	4	6.56	4	10	2	8.33	2	14.29	2	12.5	2	6.06	0	0
Stage of disease at initial diagnosis
1A	0	0	0	0	0	0	0	0	0	0	0	0	0	0	0	0
1B	6	3.02	4	6.56	0	0	1	4.17	0	0	0	0	1	3.03	0	0
IIA	7	3.52	2	3.28	1	2.5	0	0	2	14.29	0	0	2	6.06	0	0
IIB	12	6.03	4	6.56	2	5	0	0	0	0	2	12.5	1	3.03	3	27.27
III (with no regional lymph node metastasis)	6	3.02	2	3.28	1	2.5	0	0	2	14.29	1	6.25	0	0	0	0
III (with regional lymph node metastasis)	11	5.53	4	6.56	3	7.5	2	8.33	0	0	0	0	2	6.06	0	0
IV	157	78.89	45	73.77	33	82.5	21	87.5	10	71.43	13	81.25	27	81.82	8	72.73
Histological subtype
Adipoctic tumors	14	7.04	0	0	0	0	0	0	14	100	0	0	0	0	0	0
Angiosarcoma	15	7.54	0	0	0	0	0	0	0	0	15	93.75	0	0	0	0
Chondro-osssesous tumors	3	1.51	0	0	3	7.5	0	0	0	0	0	0	0	0	0	0
Fibroblastic/myofibroblastic tumor	24	12.06	0	0	0	0	24	100	0	0	0	0	0	0	0	0
Fibrohystiocytic tumor	3	1.51	0	0	3	7.5	0	0	0	0	0	0	0	0	0	0
Seketal muscle tumor	33	16.58	0	0	0	0	0	0	0	0	0	0	33	100	0	0
Smooth muscle tumor	48	24.12	48	78.69	0	0	0	0	0	0	0	0	0	0	0	0
Pericytic (perivascular) tumor	0	0	0	0	0	0	0	0	0	0	0	0	0	0	0	0
Vascular tumor of the soft tissue	1	0.5	0	0	0	0	0	0	0	0	1	6.25	0	0	0	0
Nerve sheath tumor	1	0.5	0	0	1	2.5	0	0	0	0	0	0	0	0	0	0
Synovial sarcoma	11	5.53	0	0	0	0	0	0	0	0	0	0	0	0	11	100
Tumor of uncertian differentiation	12	6.03	0	0	12	30	0	0	0	0	0	0	0	0	0	0
Uterine leiomyosarcoma	13	6.53	13	21.31	0	0	0	0	0	0	0	0	0	0	0	0
undifferentiated/unclassified sarcoma	19	9.55	0	0	19	47.5	0	0	0	0	0	0	0	0	0	0
Dont know	2	1.01	0	0	2	5	0	0	0	0	0	0	0	0	0	0
Number of patients where initial diagnosis was not advanced staged	25	12.5628	10	16.3934	3	7.5	1	4.16667	2	14.2857	2	12.5	4	12.1212	3	27.2727
Treatment received during time from initial diagnosis to diagnosis of advanced stage (among patients with initially non-advanced stage disease)
Neoadjuvant therapy	0	0	0	0	0	0	0	0	0	0	0	0	0	0	0
Adjuvant therapy	0	0	0	0	0	0	0	0	0	0	0	0	0	0	0	0
Radiotherapy	7	28	3	30	1	33.3333	0	0	1	50	0	0	2	50	0	0
Surgery	14	56	8	80	1	33.3333	0	0	2	100	1	50	2	50	0	0
Received radiation to the mediastinal/pericardial area	0	0	0	0	0	0	0	0	0	0	0	0	0	0	0	0
Time from initial diagnosis to advanced diagnosis (months)	25	12.5628	10	16.3934	3	7.5	1	4.16667	2	14.2857	2	12.5	4	12.1212	3	27.2727
Mean (SD)	22.6	14.56	27.27	19.14	16.02	10.27	33.77		25.9	9.24	9.5	0.8	25.07	10.93	13.16	1.64
Median	18.13		23.88		12.43		33.77		25.9		9.5		27.5		12.83
IQR (Q1, Q3)	10.23	32.43	9.57	41.8	8.03	27.6	33.77	33.77	19.37	32.43	8.93	10.07	17.02	33.12	11.7	14.93
Range (minimum, maximum)	5.5	62.43	5.5	62.43	8.03	27.6	33.77	33.77	19.37	32.43	8.93	10.07	10.23	35.03	11.7	14.93
Age at advanced diagnosis
Mean (SD)	56.46	12.4	55.82	12.22	56.8	13.66	57.63	11.96	53.71	10.22	59	15.76	55.42	11.35	59.18	11.45
Median	57		57		60.5		59		54.5		59		57		59
IQR (Q1, Q3)	49	67	50	64	46.5	68.5	50	67.5	44	64	52.5	68	50	64	48	70
Range (minimum, maximum)	21	90	21	76	23	75	25	73	35	67	24	90	23	74	39	73
Distribution
18-24	5	2.51	1	1.64	2	5	0	0	0	0	1	6.25	1	3.03	0	0
25-34	5	2.51	2	3.28	0	0	1	4.17	0	0	1	6.25	1	3.03	0	0
35-44	22	11.06	7	11.48	5	12.5	2	8.33	4	28.57	0	0	3	9.09	1	9.09
45-54	50	25.13	16	26.23	10	25	6	25	3	21.43	3	18.75	9	27.27	3	27.27
55-64	58	29.15	20	32.79	9	22.5	6	25	4	28.57	5	31.25	12	36.36	2	18.18
65-69	27	13.57	6	9.84	5	12.5	4	16.67	3	21.43	3	18.75	4	12.12	2	18.18
70-74	27	13.57	7	11.48	8	20	5	20.83	0	0	1	6.25	3	9.09	3	27.27
75+	5	2.51	2	3.28	1	2.5	0	0	0	0	2	12.5	0	0	0	0
Facility where treatment was received for advanced STS
Cancer center	173	86.93	56	91.8	32	80	22	91.67	12	85.71	15	93.75	25	75.76	11	100
Academic/teaching hospital	25	12.56	5	8.2	7	17.5	2	8.33	2	14.29	1	6.25	8	24.24	0	0
Other public non-teaching hospital	0	0	0	0	0	0	0	0	0	0	0	0	0	0	0	0
Private hospital or clinic	1	0.5	0	0	1	2.5	0	0	0	0	0	0	0	0	0	0
Military hospital	0	0	0	0	0	0	0	0	0	0	0	0	0	0	0	0
Other	0	0	0	0	0	0	0	0	0	0	0	0	0	0	0	0
Weight in Kg at time of advanced diagnosis (known weight information)	129	100	41	100	19	100	17	100	10	100	10	100	22	100	10	100
Mean (SD)	71.65	9.29	72.35	7.73	71.03	9.07	69.29	4.19	80.18	15.25	75.52	13.91	66.86	7.18	72.1	7.19
Median	70		71		70		69		78		69.5		68		73
IQR (Q1, Q3)	67	76	67	76	67	79	67	71	76	84	67	78	63	70	65	80
Range (minimum, maximum)	47.5	113.8	53	90	47.5	88	62	77	54	113.8	65	107.2	52	81	64	82
Body surface area at time of advanced diagnosis (known BSA information)	128	100	40	100	19	100	17	100	10	100	10	100	22	100	10	100
Mean (SD)	1.85	0.14	1.86	0.12	1.84	0.15	1.82	0.06	1.96	0.2	1.91	0.19	1.77	0.13	1.85	0.09
Median	1.85		1.87		1.84		1.8		1.94		1.83		1.79		1.88
IQR (Q1, Q3)	1.76	1.93	1.76	1.93	1.76	1.94	1.79	1.86	1.9	1.99	1.79	1.9	1.69	1.86	1.76	1.93
Range (minimum, maximum)	1.48	2.42	1.53	2.13	1.48	2.07	1.71	1.93	1.59	2.42	1.75	2.33	1.5	1.99	1.73	1.99
Charlson Comorbidity Index (CCI) score at time of diagnosis of advanced STS
Mean (SD)	0.96	1.06	0.97	1.3	0.88	0.97	0.79	0.78	0.86	0.77	1.19	0.98	0.94	1	1.55	1.04
Median	1		1		1		1		1		1		1		2
IQR (Q1, Q3)	0	2	0	1	0	1	0	1	0	1	0.5	2	0	2	1	2
Range (minimum, maximum)	0	5	0	5	0	4	0	2	0	2	0	3	0	3	0	3
Distribution
0	82	41.21	30	49.18	17	42.5	10	41.67	5	35.71	4	25	14	42.42	2	18.18
1	67	33.67	18	29.51	14	35	9	37.5	6	42.86	7	43.75	10	30.3	3	27.27
2	32	16.08	4	6.56	7	17.5	5	20.83	3	21.43	3	18.75	6	18.18	4	36.36
3+	18	9.05	9	14.75	2	5	0	0	0	0	2	12.5	3	9.09	2	18.18
CCI conditions at time of diagnosis of advanced STSb
Cerebrovascular disease	9	4.52	5	8.2	0	0	1	4.17	0	0	1	6.25	2	6.06	0	0
Chronic pulmonary disease	12	6.03	5	8.2	4	10	0	0	0	0	2	12.5	1	3.03	0	0
Congestive heart failure	3	1.51	3	4.92	0	0	0	0	0	0	0	0	0	0	0	0
Dementia	0	0	0	0	0	0	0	0	0	0	0	0	0	0	0	0
Depression	23	11.56	7	11.48	6	15	0	0	3	21.43	1	6.25	1	3.03	5	45.45
Diabetes w/complications	9	4.52	5	8.2	1	2.5	0	0	0	0	1	6.25	2	6.06	0	0
Diabetes without complications	20	10.05	4	6.56	3	7.5	4	16.67	1	7.14	3	18.75	3	9.09	2	18.18
Hemiplegia or paraplegia	0	0	0	0	0	0	0	0	0	0	0	0	0	0	0	0
HIV/AIDS	0	0	0	0	0	0	0	0	0	0	0	0	0	0	0	0
Hypertension	64	32.16	16	26.23	14	35	6	25	6	42.86	6	37.5	10	30.3	6	54.55
Mild liver disease	7	3.52	0	0	3	7.5	1	4.17	1	7.14	1	6.25	1	3.03	0	0
Moderate-to-severe liver disease	0	0	0	0	0	0	0	0	0	0	0	0	0	0	0	0
Myocardial infarction	5	2.51	2	3.28	0	0	0	0	1	7.14	1	6.25	1	3.03	0	0
Peptic ulcer disease	8	4.02	2	3.28	2	5	0	0	0	0	1	6.25	1	3.03	2	18.18
Peripheral vascular disease	3	1.51	0	0	0	0	2	8.33	0	0	0	0	1	3.03	0	0
Renal disease	1	0.5	1	1.64	0	0	0	0	0	0	0	0	0	0	0	0
Rheumatic disease	12	6.03	3	4.92	1	2.5	1	4.17	0	0	1	6.25	4	12.12	2	18.18
Skin ulcers/cellulitis	3	1.51	0	0	0	0	2	8.33	0	0	0	0	1	3.03	0	0
Grade of cancer at time of advanced diagnosis of STS (Known grade of cancer)	74	100	23	100	7	100	12	100	2	100	8	100	16	100	6	100
G1	1	1.35	1	4.35	0	0	0	0	0	0	0	0	0	0	0	0
G2	25	33.78	15	65.22	2	28.57	3	25	0	0	1	12.5	4	25	0	0
G3	48	64.86	7	30.43	5	71.43	9	75	2	100	7	87.5	12	75	6	100
Don't know	0	0	0	0	0	0	0	0	0	0	0	0	0	0	0	0
Size of the primary tumor at the time of advanced diagnosis of STS
≤ 5 cm	36	18.09	12	19.67	4	10	6	25	3	21.43	6	37.5	5	15.15	0	0
> 5 cm	143	71.86	41	67.21	30	75	16	66.67	11	78.57	8	50	26	78.79	11	100
Don't know	20	10.05	8	13.11	6	15	2	8.33	0	0	2	12.5	2	6.06	0	0
Depth of the primary tumor at the time of advance diagnosis of STS
Superficial	12	6.03	4	6.56	1	2.5	3	12.5	0	0	2	12.5	2	6.06	0	0
Deep	154	77.39	47	77.05	32	80	14	58.33	10	71.43	12	75	29	87.88	10	90.91
Don't know	33	16.58	10	16.39	7	17.5	7	29.17	4	28.57	2	12.5	2	6.06	1	9.09
Anatomic location of primary tumor at the time of advanced diagnosis of STS
Axilla	5	2.51	1	1.64	0	0	1	4.17	0	0	1	6.25	0	0	2	18.18
Breast	3	1.51	1	1.64	0	0	0	0	1	7.14	0	0	0	0	1	9.09
Lower extremity	42	21.11	10	16.39	1	2.5	8	33.33	3	21.43	5	31.25	10	30.3	5	45.45
Upper extremity	27	13.57	7	11.48	7	17.5	6	25	1	7.14	1	6.25	5	15.15	0	0
Head or neck	15	7.54	1	1.64	3	7.5	1	4.17	2	14.29	6	37.5	2	6.06	0	0
Gastrointestinal	16	8.04	4	6.56	5	12.5	1	4.17	0	0	1	6.25	5	15.15	0	0
Genitourinary	4	2.01	1	1.64	2	5	1	4.17	0	0	0	0	0	0	0	0
Gynecologic (other than uterus)	1	0.5	0	0	1	2.5	0	0	0	0	0	0	0	0	0	0
Mediastinum, lung, or pleura	4	2.01	0	0	2	5	0	0	1	7.14	0	0	1	3.03	0	0
Pelvis (nonvisceral)	23	11.56	8	13.11	4	10	3	12.5	2	14.29	1	6.25	3	9.09	2	18.18
Retroperitoneal	24	12.06	6	9.84	10	25	1	4.17	2	14.29	1	6.25	4	12.12	0	0
Trunk	16	8.04	5	8.2	4	10	2	8.33	2	14.29	0	0	2	6.06	1	9.09
Uterus	13	6.53	13	21.31	0	0	0	0	0	0	0	0	0	0	0	0
Don't know	6	3.02	4	6.56	1	2.5	0	0	0	0	0	0	1	3.03	0	0
Site of metastasis among patients with distant metastsis at the time of diagnosis of advanced STS (n,%)
Bone	26	14.44	7	12.28	7	18.92	2	9.09	3	30	1	8.33	5	16.13	1	9.09
Brain	3	1.67	0	0	3	8.11	0	0	0	0	0	0	0	0	0	0
Distant lymph nodes	56	31.11	16	28.07	14	37.84	7	31.82	3	30	6	50	8	25.81	2	18.18
Exoskeletal	10	5.56	0	0	2	5.41	2	9.09	1	10	2	16.67	1	3.23	2	18.18
Exoskeletal	10	5.56	0	0	2	5.41	2	9.09	1	10	2	16.67	1	3.23	2	18.18
Liver	58	32.22	18	31.58	13	35.14	7	31.82	5	50	6	50	8	25.81	1	9.09
Lung	112	62.22	31	54.39	23	62.16	16	72.73	9	90	4	33.33	20	64.52	9	81.82
Mediastinum	11	6.11	3	5.26	3	8.11	1	4.55	1	10	1	8.33	2	6.45	0	0
Pericardium	2	1.11	0	0	2	5.41	0	0	0	0	0	0	0	0	0	0
Peritoneum	32	17.78	18	31.58	8	21.62	0	0	1	10	0	0	5	16.13	0	0
Pleura	8	4.44	2	3.51	3	8.11	2	9.09	0	0	0	0	0	0	1	9.09
Retroperitoneum	5	2.78	2	3.51	3	8.11	0	0	0	0	0	0	0	0	0	0
Other	1	0.56	1	1.75	0	0	0	0	0	0	0	0	0	0	0	0
Don't know	1	0.56	0	0	0	0	0	0	0	0	0	0	0	0	1	9.09
PS at diagnosis of or progression to advanced STS
PS measured on the ECOG scale
Mean (SD)	1.04	0.43	1.03	0.45	1.08	0.42	0.96	0.36	1	0.55	1.13	0.62	1.06	0.35	0.91	0.3
Median	1		1		1		1		1		1		1		1
IQR (Q1, Q3)	1	1	1	1	1	1	1	1	1	1	1	1.5	1	1	1	1
Range (minimum, maximum)	0	2	0	2	0	2	0	2	0	2	0	2	0	2	0	1
Distribution
0=Fully active, able to carry on all pre-disease performance without restriction	15	7.54	5	8.2	2	5	2	8.33	2	14.29	2	12.5	1	3.03	1	9.09
1=Restricted in physically strenuous activity but ambulatory and able to carry out work of a light or sedentary nature, e.g., light house work, office work	162	81.41	49	80.33	33	82.5	21	87.5	10	71.43	10	62.5	29	87.88	10	90.91
2=Ambulatory and capable of all self-care but unable to carry out any work activities. Up and about more than 50% of waking hours	22	11.06	7	11.48	5	12.5	1	4.17	2	14.29	4	25	3	9.09	0	0
3=Capable of only limited self-care, confined to bed or chair more than 50% of waking hours	0	0	0	0	0	0	0	0	0	0	0	0	0	0	0	0
4=Completely disabled. Cannot carry on any self-care. Totally confined to bed or chair	0	0	0	0	0	0	0	0	0	0	0	0	0	0	0	0
Total follow-up time among ALL patients (months)c
Mean (SD)	23.33	14.09	26.64	14.58	20.16	14.13	19.79	11.18	19.63	16.88	25.26	15.3	24.04	13.92	23.99	9.2
Median	20.6		23.87		16.92		19.78		16.65		22.1		21.3		25.23
IQR (Q1, Q3)	13.17	30.6	15.57	33.47	11.17	25.6	10.38	24.6	6.7	21.27	15.58	30.25	13.13	30.83	14.8	31.13
Range (minimum, maximum)	2.6	73.63	5.93	73.63	2.6	71.23	6.7	56.93	4.13	61.9	3.93	64.23	8.4	61.6	10.93	34.77
Total follow-up time among patients who died during the follow-up period (months) (n,%)a	133	66.83	34	55.74	29	72.5	20	83.33	12	85.71	10	62.5	23	69.7	5	45.45
n (%)
Mean (SD)	17.81	11.02	19.06	11.95	15.83	9.9	16.57	7.29	15.78	12.52	23.5	19.34	18.36	8.6	16.76	8.23
Median	16.2		16.42		15.8		18.12		15.92		19.03		18.3		14.8
IQR (Q1, Q3)	10.4	21.27	12.2	21.8	9.9	18.47	9.63	21.6	6.05	19.95	10.23	22.03	11.7	22.23	11.93	15
Range (minimum, maximum)	2.6	73.63	5.93	73.63	2.6	41.83	6.7	30.27	4.13	49.77	3.93	64.23	8.4	44.3	10.93	31.13
Cause of death (n,%) (among those who died during the follow-up period)	133	66.83	34	55.74	29	72.5	20	83.33	12	85.71	10	62.5	23	69.7	5	45.45
STS related	126	94.74	31	91.18	28	96.55	19	95	12	100	9	90	23	100	4	80
nonSTS related	5	3.76	2	5.88	0	0	1	5	0	0	1	10	0	0	1	20
Don't know	2	1.5	1	2.94	1	3.45	0	0	0	0	0	0	0	0	0	0
Total follow-up time among patients alive at the end of the follow-up period (months) (n,%)a	59	29.65	24	39.34	10	25	3	12.5	2	14.29	6	37.5	8	24.24	6	54.55
n (%)
Mean (SD)	34.46	13.04	36.19	11.79	31.58	17.5	35.92	14.31	42.75	27.08	28.21	3.49	37.1	15.38	30.02	4.38
Median	31.23		34		25.7		30.75		42.75		29.2		31.95		30.83
IQR (Q1, Q3)	25.23	40.1	25.47	44.13	20.6	40.1	27.2	44.63	23.6	61.9	26.2	31.2	25.47	56.77	25.23	34.13
Range (minimum, maximum)	9.37	71.23	20.6	70.93	9.37	71.23	25.23	56.93	23.6	61.9	22.17	31.27	20.1	61.6	24.33	34.77
a Note, for 7 patients it was unknown if the patient was currently alive.
b Because the objective of the CCI score was to evaluate underlying comorbidity burden independent of STS, ICD-9-CM diagnosis codes for cancer were excluded from the CCI calculation for this study.
c Follow-up time calculated as the number of months between the first diagnosis of advanced STS and the earliest of death or end of the chart abstraction
d Patients with Stage (I,II or III) at initial diganosis and time from initial to advanced diagnosis greater than zero
AIDS = acquired immune deficiency syndrome; CCI = Charlson Comorbidity Index; HIV = human immunodeficiency virus; IQR = interquartile range; PS = Performance Status; SD = standard deviation; STS = soft tissue sarcoma.

## Sheet: Characteristics (Spain)
Table B-3. Characteristics of Patients with a Diagnosis of Advanced Soft Tissue Sarcoma: Spain
Characteristic	Total		Leiomyosarcomas		Others / NOS		Fibroblastic/Myofibroblastic		Liposarcomas		Vascular sarcomas		Rhabdomyosarcomas		Synovial sarcoma
	N	%	N	%	N	%	N	%	N	%	N	%	N	%	N	%
	203	100	45	100	35	100	18	100	44	100	25	100	20	100	16	100
Histological Subtype classification
Leiomyosarcomas	45	22.1675
Others / NOS	35	17.2414
Fibroblastic/Myofibroblastic	18	8.867
Liposarcomas	44	21.6749
Vascular sarcomas	25	12.3153
Rhabdomyosarcomas	20	9.85222
Synovial sarcoma	16	7.88177
Sex
Male	123	60.59	16	35.56	25	71.43	13	72.22	33	75	15	60	11	55	10	62.5
Female	80	39.41	29	64.44	10	28.57	5	27.78	11	25	10	40	9	45	6	37.5
Ethnic Origin
White/Caucasian	201	99.01	45	100	35	100	18	100	44	100	24	96	20	100	15	93.75
African/black	0	0	0	0	0	0	0	0	0	0	0	0	0	0	0	0
Asian or Pacific Islander	0	0	0	0	0	0	0	0	0	0	0	0	0	0	0	0
Middle Eastern	2	0.99	0	0	0	0	0	0	0	0	1	4	0	0	1	6.25
Indian Subcontinent	0	0	0	0	0	0	0	0	0	0	0	0	0	0	0	0
Supplemental private insurance
Yes	15	7.39	3	6.67	1	2.86	2	11.11	3	6.82	3	12	2	10	1	6.25
No	144	70.94	32	71.11	25	71.43	12	66.67	35	79.55	16	64	11	55	13	81.25
Dont know	44	21.67	10	22.22	9	25.71	4	22.22	6	13.64	6	24	7	35	2	12.5
Stage of disease at initial diagnosis
1A	0	0	0	0	0	0	0	0	0	0	0	0	0	0	0	0
1B	5	2.46	0	0	0	0	2	11.11	1	2.27	1	4	1	5	0	0
IIA	9	4.43	0	0	1	2.86	1	5.56	4	9.09	2	8	1	5	0	0
IIB	30	14.78	8	17.78	7	20	3	16.67	5	11.36	3	12	1	5	3	18.75
III (with no regional lymph node metastasis)	10	4.93	1	2.22	2	5.71	2	11.11	3	6.82	2	8	0	0	0	0
III (with regional lymph node metastasis)	10	4.93	0	0	2	5.71	2	11.11	5	11.36	1	4	0	0	0	0
IV	139	68.47	36	80	23	65.71	8	44.44	26	59.09	16	64	17	85	13	81.25
Histological subtype
Adipoctic tumors	44	21.67	0	0	0	0	0	0	44	100	0	0	0	0	0	0
Angiosarcoma	22	10.84	0	0	0	0	0	0	0	0	22	88	0	0	0	0
Chondro-osssesous tumors	3	1.48	0	0	3	8.57	0	0	0	0	0	0	0	0	0	0
Fibroblastic/myofibroblastic tumor	18	8.87	0	0	0	0	18	100	0	0	0	0	0	0	0	0
Fibrohystiocytic tumor	10	4.93	0	0	10	28.57	0	0	0	0	0	0	0	0	0	0
Seketal muscle tumor	20	9.85	0	0	0	0	0	0	0	0	0	0	20	100	0	0
Smooth muscle tumor	23	11.33	23	51.11	0	0	0	0	0	0	0	0	0	0	0	0
Pericytic (perivascular) tumor	0	0	0	0	0	0	0	0	0	0	0	0	0	0	0	0
Vascular tumor of the soft tissue	3	1.48	0	0	0	0	0	0	0	0	3	12	0	0	0	0
Nerve sheath tumor	1	0.49	0	0	1	2.86	0	0	0	0	0	0	0	0	0	0
Synovial sarcoma	16	7.88	0	0	0	0	0	0	0	0	0	0	0	0	16	100
Tumor of uncertian differentiation	3	1.48	0	0	3	8.57	0	0	0	0	0	0	0	0	0	0
Uterine leiomyosarcoma	22	10.84	22	48.89	0	0	0	0	0	0	0	0	0	0	0	0
undifferentiated/unclassified sarcoma	18	8.87	0	0	18	51.43	0	0	0	0	0	0	0	0	0	0
Dont know	0	0	0	0	0	0	0	0	0	0	0	0	0	0	0	0
Number of patients where initial diagnosis was not advanced staged	54	26.601	9	20	11	31.4286	7	38.8889	14	31.8182	7	28	3	15	3	18.75
Treatment received during time from initial diagnosis to diagnosis of advanced stage (among patients with initially non-advanced stage disease)
Neoadjuvant therapy	3	5.55556	0	0	0	0	0	0	1	7.14286	1	14.2857	1	33.3333	0	0
Adjuvant therapy	6	11.1111	2	22.2222	1	9.09091	0	0	2	14.2857	1	14.2857	0	0	0	0
Radiotherapy	15	27.7778	2	22.2222	2	18.1818	2	28.5714	3	21.4286	4	57.1429	2	66.6667	0	0
Surgery	44	81.4815	8	88.8889	8	72.7273	6	85.7143	10	71.4286	6	85.7143	3	100	3	100
Received radiation to the mediastinal/pericardial area	0	0	0	0	0	0	0	0	0	0	0	0	0	0	0	0
Time from initial diagnosis to advanced diagnosis (months)	54	26.601	9	20	11	31.4286	7	38.8889	14	31.8182	7	28	3	15	3	18.75
Mean (SD)	19.61	17.71	18.21	19.98	18.72	21.25	20.95	13.14	19.37	19.8	22.96	17	18.73	9.2	18.22	19.26
Median	11.28		11.4		10.1		23.3		10.57		14.07		16.1		7.23
IQR (Q1, Q3)	7.23	28.27	9.9	16.9	3.67	28.27	7.03	33.9	5.27	26.83	10.7	44.03	11.13	28.97	6.97	40.47
Range (minimum, maximum)	0.47	70.63	6.73	70.63	2.33	62.17	6.3	36.97	0.47	67.4	7.27	48.77	11.13	28.97	6.97	40.47
Age at advanced diagnosis
Mean (SD)	56.63	13.09	58.24	12.29	59.23	13.23	53.78	13.16	54.16	12.52	57	13.93	60.25	13.99	51.31	12.79
Median	57		60		62		56		55.5		55		67.5		49.5
IQR (Q1, Q3)	48	67	51	65	54	68	48	63	46.5	61.5	47	68	51.5	71	46	60.5
Range (minimum, maximum)	21	85	23	85	27	82	21	75	22	74	24	81	33	78	22	72
Distribution
18-24	5	2.46	1	2.22	0	0	1	5.56	1	2.27	1	4	0	0	1	6.25
25-34	9	4.43	1	2.22	2	5.71	1	5.56	2	4.55	0	0	2	10	1	6.25
35-44	18	8.87	3	6.67	3	8.57	1	5.56	8	18.18	2	8	1	5	0	0
45-54	51	25.12	12	26.67	4	11.43	5	27.78	10	22.73	9	36	4	20	7	43.75
55-64	57	28.08	15	33.33	12	34.29	7	38.89	13	29.55	4	16	2	10	4	25
65-69	32	15.7635	6	13.3333	8	22.8571	2	11.1111	5	11.3636	4	16	5	25	2	12.5
70-74	17	8.37438	3	6.66667	3	8.57143	0	0	5	11.3636	1	4	4	20	1	6.25
75+	14	6.9	4	8.89	3	8.57	1	5.56	0	0	4	16	2	10	0	0
Facility where treatment was received for advanced STS
Cancer center	5	2.46	0	0	2	5.71	0	0	3	6.82	0	0	0	0	0	0
Academic/teaching hospital	177	87.19	39	86.67	28	80	17	94.44	38	86.36	21	84	18	90	16	100
Other public non-teaching hospital	11	5.42	3	6.67	4	11.43	0	0	1	2.27	1	4	2	10	0	0
Private hospital or clinic	0	0	0	0	0	0	0	0	0	0	0	0	0	0	0	0
Military hospital	0	0	0	0	0	0	0	0	0	0	0	0	0	0	0	0
Other	10	4.93	3	6.67	1	2.86	1	5.56	2	4.55	3	12	0	0	0	0
Weight in Kg at time of advanced diagnosis (known weight information)	149	100	31	100	28	100	14	100	28	100	18	100	17	100	13	100
Mean (SD)	70.05	10.52	67.13	11.22	67.32	9.8	70.43	8.12	70.68	9.43	75.5	12.48	70.24	9.4	73.31	11.31
Median	70		67		68		69		72		74.5		70		71
IQR (Q1, Q3)	63	78	60	75	59.5	74.5	65	78	62	79.5	65	84	64	77	68	78
Range (minimum, maximum)	48	102	48	94	50	87	56	84	55	85	57	98	57	90	58	102
Body surface area at time of advanced diagnosis (known BSA information)	149	100	31	100	28	100	14	100	28	100	18	100	17	100	13	100
Mean (SD)	1.8	0.16	1.74	0.17	1.77	0.16	1.82	0.13	1.82	0.15	1.88	0.19	1.81	0.13	1.86	0.17
Median	1.81		1.75		1.75		1.84		1.85		1.84		1.8		1.86
IQR (Q1, Q3)	1.7	1.94	1.61	1.87	1.65	1.9	1.75	1.91	1.68	1.97	1.73	2.06	1.68	1.87	1.74	1.94
Range (minimum, maximum)	1.41	2.3	1.41	2.01	1.48	2.05	1.57	2	1.57	2.04	1.57	2.2	1.66	2.04	1.64	2.3
Charlson Comorbidity Index (CCI) score at time of diagnosis of advanced STS
Mean (SD)	1.03	0.97	0.96	0.98	1.11	1.02	1	1.03	1.07	0.9	1	1.04	1.3	1.13	0.69	0.6
Median	1		1		1		1		1		1		1		1
IQR (Q1, Q3)	0	2	0	1	0	2	0	2	0	2	0	2	0	2	0	1
Range (minimum, maximum)	0	4	0	4	0	3	0	3	0	3	0	3	0	4	0	2
Distribution
0	71	34.98	15	33.33	13	37.14	8	44.44	13	29.55	10	40	6	30	6	37.5
1	73	35.96	22	48.89	8	22.86	3	16.67	18	40.91	8	32	5	25	9	56.25
2	44	21.67	5	11.11	11	31.43	6	33.33	10	22.73	4	16	7	35	1	6.25
3+	15	7.39	3	6.67	3	8.57	1	5.56	3	6.82	3	12	2	10	0	0
CCI conditions at time of diagnosis of advanced STSb
Cerebrovascular disease	5	2.46	3	6.67	1	2.86	0	0	0	0	1	4	0	0	0	0
Chronic pulmonary disease	17	8.37	1	2.22	1	2.86	0	0	9	20.45	2	8	3	15	1	6.25
Congestive heart failure	6	2.96	2	4.44	0	0	0	0	1	2.27	2	8	1	5	0	0
Dementia	2	0.99	0	0	0	0	1	5.56	1	2.27	0	0	0	0	0	0
Depression	33	16.26	6	13.33	5	14.29	4	22.22	8	18.18	2	8	5	25	3	18.75
Diabetes w/complications	3	1.48	1	2.22	0	0	1	5.56	0	0	0	0	1	5	0	0
Diabetes without complications	40	19.7	4	8.89	11	31.43	2	11.11	9	20.45	6	24	6	30	2	12.5
Hemiplegia or paraplegia	1	0.49	0	0	0	0	0	0	1	2.27	0	0	0	0	0	0
HIV/AIDS	0	0	0	0	0	0	0	0	0	0	0	0	0	0	0	0
Hypertension	63	31.03	17	37.78	11	31.43	6	33.33	10	22.73	7	28	7	35	5	31.25
Mild liver disease	9	4.43	1	2.22	2	5.71	2	11.11	1	2.27	2	8	1	5	0	0
Moderate-to-severe liver disease	2	0.99	1	2.22	0	0	0	0	1	2.27	0	0	0	0	0	0
Myocardial infarction	1	0.49	0	0	0	0	0	0	0	0	1	4	0	0	0	0
Peptic ulcer disease	5	2.46	1	2.22	1	2.86	0	0	1	2.27	2	8	0	0	0	0
Peripheral vascular disease	4	1.97	2	4.44	0	0	0	0	1	2.27	0	0	1	5	0	0
Renal disease	2	0.99	0	0	2	5.71	0	0	0	0	0	0	0	0	0	0
Rheumatic disease	4	1.97	1	2.22	1	2.86	1	5.56	1	2.27	0	0	0	0	0	0
Skin ulcers/cellulitis	1	0.49	0	0	1	2.86	0	0	0	0	0	0	0	0	0	0
Grade of cancer at time of advanced diagnosis of STS (Known grade of cancer)	67	100	9	100	13	100	5	100	16	100	5	100	14	100	5	100
G1	2	2.99	0	0	0	0	0	0	1	6.25	1	20	0	0	0	0
G2	22	32.84	2	22.22	3	23.08	3	60	5	31.25	0	0	7	50	2	40
G3	43	64.18	7	77.78	10	76.92	2	40	10	62.5	4	80	7	50	3	60
Don't know	0	0	0	0	0	0	0	0	0	0	0	0	0	0	0	0
Size of the primary tumor at the time of advanced diagnosis of STS
≤ 5 cm	31	15.27	4	8.89	2	5.71	3	16.67	10	22.73	8	32	2	10	2	12.5
> 5 cm	163	80.3	39	86.67	31	88.57	14	77.78	33	75	16	64	16	80	14	87.5
Don't know	9	4.43	2	4.44	2	5.71	1	5.56	1	2.27	1	4	2	10	0	0
Depth of the primary tumor at the time of advance diagnosis of STS
Superficial	17	8.37	1	2.22	1	2.86	3	16.67	3	6.82	7	28	1	5	1	6.25
Deep	171	84.24	38	84.44	30	85.71	15	83.33	38	86.36	17	68	18	90	15	93.75
Don't know	15	7.39	6	13.33	4	11.43	0	0	3	6.82	1	4	1	5	0	0
Anatomic location of primary tumor at the time of advanced diagnosis of STS
Axilla	2	0.99	0	0	0	0	1	5.56	1	2.27	0	0	0	0	0	0
Breast	7	3.45	0	0	1	2.86	1	5.56	1	2.27	4	16	0	0	0	0
Lower extremity	53	26.11	6	13.33	9	25.71	6	33.33	14	31.82	6	24	8	40	4	25
Upper extremity	28	13.79	2	4.44	7	20	3	16.67	2	4.55	5	20	2	10	7	43.75
Head or neck	12	5.91	0	0	0	0	2	11.11	5	11.36	4	16	0	0	1	6.25
Gastrointestinal	5	2.46	1	2.22	1	2.86	1	5.56	2	4.55	0	0	0	0	0	0
Genitourinary	3	1.48	1	2.22	1	2.86	0	0	1	2.27	0	0	0	0	0	0
Gynecologic (other than uterus)	2	0.99	2	4.44	0	0	0	0	0	0	0	0	0	0	0	0
Mediastinum, lung, or pleura	9	4.43	1	2.22	2	5.71	0	0	2	4.55	2	8	1	5	1	6.25
Pelvis (nonvisceral)	13	6.4	3	6.67	4	11.43	1	5.56	2	4.55	1	4	2	10	0	0
Retroperitoneal	33	16.26	6	13.33	6	17.14	3	16.67	10	22.73	1	4	6	30	1	6.25
Trunk	11	5.42	1	2.22	4	11.43	0	0	3	6.82	0	0	1	5	2	12.5
Uterus	22	10.84	22	48.89	0	0	0	0	0	0	0	0	0	0	0	0
Don't know	1	0.49	0	0	0	0	0	0	0	0	1	4	0	0	0	0
Site of metastasis among patients with distant metastsis at the time of diagnosis of advanced STS (n,%)
Bone	30	18.07	7	16.67	3	10.71	3	27.27	4	12.5	6	28.57	5	26.32	2	15.38
Brain	8	4.82	2	4.76	1	3.57	1	9.09	3	9.38	1	4.76	0	0	0	0
Distant lymph nodes	36	21.69	11	26.19	5	17.86	5	45.45	5	15.63	4	19.05	4	21.05	2	15.38
Exoskeletal	6	3.61	1	2.38	2	7.14	0	0	1	3.13	1	4.76	1	5.26	0	0
Exoskeletal	6	3.61	1	2.38	2	7.14	0	0	1	3.13	1	4.76	1	5.26	0	0
Liver	42	25.3	11	26.19	8	28.57	2	18.18	9	28.13	6	28.57	4	21.05	2	15.38
Lung	125	75.3	32	76.19	22	78.57	6	54.55	24	75	18	85.71	13	68.42	10	76.92
Mediastinum	11	6.63	3	7.14	2	7.14	1	9.09	2	6.25	1	4.76	0	0	2	15.38
Pericardium	3	1.81	0	0	0	0	0	0	2	6.25	1	4.76	0	0	0	0
Peritoneum	15	9.04	5	11.9	3	10.71	2	18.18	3	9.38	0	0	2	10.53	0	0
Pleura	12	7.23	3	7.14	3	10.71	0	0	2	6.25	1	4.76	2	10.53	1	7.69
Retroperitoneum	5	3.01	2	4.76	1	3.57	1	9.09	1	3.13	0	0	0	0	0	0
Other	0	0	0	0	0	0	0	0	0	0	0	0	0	0	0	0
Don't know	1	0.6	0	0	1	3.57	0	0	0	0	0	0	0	0	0	0
PS at diagnosis of or progression to advanced STS
PS measured on the ECOG scale
Mean (SD)	1.36	0.7	1.27	0.81	1.43	0.7	1.17	0.86	1.43	0.55	1.28	0.68	1.55	0.76	1.44	0.51
Median	1		1		1		1		1		1		1.5		1
IQR (Q1, Q3)	1	2	1	2	1	2	0	2	1	2	1	2	1	2	1	2
Range (minimum, maximum)	0	3	0	2	0	3	0	2	0	2	0	2	0	3	1	2
Distribution
0=Fully active, able to carry on all pre-disease performance without restriction	23	11.33	10	22.22	3	8.57	5	27.78	1	2.27	3	12	1	5	0	0
1=Restricted in physically strenuous activity but ambulatory and able to carry out work of a light or sedentary nature, e.g., light house work, office work	86	42.36	13	28.89	15	42.86	5	27.78	23	52.27	12	48	9	45	9	56.25
2=Ambulatory and capable of all self-care but unable to carry out any work activities. Up and about more than 50% of waking hours	91	44.83	22	48.89	16	45.71	8	44.44	20	45.45	10	40	8	40	7	43.75
3=Capable of only limited self-care, confined to bed or chair more than 50% of waking hours	3	1.48	0	0	1	2.86	0	0	0	0	0	0	2	10	0	0
4=Completely disabled. Cannot carry on any self-care. Totally confined to bed or chair	0	0	0	0	0	0	0	0	0	0	0	0	0	0	0	0
Total follow-up time among ALL patients (months)c
Mean (SD)	27.46	25.95	23.42	15.84	23.13	16.64	22.94	18.44	40.61	40.79	26.64	22.83	22.37	22.26	24.9	20.54
Median	20.03		21.07		20.83		18.38		28.2		19.9		10.48		15.67
IQR (Q1, Q3)	9.8	33.1	13.03	29.4	10.53	29.1	8.43	34	10.38	55.15	8.07	32.23	7.5	33.72	12.08	30.18
Range (minimum, maximum)	0.03	132.57	1.87	86.27	0.03	78.57	3.6	66.93	1.53	132.57	1.53	82.47	3.17	95.33	6.73	70.27
Total follow-up time among patients who died during the follow-up period (months)c (n,%)a	157	77.34	35	77.78	28	80	15	83.33	32	72.73	16	64	15	75	16	100
n (%)
Mean (SD)	23.81	24.14	23.34	17.5	20.47	17.35	19.64	17.75	34.95	37.62	16.67	16.22	18.01	23.8	24.9	20.54
Median	16.8		19		18.13		11.17		21.42		13.88		8.97		15.67
IQR (Q1, Q3)	8.9	28.07	10.9	29.63	9.87	24.63	7.8	26.9	9.28	44.88	6.37	19.9	7.2	21.57	12.08	30.18
Range (minimum, maximum)	0.03	130.7	1.87	86.27	0.03	78.57	3.6	66.93	1.53	130.7	1.53	69.7	3.17	95.33	6.73	70.27
Cause of death (n,%) (among those who died during the follow-up period)
STS related	148	94.27	34	97.14	23	82.14	15	100	31	96.88	14	87.5	15	100	16	100
nonSTS related	6	3.82	0	0	3	10.71	0	0	1	3.13	2	12.5	0	0	0	0
Don't know	3	1.91	1	2.86	2	7.14	0	0	0	0	0	0	0	0	0	0
Total follow-up time among patients alive at the end of the follow-up period (months) (n,%)a	35	17.24	6	13.33	6	17.14	3	16.67	8	18.18	7	28	5	25	0	0
n (%)
Mean (SD)	39.92	28.23	23.69	8.31	33.79	6.98	39.41	13.92	55.69	46.62	44.36	22.75	35.43	9.31
Median	33.25		22.07		33.4		44.63		40.35		33.67		34.33
IQR (Q1, Q3)	23.33	44.63	19.9	24.8	31.2	34.6	23.63	49.97	22.7	89.08	31.27	67.6	33.1	40.9
Range (minimum, maximum)	5.17	132.57	10.07	39	23.33	46.97	23.63	49.97	5.17	132.57	20.33	82.47	22	46.83
a Note, for 11 patients it was unknown if the patient was currently alive.
b Because the objective of the CCI score was to evaluate underlying comorbidity burden independent of STS, ICD-9-CM diagnosis codes for cancer were excluded from the CCI calculation for this study.
c Follow-up time calculated as the number of months between the first diagnosis of advanced STS and the earliest of death or end of the chart abstraction
AIDS = acquired immune deficiency syndrome; CCI = Charlson Comorbidity Index; HIV = human immunodeficiency virus; IQR = interquartile range; PS = Performance Status; SD = standard deviation; STS = soft tissue sarcoma.

## Sheet: Characteristics (Germany)
Table B-4. Characteristics of Patients with a Diagnosis of Advanced Soft Tissue Sarcoma: Germany
Characteristic	Total		Leiomyosarcomas		Others / NOS		Fibroblastic/Myofibroblastic		Liposarcomas		Vascular sarcomas		Rhabdomyosarcomas		Synovial sarcoma
	N	%	N	%	N	%	N	%	N	%	N	%	N	%	N	%
	204	100	66	100	43	100	20	100	22	100	17	100	21	100	15	100
Histological Subtype classification
Leiomyosarcomas	66	32.3529	---	---	---	---	---	---	---	---	---	---	---	---	---	---
Others / NOS	43	21.0784	---	---	---	---	---	---	---	---	---	---	---	---	---	---
Fibroblastic/Myofibroblastic	20	9.80392	---	---	---	---	---	---	---	---	---	---	---	---	---	---
Liposarcomas	22	10.7843	---	---	---	---	---	---	---	---	---	---	---	---	---	---
Vascular sarcomas	17	8.33333	---	---	---	---	---	---	---	---	---	---	---	---	---	---
Rhabdomyosarcomas	21	10.2941	---	---	---	---	---	---	---	---	---	---	---	---	---	---
Synovial sarcoma	15	7.35294	---	---	---	---	---	---	---	---	---	---	---	---	---	---
Sex
Male	130	63.73	33	50	31	72.09	10	50	14	63.64	13	76.47	16	76.19	13	86.67
Female	74	36.27	33	50	12	27.91	10	50	8	36.36	4	23.53	5	23.81	2	13.33
Ethnic Origin
White/Caucasian	183	89.71	58	87.88	42	97.67	17	85	20	90.91	13	76.47	19	90.48	14	93.33
African/black	4	1.96	2	3.03	0	0	1	5	0	0	0	0	0	0	1	6.67
Asian or Pacific Islander	8	3.92	3	4.55	0	0	1	5	2	9.09	2	11.76	0	0	0	0
Middle Eastern	4	1.96	1	1.52	0	0	1	5	0	0	1	5.88	1	4.76	0	0
Indian Subcontinent	5	2.45	2	3.03	1	2.33	0	0	0	0	1	5.88	1	4.76	0	0
Supplemental private insurance
Yes	11	5.39	4	6.06	1	2.33	2	10	1	4.55	0	0	3	14.29	0	0
No	188	92.16	60	90.91	41	95.35	16	80	21	95.45	17	100	18	85.71	15	100
Don't know	5	2.45	2	3.03	1	2.33	2	10	0	0	0	0	0	0	0	0
Stage of disease at initial diagnosis
1A	0	0	0	0	0	0	0	0	0	0	0	0	0	0	0	0
1B	6	2.94	4	6.06	0	0	1	5	0	0	1	5.88	0	0	0	0
IIA	3	1.47	1	1.52	2	4.65	0	0	0	0	0	0	0	0	0	0
IIB	13	6.37	9	13.64	3	6.98	0	0	0	0	1	5.88	0	0	0	0
III (with no regional lymph node metastasis)	9	4.41	2	3.03	0	0	2	10	2	9.09	1	5.88	0	0	2	13.33
III (with regional lymph node metastasis)	16	7.84	7	10.61	3	6.98	2	10	2	9.09	1	5.88	0	0	1	6.67
IV	157	76.96	43	65.15	35	81.4	15	75	18	81.82	13	76.47	21	100	12	80
Histological subtype
Adipoctic tumors	22	10.78	0	0	0	0	0	0	22	100	0	0	0	0	0	0
Angiosarcoma	15	7.35	0	0	0	0	0	0	0	0	15	88.24	0	0	0	0
Chondro-osssesous tumors	2	0.98	0	0	2	4.65	0	0	0	0	0	0	0	0	0	0
Fibroblastic/myofibroblastic tumor	20	9.8	0	0	0	0	20	100	0	0	0	0	0	0	0	0
Fibrohystiocytic tumor	7	3.43	0	0	7	16.28	0	0	0	0	0	0	0	0	0	0
Seketal muscle tumor	21	10.29	0	0	0	0	0	0	0	0	0	0	21	100	0	0
Smooth muscle tumor	50	24.51	50	75.76	0	0	0	0	0	0	0	0	0	0	0	0
Pericytic (perivascular) tumor	0	0	0	0	0	0	0	0	0	0	0	0	0	0	0	0
Vascular tumor of the soft tissue	2	0.98	0	0	0	0	0	0	0	0	2	11.76	0	0	0	0
Nerve sheath tumor	1	0.49	0	0	1	2.33	0	0	0	0	0	0	0	0	0	0
Synovial sarcoma	15	7.35	0	0	0	0	0	0	0	0	0	0	0	0	15	100
Tumor of uncertian differentiation	12	5.88	0	0	12	27.91	0	0	0	0	0	0	0	0	0	0
Uterine leiomyosarcoma	16	7.84	16	24.24	0	0	0	0	0	0	0	0	0	0	0	0
undifferentiated/unclassified sarcoma	21	10.29	0	0	21	48.84	0	0	0	0	0	0	0	0	0	0
Don't know	0	0	0	0	0	0	0	0	0	0	0	0	0	0	0	0
Number of patients where initial diagnosis was not advanced staged	27	13.2353	16	24.2424	6	13.9535	2	10	1	4.54545	2	11.7647	0	0	0	0
Treatment received during time from initial diagnosis to diagnosis of advanced stage (among patients with initially non-advanced stage disease)
Neoadjuvant therapy	0	0	0	0	0	0	0	0	0	0	0	0	0	0	0	0
Adjuvant therapy	0	0	0	0	0	0	0	0	0	0	0	0	0	0	0	0
Radiotherapy	10	37.037	6	37.5	4	66.6667	0	0	0	0	0	0	0	0	0	0
Surgery	22	81.4815	14	87.5	5	83.3333	1	50	0	0	2	100	0	0	0	0
Received radiation to the mediastinal/pericardial area	0	0	0	0	0	0	0	0	0	0	0	0	0	0	0	0
Time from initial diagnosis to advanced diagnosis (months)	27	13.2353	16	24.2424	6	13.9535	2	10	1	4.54545	2	11.7647	0	0	0	0
Mean (SD)	22.79	22.77	20.67	18.75	27.92	29.85	21.37	30.08	0.27	---	37.08	41.18	---	---	---	---
Median	10.4		10.93		16.03		21.37		0.27		37.08		---	---	---	---
IQR (Q1, Q3)	5.9	42.63	7.03	36.43	5.87	62.47	0.1	42.63	0.27	0.27	7.97	66.2	---	---	---	---
Range (minimum, maximum)	0.1	66.9	0.2	60.87	0.2	66.9	0.1	42.63	0.27	0.27	7.97	66.2	---	---	---	---
Age at advanced diagnosis
Mean (SD)	57.38	11.02	57.53	11.07	56.3	12.11	56.15	8.65	59.55	10.82	59.53	10.62	58.1	12.45	54.8	9.94
Median	58		59.5		59		56		61.5		59		61		54
IQR (Q1, Q3)	50	67	48	68	45	67	50	61.5	52	68	54	66	51	66	47	58
Range (minimum, maximum)	28	77	30	77	31	73	42	73	28	73	31	76	34	76	37	74
Distribution
18-24	0	0	0	0	0	0	0	0	0	0	0	0	0	0	0	0
25-34	6	2.94	1	1.52	2	4.65	0	0	1	4.55	1	5.88	1	4.76	0	0
35-44	24	11.76	10	15.15	8	18.6	2	10	0	0	0	0	3	14.29	1	6.67
45-54	50	24.51	16	24.24	5	11.63	8	40	7	31.82	4	23.53	3	14.29	7	46.67
55-64	54	26.47	16	24.24	12	27.91	7	35	4	18.18	6	35.29	5	23.81	4	26.67
65-69	41	20.098	13	19.697	12	27.907	1	5	6	27.2727	3	17.6471	5	23.8095	1	6.66667
70-74	26	12.7451	9	13.6364	4	9.30233	2	10	4	18.1818	2	11.7647	3	14.2857	2	13.3333
75+	3	1.47	1	1.52	0	0	0	0	0	0	1	5.88	1	4.76	0	0
Facility where treatment was received for advanced STS
Cancer center	92	45.1	35	53.03	17	39.53	13	65	10	45.45	6	35.29	8	38.1	3	20
Academic/teaching hospital	108	52.94	29	43.94	25	58.14	7	35	11	50	11	64.71	13	61.9	12	80
Other public non-teaching hospital	0	0	0	0	0	0	0	0	0	0	0	0	0	0	0	0
Private hospital or clinic	4	1.96	2	3.03	1	2.33	0	0	1	4.55	0	0	0	0	0	0
Military hospital	0	0	0	0	0	0	0	0	0	0	0	0	0	0	0	0
Other	0	0	0	0	0	0	0	0	0	0	0	0	0	0	0	0
Weight in Kg at time of advanced diagnosis (known weight information)	174	100	51	100	39	100	18	100	19	100	14	100	20	100	13	100
Mean (SD)	71.84	9.27	69.98	9.44	73.85	10.06	71.17	8.84	73	8.57	71.5	10.07	70.9	7.53	74.15	9.48
Median	71		70		72		69.5		71		71		71		76
IQR (Q1, Q3)	65	78	63	78	67	81	66	73	67	80	63	78	69	76.5	69	81
Range (minimum, maximum)	52	105	52	90	56	105	58	92	60	92	57	90	52	82	59	88
Body surface area at time of advanced diagnosis (known BSA information)	174	100	51	100	39	100	18	100	19	100	14	100	20	100	13	100
Mean (SD)	1.86	0.15	1.83	0.17	1.89	0.16	1.84	0.14	1.88	0.13	1.84	0.16	1.85	0.13	1.9	0.15
Median	1.86		1.83		1.88		1.82		1.86		1.83		1.87		1.92
IQR (Q1, Q3)	1.74	1.97	1.68	1.97	1.76	2	1.74	1.91	1.78	1.97	1.71	1.96	1.83	1.94	1.82	2.01
Range (minimum, maximum)	1.47	2.3	1.48	2.18	1.57	2.3	1.64	2.15	1.7	2.15	1.59	2.13	1.47	2.01	1.66	2.08
Charlson Comorbidity Index (CCI) score at time of diagnosis of advanced STSb
Mean (SD)	1.02	1.06	1.05	1.04	1.05	1.21	0.9	0.97	0.95	0.9	1.12	1.11	1	1.05	1	1.13
Median	1		1		1		1		1		1		1		1
IQR (Q1, Q3)	0	2	0	2	0	2	0	2	0	2	0	2	0	2	0	2
Range (minimum, maximum)	0	6	0	4	0	6	0	3	0	3	0	3	0	3	0	3
Distribution
0	79	38.73	24	36.36	16	37.21	9	45	8	36.36	6	35.29	9	42.86	7	46.67
1	66	32.35	23	34.85	16	37.21	5	25	8	36.36	6	35.29	5	23.81	3	20
2	41	20.1	13	19.7	8	18.6	5	25	5	22.73	2	11.76	5	23.81	3	20
3+	18	8.82	6	9.09	3	6.98	1	5	1	4.55	3	17.65	2	9.52	2	13.33
CCI conditions at time of diagnosis of advanced STSb
Cerebrovascular disease	6	2.94	2	3.03	2	4.65	1	5	1	4.55	0	0	0	0	0	0
Chronic pulmonary disease	11	5.39	0	0	2	4.65	1	5	3	13.64	3	17.65	2	9.52	0	0
Congestive heart failure	4	1.96	0	0	0	0	1	5	0	0	1	5.88	1	4.76	1	6.67
Dementia	0	0	0	0	0	0	0	0	0	0	0	0	0	0	0	0
Depression	29	14.22	14	21.21	3	6.98	3	15	1	4.55	1	5.88	4	19.05	3	20
Diabetes w/complications	6	2.94	3	4.55	1	2.33	0	0	0	0	1	5.88	1	4.76	0	0
Diabetes without complications	30	14.71	10	15.15	3	6.98	3	15	5	22.73	4	23.53	2	9.52	3	20
Hemiplegia or paraplegia	0	0	0	0	0	0	0	0	0	0	0	0	0	0	0	0
HIV/AIDS	1	0.49	0	0	1	2.33	0	0	0	0	0	0	0	0	0	0
Hypertension	74	36.27	26	39.39	16	37.21	8	40	5	22.73	5	29.41	8	38.1	6	40
Mild liver disease	6	2.94	1	1.52	1	2.33	0	0	1	4.55	2	11.76	0	0	1	6.67
Moderate-to-severe liver disease	0	0	0	0	0	0	0	0	0	0	0	0	0	0	0	0
Myocardial infarction	3	1.47	2	3.03	1	2.33	0	0	0	0	0	0	0	0	0	0
Peptic ulcer disease	9	4.41	1	1.52	5	11.63	0	0	0	0	1	5.88	2	9.52	0	0
Peripheral vascular disease	3	1.47	1	1.52	1	2.33	0	0	0	0	0	0	0	0	1	6.67
Renal disease	3	1.47	0	0	1	2.33	0	0	2	9.09	0	0	0	0	0	0
Rheumatic disease	9	4.41	6	9.09	1	2.33	1	5	1	4.55	0	0	0	0	0	0
Skin ulcers/cellulitis	0	0	0	0	0	0	0	0	0	0	0	0	0	0	0	0
Grade of cancer at time of advanced diagnosis of STS (Known grade of cancer)	71	100	26	100	13	100	6	100	8	100	4	100	9	100	5	100
G1	1	1.41	0	0	0	0	0	0	1	12.5	0	0	0	0	0	0
G2	28	39.44	8	30.77	6	46.15	2	33.33	3	37.5	2	50	3	33.33	4	80
G3	42	59.15	18	69.23	7	53.85	4	66.67	4	50	2	50	6	66.67	1	20
Don't know	0	0	0	0	0	0	0	0	0	0	0	0	0	0	0	0
Size of the primary tumor at the time of advanced diagnosis of STS
≤ 5 cm	43	21.08	13	19.7	4	9.3	6	30	4	18.18	6	35.29	6	28.57	4	26.67
> 5 cm	150	73.53	49	74.24	36	83.72	11	55	18	81.82	11	64.71	14	66.67	11	73.33
Don't know	11	5.39	4	6.06	3	6.98	3	15	0	0	0	0	1	4.76	0	0
Depth of the primary tumor at the time of advance diagnosis of STS
Superficial	16	7.84	1	1.52	3	6.98	2	10	3	13.64	1	5.88	3	14.29	3	20
Deep	170	83.33	57	86.36	36	83.72	16	80	18	81.82	15	88.24	16	76.19	12	80
Don't know	18	8.82	8	12.12	4	9.3	2	10	1	4.55	1	5.88	2	9.52	0	0
Anatomic location of primary tumor at the time of advanced diagnosis of STS
Axilla	3	1.47	0	0	0	0	0	0	0	0	0	0	0	0	3	20
Breast	4	1.96	0	0	0	0	0	0	3	13.64	0	0	1	4.76	0	0
Lower extremity	53	25.98	14	21.21	6	13.95	9	45	5	22.73	6	35.29	10	47.62	3	20
Upper extremity	28	13.73	4	6.06	9	20.93	3	15	4	18.18	3	17.65	2	9.52	3	20
Head or neck	14	6.86	2	3.03	2	4.65	0	0	0	0	6	35.29	3	14.29	1	6.67
Gastrointestinal	12	5.88	7	10.61	3	6.98	1	5	1	4.55	0	0	0	0	0	0
Genitourinary	2	0.98	0	0	1	2.33	0	0	1	4.55	0	0	0	0	0	0
Gynecologic (other than uterus)	3	1.47	0	0	1	2.33	2	10	0	0	0	0	0	0	0	0
Mediastinum, lung, or pleura	7	3.43	0	0	4	9.3	0	0	1	4.55	2	11.76	0	0	0	0
Pelvis (nonvisceral)	17	8.33	7	10.61	4	9.3	2	10	2	9.09	0	0	2	9.52	0	0
Retroperitoneal	27	13.24	12	18.18	7	16.28	2	10	3	13.64	0	0	2	9.52	1	6.67
Trunk	18	8.82	4	6.06	6	13.95	1	5	2	9.09	0	0	1	4.76	4	26.67
Uterus	16	7.84	16	24.24	0	0	0	0	0	0	0	0	0	0	0	0
Don't know	0	0	0	0	0	0	0	0	0	0	0	0	0	0	0	0
Site of metastasis among patients with distant metastsis at the time of diagnosis of advanced STS (n,%)
Bone	28	15.56	7	13.21	8	19.51	4	23.53	1	5	1	6.67	4	19.05	3	23.08
Brain	2	1.11	1	1.89	1	2.44	0	0	0	0	0	0	0	0	0	0
Distant lymph nodes	51	28.33	19	35.85	7	17.07	4	23.53	5	25	4	26.67	7	33.33	5	38.46
Exoskeletal	9	5	5	9.43	1	2.44	1	5.88	1	5	1	6.67	0	0	0	0
Exoskeletal	9	5	5	9.43	1	2.44	1	5.88	1	5	1	6.67	0	0	0	0
Liver	56	31.11	15	28.3	11	26.83	7	41.18	8	40	7	46.67	5	23.81	3	23.08
Lung	125	69.44	35	66.04	34	82.93	9	52.94	17	85	6	40	13	61.9	11	84.62
Mediastinum	8	4.44	2	3.77	4	9.76	0	0	1	5	0	0	1	4.76	0	0
Pericardium	3	1.67	0	0	2	4.88	0	0	0	0	0	0	1	4.76	0	0
Peritoneum	30	16.67	6	11.32	9	21.95	2	11.76	5	25	3	20	4	19.05	1	7.69
Pleura	9	5	2	3.77	4	9.76	0	0	0	0	1	6.67	2	9.52	0	0
Retroperitoneum	5	2.78	3	5.66	1	2.44	0	0	0	0	1	6.67	0	0	0	0
Other	0	0	0	0	0	0	0	0	0	0	0	0	0	0	0	0
Don't know	0	0	0	0	0	0	0	0	0	0	0	0	0	0	0	0
PS at diagnosis of or progression to advanced STS
PS measured on the ECOG scale
Mean (SD)	1.12	0.53	1.15	0.53	1.16	0.53	0.85	0.59	1.18	0.5	1.24	0.44	1.05	0.5	1.07	0.59
Median	1		1		1		1		1		1		1		1
IQR (Q1, Q3)	1	1	1	1	1	1	0.5	1	1	1	1	1	1	1	1	1
Range (minimum, maximum)	0	2	0	2	0	2	0	2	0	2	1	2	0	2	0	2
Distribution
0=Fully active, able to carry on all pre-disease performance without restriction	18	8.82	5	7.58	3	6.98	5	25	1	4.55	0	0	2	9.52	2	13.33
1=Restricted in physically strenuous activity but ambulatory and able to carry out work of a light or sedentary nature, e.g., light house work, office work	144	70.59	46	69.7	30	69.77	13	65	16	72.73	13	76.47	16	76.19	10	66.67
2=Ambulatory and capable of all self-care but unable to carry out any work activities. Up and about more than 50% of waking hours	42	20.59	15	22.73	10	23.26	2	10	5	22.73	4	23.53	3	14.29	3	20
3=Capable of only limited self-care, confined to bed or chair more than 50% of waking hours	0	0	0	0	0	0	0	0	0	0	0	0	0	0	0	0
4=Completely disabled. Cannot carry on any self-care. Totally confined to bed or chair	0	0	0	0	0	0	0	0	0	0	0	0	0	0	0	0
Total follow-up time among ALL patients (months)c
Mean (SD)	18.48	14.69	21.59	15.78	18.3	17.69	20.68	13.61	13.55	8.31	16.87	17.82	16.9	9.02	13.69	8.75
Median	14.9		21.23		12.2		14.75		12.62		10.9		15.4		11.03
IQR (Q1, Q3)	9	24.65	9.5	28.03	7.63	24.23	11.02	26.7	4.87	19.63	5.3	21.3	10.13	22.2	7.83	20.6
Range (minimum, maximum)	1.4	95.13	1.7	76.73	3.07	95.13	6.83	65.37	1.63	29	3.07	76.57	1.4	31.77	1.9	28.57
Total follow-up time among patients who died during the follow-up period (months) (n,%)a	139	68.14	42	63.64	34	79.07	12	60	15	68.18	12	70.59	13	61.9	11	73.33
n (%)
Mean (SD)	14.05	12.68	16.67	14.53	14.73	13.94	13.83	7.09	10.35	6.02	14.6	20.02	11.14	5.35	10.15	7.09
Median	11.03		12.73		11.03		11.17		11.87		10		11.03		9.87
IQR (Q1, Q3)	6.9	15.7	7.57	21.03	6.9	15	10.37	13.58	4.77	13.83	4.85	14.65	8.8	14.87	2.9	13.73
Range (minimum, maximum)	1.4	76.73	1.7	76.73	3.07	73.83	6.83	31.7	1.63	21.07	3.07	76.57	1.4	21	1.9	26.33
Cause of death (n,%) (among those who died during the follow-up period)	139	100	42	100	34	100	12	100	15	100	12	100	13	100	11	100
STS related	131	94.24	38	90.48	33	97.06	11	91.67	15	100	11	91.67	12	92.31	11	100
nonSTS related	6	4.32	3	7.14	0	0	1	8.33	0	0	1	8.33	1	7.69	0	0
Don't know	2	1.44	1	2.38	1	2.94	0	0	0	0	0	0	0	0	0	0
Total follow-up time among patients alive at the end of the follow-up period (months) (n,%)a	54	26.47	22	33.33	7	16.28	7	35	4	18.18	4	23.53	7	33.33	3	20
n (%)
Mean (SD)	27.96	14.29	30.21	14.34	31.8	24.14	30.97	14.92	20.4	8.74	22.33	10.7	26.25	4.67	23.45	4.11
Median	25.23		25.87		25.43		26.7		24.2		25.63		25.15		22.77
IQR (Q1, Q3)	21.93	29.9	22.23	30.98	21.1	28.63	23.95	32.6	16.7	25.93	21.3	27.07	21.85	31.52	20.15	26.75
Range (minimum, maximum)	2.83	95.13	9.17	69	15.37	95.13	15.87	65.37	2.83	29	4.7	32.93	21.23	31.77	19.7	28.57
a Note, for 11 patients it was unknown if the patient was currently alive.
b Because the objective of the CCI score was to evaluate underlying comorbidity burden independent of STS, ICD-9-CM diagnosis codes for cancer were excluded from the CCI calculation for this study.
c Follow-up time calculated as the number of months between the first diagnosis of advanced STS and the earliest of death or end of the chart abstraction
d Patients with Stage (I,II or III) at initial diganosis and time from initial to advanced diagnosis greater than zero
AIDS = acquired immune deficiency syndrome; CCI = Charlson Comorbidity Index; HIV = human immunodeficiency virus; IQR = interquartile range; PS = Performance Status; SD = standard deviation; STS = soft tissue sarcoma.

## Sheet: Characteristics (France)
Table B-5. Characteristics of Patients with a Diagnosis of Advanced Soft Tissue Sarcoma: France
Characteristic	Total		Leiomyosarcomas		Others / NOS		Fibroblastic/Myofibroblastic		Liposarcomas		Vascular sarcomas		Rhabdomyosarcomas		Synovial sarcoma
	N	%	N	%	N	%	N	%	N	%	N	%	N	%	N	%
	201	100	57	100	65	100	16	100	25	100	21	100	12	100	5	100
Histological Subtype classification
Leiomyosarcomas	57	28.3582
Others / NOS	65	32.3383
Fibroblastic/Myofibroblastic	16	7.9602
Liposarcomas	25	12.4378
Vascular sarcomas	21	10.4478
Rhabdomyosarcomas	12	5.97015
Synovial sarcoma	5	2.48756
Sex
Male	96	47.76	15	26.32	38	58.46	11	68.75	14	56	7	33.33	8	66.67	3	60
Female	105	52.24	42	73.68	27	41.54	5	31.25	11	44	14	66.67	4	33.33	2	40
Ethnic Origin
White/Caucasian	0		0		0		0		0		0		0		0
African/black	0		0		0		0		0		0		0		0
Asian or Pacific Islander	0		0		0		0		0		0		0		0
Middle Eastern	0		0		0		0		0		0		0		0
Indian Subcontinent	0		0		0		0		0		0		0		0
Supplemental private insurance
Yes	91	45.27	28	49.12	36	55.38	6	37.5	7	28	6	28.57	5	41.67	3	60
No	74	36.82	17	29.82	21	32.31	5	31.25	14	56	11	52.38	4	33.33	2	40
Dont know	36	17.91	12	21.05	8	12.31	5	31.25	4	16	4	19.05	3	25	0	0
Stage of disease at initial diagnosis
1A	1	0.5	0	0	0	0	1	6.25	0	0	0	0	0	0	0	0
1B	3	1.49	0	0	1	1.54	0	0	0	0	0	0	2	16.67	0	0
IIA	18	8.96	7	12.28	9	13.85	0	0	1	4	1	4.76	0	0	0	0
IIB	32	15.92	7	12.28	11	16.92	4	25	5	20	3	14.29	1	8.33	1	20
III (with no regional lymph node metastasis)	19	9.45	5	8.77	2	3.08	3	18.75	4	16	1	4.76	3	25	1	20
III (with regional lymph node metastasis)	24	11.94	10	17.54	8	12.31	0	0	2	8	3	14.29	1	8.33	0	0
IV	104	51.74	28	49.12	34	52.31	8	50	13	52	13	61.9	5	41.67	3	60
Histological subtype
Adipoctic tumors	25	12.44	0	0	0	0	0	0	25	100	0	0	0	0	0	0
Angiosarcoma	20	9.95	0	0	0	0	0	0	0	0	20	95.24	0	0	0	0
Chondro-osssesous tumors	5	2.49	0	0	5	7.69	0	0	0	0	0	0	0	0	0	0
Fibroblastic/myofibroblastic tumor	16	7.96	0	0	0	0	16	100	0	0	0	0	0	0	0	0
Fibrohystiocytic tumor	6	2.99	0	0	6	9.23	0	0	0	0	0	0	0	0	0	0
Seketal muscle tumor	12	5.97	0	0	0	0	0	0	0	0	0	0	12	100	0	0
Smooth muscle tumor	23	11.44	23	40.35	0	0	0	0	0	0	0	0	0	0	0	0
Pericytic (perivascular) tumor	1	0.5	0	0	1	1.54	0	0	0	0	0	0	0	0	0	0
Vascular tumor of the soft tissue	1	0.5	0	0	0	0	0	0	0	0	1	4.76	0	0	0	0
Nerve sheath tumor	11	5.47	0	0	11	16.92	0	0	0	0	0	0	0	0	0	0
Synovial sarcoma	5	2.49	0	0	0	0	0	0	0	0	0	0	0	0	5	100
Tumor of uncertian differentiation	7	3.48	0	0	7	10.77	0	0	0	0	0	0	0	0	0	0
Uterine leiomyosarcoma	34	16.92	34	59.65	0	0	0	0	0	0	0	0	0	0	0	0
undifferentiated/unclassified sarcoma	35	17.41	0	0	35	53.85	0	0	0	0	0	0	0	0	0	0
Dont know	0	0	0	0	0	0	0	0	0	0	0	0	0	0	0	0
Number of patients where initial diagnosis was not advanced staged	82	40.796	25	43.8596	24	36.9231	8	50	10	40	7	33.3333	6	50	2	40
Treatment received during time from initial diagnosis to diagnosis of advanced stage (among patients with initially non-advanced stage disease)
Neoadjuvant therapy	8	9.7561	2	8	3	12.5	0	0	0	0	1	14.2857	2	33.3333	0	0
Adjuvant therapy	9	10.9756	3	12	2	8.33333	0	0	1	10	1	14.2857	2	33.3333	0	0
Radiotherapy	23	28.0488	8	32	11	45.8333	1	12.5	1	10	0	0	2	33.3333	0	0
Surgery	31	37.8049	9	36	13	54.1667	3	37.5	2	20	2	28.5714	2	33.3333	0	0
Received radiation to the mediastinal/pericardial area	0	0	0	0	0	0	0	0	0	0	0	0	0	0	0	0
Time from initial diagnosis to advanced diagnosis (months)	82	40.796	25	43.8596	24	36.9231	8	50	10	40	7	33.3333	6	50	2	40
Mean (SD)	25.55	22.98	22.48	22.57	34.54	26.31	17.35	13.91	26.13	18.87	14.42	11.94	13.52	14.82	60.87	34.46
Median	17.28		16.93		27.13		11.02		16.9		13.1		8.5		60.87
IQR (Q1, Q3)	8.47	36.5	5.13	29.83	13.2	49.77	6.7	30.23	14.83	35.33	4.2	26.6	5.03	17.3	36.5	85.23
Range (minimum, maximum)	0.47	98.93	2.8	93.83	0.93	98.93	4.37	38.57	8.47	67.23	1.1	33.6	0.47	41.33	36.5	85.23
Age at advanced diagnosis
Mean (SD)	57.94	12.63	60.14	9.26	55.35	14.12	55	12.71	62.72	12.51	59.9	13.01	58.83	10.12	41.6	14.36
Median	59		61		56		53		64		59		61		38
IQR (Q1, Q3)	50	67	53	67	46	65	43	67	55	70	52	71	55.5	65	31	50
Range (minimum, maximum)	22	84	35	79	22	83	38	75	38	84	36	84	34	70	27	62
Distribution
18-24	2	0.995025	0	0	2	3.07692	0	0	0	0	0	0	0	0	0	0
25-34	6	2.98507	0	0	3	4.61538	0	0	0	0	0	0	1	8.33333	2	40
35-44	24	11.9403	2	3.50877	10	15.3846	5	31.25	2	8	4	19.0476	0	0	1	20
45-54	42	20.8955	15	26.3158	14	21.5385	4	25	4	16	2	9.52381	2	16.6667	1	20
55-64	62	30.8458	21	36.8421	18	27.6923	2	12.5	7	28	7	33.3333	6	50	1	20
65-69	27	13.4328	8	14.0351	8	12.3077	2	12.5	5	20	2	9.52381	2	16.6667	0	0
70-74	23	11.4428	9	15.7895	4	6.15385	2	12.5	3	12	4	19.0476	1	8.33333	0	0
75+	15	7.46269	2	3.50877	6	9.23077	1	6.25	4	16	2	9.52381	0	0	0	0
Facility where treatment was received for advanced STS
Specialized cancer hospital (CLCC)	75	37.31	16	28.07	26	40	6	37.5	10	40	11	52.38	5	41.67	1	20
University or regional hospital (CHU/CHR)	79	39.3	25	43.86	26	40	5	31.25	7	28	8	38.1	5	41.67	3	60
General hospital (CHG/CH)	33	16.42	12	21.05	11	16.92	3	18.75	3	12	2	9.52	2	16.67	0	0
Private hospitals or clinic (centre privé)	14	6.97	4	7.02	2	3.08	2	12.5	5	20	0	0	0	0	1	20
Military hospital (hôpital militaire)	0	0	0	0	0	0	0	0	0	0	0	0	0	0	0	0
Other	0	0	0	0	0	0	0	0	0	0	0	0	0	0	0	0
Weight in Kg at time of advanced diagnosis (known weight information)	179	100	50	100	58	100	14	100	25	100	21	100	8	100	3	100
Mean (SD)	70.28	13.7	65	9.82	71.07	14.35	76.29	16.43	71.28	15.56	74.67	14.77	74.38	8.07	65	11.14
Median	69		65		70		77.5		70		80		72		67
IQR (Q1, Q3)	60	78	58	71	61	80	64	84	62	75	60	82	69	79	53	75
Range (minimum, maximum)	45	116	50	95	45	116	55	110	48	107	48	110	65	90	53	75
Body surface area at time of advanced diagnosis (known BSA information)	178	100	50	100	57	100	14	100	25	100	21	100	8	100	3	100
Mean (SD)	1.81	0.2	1.73	0.15	1.82	0.21	1.91	0.24	1.84	0.23	1.86	0.21	1.89	0.13	1.73	0.18
Median	1.8		1.72		1.82		1.93		1.83		1.92		1.88		1.72
IQR (Q1, Q3)	1.66	1.94	1.61	1.82	1.69	1.94	1.72	2.09	1.71	1.94	1.66	1.99	1.8	1.97	1.56	1.93
Range (minimum, maximum)	1.41	2.46	1.46	2.07	1.41	2.46	1.57	2.28	1.47	2.25	1.52	2.35	1.74	2.12	1.56	1.93
Charlson Comorbidity Index (CCI) score at time of diagnosis of advanced STS
Mean (SD)	0.8	1.17	0.68	0.97	0.52	0.89	0.56	1.09	1.36	1.29	1.29	1.62	1.17	1.8	0.8	1.3
Median	0		0		0		0		1		0		0.5		0
IQR (Q1, Q3)	0	1	0	1	0	1	0	1	0	2	0	2	0	1.5	0	1
Range (minimum, maximum)	0	6	0	5	0	4	0	4	0	4	0	4	0	6	0	3
Distribution
0	114	56.72	31	54.39	44	67.69	11	68.75	8	32	11	52.38	6	50	3	60
1	44	21.89	17	29.82	11	16.92	3	18.75	7	28	2	9.52	3	25	1	20
2	25	12.44	7	12.28	8	12.31	1	6.25	5	20	3	14.29	1	8.33	0	0
3+	18	8.96	2	3.51	2	3.08	1	6.25	5	20	5	23.81	2	16.67	1	20
CCI conditions at time of diagnosis of advanced STSb
Cerebrovascular disease	3	1.49	0	0	1	1.54	0	0	1	4	1	4.76	0	0	0	0
Chronic pulmonary disease	14	6.97	2	3.51	4	6.15	3	18.75	5	20	0	0	0	0	0	0
Congestive heart failure	6	2.99	2	3.51	1	1.54	0	0	1	4	0	0	2	16.67	0	0
Dementia	3	1.49	1	1.75	1	1.54	0	0	1	4	0	0	0	0	0	0
Depression	19	9.45	8	14.04	4	6.15	0	0	3	12	1	4.76	2	16.67	1	20
Diabetes w/complications	11	5.47	1	1.75	1	1.54	1	6.25	3	12	3	14.29	2	16.67	0	0
Diabetes without complications	12	5.97	4	7.02	4	6.15	0	0	1	4	3	14.29	0	0	0	0
Hemiplegia or paraplegia	0	0	0	0	0	0	0	0	0	0	0	0	0	0	0	0
HIV/AIDS	0	0	0	0	0	0	0	0	0	0	0	0	0	0	0	0
Hypertension	58	28.86	18	31.58	15	23.08	3	18.75	11	44	8	38.1	3	25	0	0
Mild liver disease	1	0.5	0	0	0	0	0	0	0	0	1	4.76	0	0	0	0
Moderate-to-severe liver disease	1	0.5	0	0	0	0	0	0	0	0	0	0	0	0	1	20
Myocardial infarction	4	1.99	0	0	0	0	1	6.25	1	4	1	4.76	1	8.33	0	0
Peptic ulcer disease	1	0.5	0	0	0	0	0	0	1	4	0	0	0	0	0	0
Peripheral vascular disease	4	1.99	0	0	2	3.08	0	0	1	4	1	4.76	0	0	0	0
Renal disease	2	1	0	0	0	0	0	0	1	4	1	4.76	0	0	0	0
Rheumatic disease	1	0.5	0	0	0	0	0	0	0	0	1	4.76	0	0	0	0
Skin ulcers/cellulitis	3	1.49	1	1.75	0	0	0	0	0	0	1	4.76	1	8.33	0	0
Grade of cancer at time of advanced diagnosis of STS (Known grade of cancer)	154	100	35	100	57	100	14	100	20	100	16	100	9	100	3	100
G1	11	7.14	3	8.57	3	5.26	3	21.43	1	5	0	0	1	11.11	0	0
G2	38	24.68	8	22.86	9	15.79	6	42.86	7	35	5	31.25	2	22.22	1	33.33
G3	100	64.94	23	65.71	43	75.44	5	35.71	11	55	10	62.5	6	66.67	2	66.67
Don't know	5	3.25	1	2.86	2	3.51	0	0	1	5	1	6.25	0	0	0	0
Size of the primary tumor at the time of advanced diagnosis of STS
≤ 5 cm	55	27.36	19	33.33	16	24.62	4	25	1	4	9	42.86	3	25	3	60
> 5 cm	136	67.66	36	63.16	45	69.23	11	68.75	24	96	9	42.86	9	75	2	40
Don't know	10	4.98	2	3.51	4	6.15	1	6.25	0	0	3	14.29	0	0	0	0
Depth of the primary tumor at the time of advance diagnosis of STS
Superficial	18	8.96	3	5.26	8	12.31	0	0	1	4	3	14.29	2	16.67	1	20
Deep	160	79.6	46	80.7	50	76.92	14	87.5	20	80	17	80.95	10	83.33	3	60
Don't know	23	11.44	8	14.04	7	10.77	2	12.5	4	16	1	4.76	0	0	1	20
Anatomic location of primary tumor at the time of advanced diagnosis of STS
Axilla	2	1	0	0	0	0	0	0	1	4	1	4.76	0	0	0	0
Breast	6	2.99	0	0	1	1.54	0	0	0	0	4	19.05	1	8.33	0	0
Lower extremity	39	19.4	5	8.77	20	30.77	4	25	2	8	3	14.29	3	25	2	40
Upper extremity	14	6.97	2	3.51	7	10.77	1	6.25	0	0	0	0	4	33.33	0	0
Head or neck	7	3.48	1	1.75	4	6.15	0	0	0	0	0	0	0	0	2	40
Gastrointestinal	5	2.49	0	0	3	4.62	0	0	1	4	1	4.76	0	0	0	0
Genitourinary	4	1.99	3	5.26	0	0	1	6.25	0	0	0	0	0	0	0	0
Gynecologic (other than uterus)	3	1.49	1	1.75	2	3.08	0	0	0	0	0	0	0	0	0	0
Mediastinum, lung, or pleura	6	2.99	1	1.75	1	1.54	1	6.25	0	0	3	14.29	0	0	0	0
Pelvis (nonvisceral)	12	5.97	2	3.51	3	4.62	3	18.75	2	8	1	4.76	1	8.33	0	0
Retroperitoneal	40	19.9	6	10.53	8	12.31	4	25	18	72	2	9.52	2	16.67	0	0
Trunk	22	10.95	2	3.51	11	16.92	1	6.25	1	4	5	23.81	1	8.33	1	20
Uterus	34	16.92	34	59.65	0	0	0	0	0	0	0	0	0	0	0	0
Don't know	6	2.99	0	0	5	7.69	0	0	0	0	1	4.76	0	0	0	0
Site of metastasis among patients with distant metastsis at the time of diagnosis of advanced STS
Bone	21	15.56	3	8.82	6	14.29	2	16.67	2	11.76	4	25	2	20	2	50
Brain	3	2.22	2	5.88	0	0	0	0	0	0	0	0	1	10	0	0
Distant lymph nodes	18	13.33	6	17.65	2	4.76	2	16.67	2	11.76	3	18.75	2	20	1	25
Exoskeletal	3	2.22	1	2.94	1	2.38	1	8.33	0	0	0	0	0	0	0	0
Exoskeletal	3	2.22	1	2.94	1	2.38	1	8.33	0	0	0	0	0	0	0	0
Liver	31	22.96	7	20.59	10	23.81	0	0	1	5.88	7	43.75	3	30	3	75
Lung	106	78.52	27	79.41	35	83.33	9	75	15	88.24	9	56.25	8	80	3	75
Mediastinum	8	5.93	1	2.94	1	2.38	1	8.33	2	11.76	1	6.25	2	20	0	0
Pericardium	1	0.74	0	0	0	0	0	0	0	0	1	6.25	0	0	0	0
Peritoneum	21	15.56	6	17.65	7	16.67	1	8.33	4	23.53	0	0	3	30	0	0
Pleura	13	9.63	1	2.94	3	7.14	3	25	1	5.88	2	12.5	3	30	0	0
Retroperitoneum	3	2.22	1	2.94	1	2.38	0	0	0	0	0	0	0	0	1	25
Other	4	2.96	1	2.94	0	0	0	0	0	0	3	18.75	0	0	0	0
Don't know	0	0	0	0	0	0	0	0	0	0	0	0	0	0	0	0
PS at diagnosis of or progression to advanced STS
PS measured on the ECOG scale
Mean (SD)	1.34	0.76	1.37	0.67	1.34	0.87	1.19	0.83	1.4	0.65	1.52	0.68	1.25	0.75	0.8	0.84
Median	1		1		1		1		1		2		1		1
IQR (Q1, Q3)	1	2	1	2	1	2	0.5	2	1	2	1	2	1	2	0	1
Range (minimum, maximum)	0	4	0	3	0	4	0	2	0	2	0	3	0	2	0	2
Distribution
0=Fully active, able to carry on all pre-disease performance without restriction	28	13.93	4	7.02	13	20	4	25	2	8	1	4.76	2	16.67	2	40
1=Restricted in physically strenuous activity but ambulatory and able to carry out work of a light or sedentary nature, e.g., light house work, office work	82	40.8	30	52.63	20	30.77	5	31.25	11	44	9	42.86	5	41.67	2	40
2=Ambulatory and capable of all self-care but unable to carry out any work activities. Up and about more than 50% of waking hours	86	42.79	21	36.84	30	46.15	7	43.75	12	48	10	47.62	5	41.67	1	20
3=Capable of only limited self-care, confined to bed or chair more than 50% of waking hours	4	1.99	2	3.51	1	1.54	0	0	0	0	1	4.76	0	0	0	0
4=Completely disabled. Cannot carry on any self-care. Totally confined to bed or chair	1	0.5	0	0	1	1.54	0	0	0	0	0	0	0	0	0	0
Total follow-up time among ALL patients (months)c
Mean (SD)	29.54	24.19	30.76	23.66	31.41	28.1	31.76	15.79	28.1	24.27	19.97	15.31	23.83	19.73	45.15	32.9
Median	23.47		23.83		24.1		28.12		21.03		18.53		18.73		26.13
IQR (Q1, Q3)	12.7	39.33	18.97	40	10.23	39.77	24.32	39.45	10.87	41.37	10.1	24.37	9.68	33.18	23.27	58.87
Range (minimum, maximum)	0.87	116.87	3.8	116.87	0.87	109.63	2.23	69.3	2.2	111.53	2.87	60.33	4.97	66.8	20.47	97.03
Total follow-up time among patients who died during the follow-up period (months)c	116	57.71	21	36.84	43	66.15	8	50	19	76	16	76.19	6	50	3	60
n (%)
Mean (SD)	23.44	22.86	21.08	19.92	26.19	27.69	27.33	16.01	21.55	17.36	17.4	15.73	10.82	5.74	59.72	36.89
Median	16.05		13.77		17.37		25.67		14		11.58		9.68		58.87
IQR (Q1, Q3)	7.98	28.85	7.73	25.77	5.97	32.43	17.73	37.9	9.97	31.9	4.58	23.28	6.1	14.17	23.27	97.03
Range (minimum, maximum)	0.87	109.63	3.8	73.1	0.87	109.63	2.23	53.77	2.2	56.73	2.87	60.33	4.97	20.3	23.27	97.03
Cause of death (n,%) (among those who died during the follow-up period)
STS related	112	96.55	21	100	40	93.02	8	100	19	100	15	93.75	6	100	3	100
nonSTS related	3	2.59	0	0	2	4.65	0	0	0	0	1	6.25	0	0	0	0
Don't know	1	0.86	0	0	1	2.33	0	0	0	0	0	0	0	0	0	0
Total follow-up time among patients alive at the end of the follow-up period (months)	85	42.29	36	63.16	22	33.85	8	50	6	24	5	23.81	6	50	2	40
n (%)
Mean (SD)	37.86	23.59	36.41	24.08	41.63	26.59	36.2	15.25	48.83	32.61	28.19	11.52	36.85	20.41	23.3	4.01
Median	26.9		25.12		27.45		30.52		42.53		22.3		33.18		23.3
IQR (Q1, Q3)	21.7	43.7	21.23	42.85	24.77	49.53	26.33	41.5	25.83	49.5	19.43	36.4	19.47	50.47	20.47	26.13
Range (minimum, maximum)	18	116.87	18.93	116.87	19.17	107.07	23.6	69.3	21.03	111.53	18.53	44.27	18	66.8	20.47	26.13
b Because the objective of the CCI score was to evaluate underlying comorbidity burden independent of STS, ICD-9-CM diagnosis codes for cancer were excluded from the CCI calculation for this study.
c Follow-up time calculated as the number of months between the first diagnosis of advanced STS and the earliest of death or end of the chart abstraction
d Patients with Stage (I,II or III) at initial diganosis and time from initial to advanced diagnosis greater than zero
AIDS = acquired immune deficiency syndrome; CCI = Charlson Comorbidity Index; HIV = human immunodeficiency virus; IQR = interquartile range; PS = Performance Status; SD = standard deviation; STS = soft tissue sarcoma.

## Sheet: Tx (Overall)
Table B-6. Treatment Characteristics of Advanced Soft Tissue Sarcoma by Line of Therapy: Overall Sample
	Total						Leiomyosarcomas						Others / NOS						Fibroblastic/Myofibroblastic						Liposarcomas						Vascular sarcomas						Rhabdomyosarcomas						Synovial sarcoma
Characteristic	First line		Second line		Third line		First line		Second line		Third line		First line		Second line		Third line		First line		Second line		Third line		First line		Second line		Third line		First line		Second line		Third line		First line		Second line		Third line		First line		Second line		Third line
	N	%	N	%	N	%	N	%	N	%	N	%	N	%	N	%	N	%	N	%	N	%	N	%	N	%	N	%	N	%	N	%	N	%	N	%	N	%	N	%	N	%	N	%	N	%	N	%
Patients receiving nth-line therapy	807	100	351	100	89	100	229	100	120	100	38	100	183	100	82	100	21	100	78	100	33	100	10	100	105	100	43	100	12	100	79	100	22	100	4	100	86	100	32	100	3	100	47	100	19	100	1	100
Weight in Kg at start of therapy line (Known weight)	648	100	313	100	83	100	181	100	107	100	35	100	150	100	69	100	19	100	67	100	31	100	10	100	82	100	38	100	11	100	62	100	20	100	4	100	67	100	31	100	3	100	39	100	17	100	1	100
Mean (SD)	70.65	11.28	68.98	12.15	70.64	14.17	68.09	10.01	67.04	9.95	65.83	10.8	70.78	11.77	68.74	13.36	71.37	14.01	72.55	12.3	73.9	15.04	79.4	17.33	72	12.28	69.29	13.97	74.09	18.6	73.89	12.96	75.4	15.08	76.75	14.22	69.64	8.72	67.32	8.37	72.67	12.66	72.56	9.89	67.88	7.47	69
Median	70		69		68		68		68		65		70		68		70		71		70		80		70		68.5		70		72.5		76		82.5		70		68		68		72		69		69
IQR (Q1, Q3)	64	77	60	75	60	80	61	74	60	73	60	75	64	78	59	75	60	75	65	77	63	81	64	87	65	78	60	77	59	93	65	82	67	85	67.5	86	65	74	61	72	63	87	65	80	66	73	69	69
(min, max)	42	118	42	119	43	110	45	95	48	89	43	91	42	116	46	112	50	110	46	118	48	119	55	106	48	113.8	42	107	49	106	48	110	48	110	56	86	50	95	50	88	63	87	53	102	49	78	69	69
Body surface area at start of therapy line (Known BSA)	601	100	296	100	81	100	167	100	101	100	35	100	137	100	66	100	18	100	59	100	26	100	9	100	78	100	38	100	11	100	60	100	19	100	4	100	63	100	29	100	3	100	37	100	17	100	1	100
Mean (SD)	1.82	0.17	1.8	0.18	1.82	0.2	1.78	0.16	1.77	0.17	1.76	0.18	1.83	0.18	1.79	0.21	1.84	0.22	1.84	0.16	1.84	0.2	1.92	0.21	1.85	0.18	1.81	0.2	1.87	0.25	1.86	0.2	1.89	0.22	1.9	0.2	1.82	0.14	1.79	0.14	1.86	0.14	1.87	0.15	1.8	0.12	1.82
Median	1.83		1.8		1.83		1.79		1.77		1.73		1.83		1.8		1.84		1.83		1.8		1.96		1.84		1.81		1.88		1.85		1.96		1.98		1.83		1.79		1.87		1.87		1.82		1.82
IQR (Q1, Q3)	1.71	1.94	1.67	1.91	1.66	1.96	1.67	1.91	1.65	1.87	1.65	1.89	1.72	1.94	1.62	1.88	1.7	1.9	1.74	1.93	1.71	1.96	1.73	2.04	1.72	1.95	1.67	1.93	1.65	2.16	1.73	2	1.79	2.02	1.79	2	1.72	1.91	1.7	1.88	1.71	2	1.76	1.95	1.77	1.87	1.82	1.82
(min, max)	1.37	2.46	1.34	2.42	1.37	2.4	1.37	2.18	1.45	2.16	1.37	2.09	1.38	2.46	1.45	2.42	1.48	2.4	1.46	2.33	1.43	2.28	1.6	2.23	1.47	2.42	1.34	2.23	1.48	2.22	1.47	2.35	1.47	2.36	1.6	2.02	1.47	2.18	1.44	2.01	1.71	2	1.55	2.3	1.49	1.99	1.82	1.82
Performance Status at start of therapy line
Performance Status measured on the ECOG scale
Mean (SD)	1.23	0.63	1.31	0.6	1.49	0.62	1.18	0.62	1.26	0.6	1.26	0.6	1.3	0.68	1.49	0.65	1.67	0.58	1.04	0.63	0.97	0.47	1.5	0.85	1.35	0.59	1.49	0.59	1.83	0.39	1.32	0.61	1.23	0.53	1.75	0.5	1.23	0.59	1.28	0.52	1.67	0.58	1.13	0.58	1.26	0.56	1
Median	1		1		2		1		1		1		1		1.5		2		1		1		1.5		1		2		2		1		1		2		1		1		2		1		1		1
IQR (Q1, Q3)	1	2	1	2	1	2	1	2	1	2	1	2	1	2	1	2	1	2	1	1	1	1	1	2	1	2	1	2	2	2	1	2	1	2	1.5	2	1	2	1	2	1	2	1	1	1	2	1	1
(min, max)	0	4	0	3	0	3	0	3	0	3	0	2	0	4	0	3	0	2	0	2	0	2	0	3	0	2	0	2	1	2	0	3	0	2	1	2	0	3	0	2	1	2	0	2	0	2	1	1
Distribution
0=Fully active, able to carry on all pre-disease performance without restriction	79	9.79	22	6.27	5	5.62	25	10.92	9	7.5	3	7.89	18	9.84	4	4.88	1	4.76	14	17.95	4	12.12	1	10	6	5.71	2	4.65	0	0	5	6.33	1	4.55	0	0	6	6.98	1	3.13	0	0	5	10.64	1	5.26	0	0
1=Restricted in physically strenuous activity but ambulatory	471	58.36	201	57.26	36	40.45	140	61.14	72	60	22	57.89	97	53.01	37	45.12	5	23.81	47	60.26	26	78.79	4	40	56	53.33	18	41.86	2	16.67	45	56.96	15	68.18	1	25	55	63.95	21	65.63	1	33.33	31	65.96	12	63.16	1	100
2=Ambulatory and capable of all self-care but unable to carry out any work	250	30.98	124	35.33	47	52.81	62	27.07	38	31.67	13	34.21	65	35.52	38	46.34	15	71.43	17	21.79	3	9.09	4	40	43	40.95	23	53.49	10	83.33	28	35.44	6	27.27	3	75	24	27.91	10	31.25	2	66.67	11	23.4	6	31.58	0	0
3=Capable of only limited self-care, confined to bed or chair more than 50% of waking hours	6	0.74	4	1.14	1	1.12	2	0.87	1	0.83	0	0	2	1.09	3	3.66	0	0	0	0	0	0	1	10	0	0	0	0	0	0	1	1.27	0	0	0	0	1	1.16	0	0	0	0	0	0	0	0	0	0
4=Completely disabled. Cannot carry on any self-care. Totally confined to bed or chair	1	0.12	0	0	0	0	0	0	0	0	0	0	1	0.55	0	0	0	0	0	0	0	0	0	0	0	0	0	0	0	0	0	0	0	0	0	0	0	0	0	0	0	0	0	0	0	0	0	0
Don't know	0	0	0	0	0	0	0	0	0	0	0	0	0	0	0	0	0	0	0	0	0	0	0	0	0	0	0	0	0	0	0	0	0	0	0	0	0	0	0	0	0	0	0	0	0	0	0	0
Use of cancer-directed treatments during therapy line
Overall
Chemotherapy	782	96.9021	284	80.9117	70	78.6517	223	97.3799	93	77.5	32	84.2105	177	96.7213	65	79.2683	17	80.9524	76	97.4359	30	90.9091	5	50	104	99.0476	41	95.3488	11	91.6667	78	98.7342	17	77.2727	3	75	79	91.8605	26	81.25	1	33.3333	45	95.7447	12	63.1579	1	100
Biologic therapy	0	0	0	0	0	0	0	0	0	0	0	0	0	0	0	0	0	0	0	0	0	0	0	0	0	0	0	0	0	0	0	0	0	0	0	0	0	0	0	0	0	0	0	0	0	0	0	0
Targeted therapy	26	3.22181	68	19.3732	19	21.3483	7	3.05677	28	23.3333	6	15.7895	6	3.27869	17	20.7317	4	19.0476	2	2.5641	3	9.09091	5	50	1	0.952381	2	4.65116	1	8.33333	1	1.26582	5	22.7273	1	25	7	8.13953	6	18.75	2	66.6667	2	4.25532	7	36.8421	0	0
Single class of agents
Chemotherapy only	781	96.7782	282	80.3419	70	78.6517	222	96.9432	92	76.6667	32	84.2105	177	96.7213	65	79.2683	17	80.9524	76	97.4359	30	90.9091	5	50	104	99.0476	41	95.3488	11	91.6667	78	98.7342	16	72.7273	3	75	79	91.8605	26	81.25	1	33.3333	45	95.7447	12	63.1579	1	100
Biologic therapy only	0	0	0	0	0	0	0	0	0	0	0	0	0	0	0	0	0	0	0	0	0	0	0	0	0	0	0	0	0	0	0	0	0	0	0	0	0	0	0	0	0	0	0	0	0	0	0	0
Targeted therapy only	25	3.09789	66	18.8034	19	21.3483	6	2.62009	27	22.5	6	15.7895	6	3.27869	17	20.7317	4	19.0476	2	2.5641	3	9.09091	5	50	1	0.952381	2	4.65116	1	8.33333	1	1.26582	4	18.1818	1	25	7	8.13953	6	18.75	2	66.6667	2	4.25532	7	36.8421	0	0
Combination of classes of agents
Chemotherapy + biologic therapyb	0	0	0	0	0	0	0	0	0	0	0	0	0	0	0	0	0	0	0	0	0	0	0	0	0	0	0	0	0	0	0	0	0	0	0	0	0	0	0	0	0	0	0	0	0	0	0	0
Chemotherapy + targeted therapyc	1	0.123916	2	0.569801	0	0	1	0.436681	1	0.833333	0	0	0	0	0	0	0	0	0	0	0	0	0	0	0	0	0	0	0	0	0	0	1	4.54545	0	0	0	0	0	0	0	0	0	0	0	0	0	0
Biologic therapyb + targeted therapyc	0	0	0	0	0	0	0	0	0	0	0	0	0	0	0	0	0	0	0	0	0	0	0	0	0	0	0	0	0	0	0	0	0	0	0	0	0	0	0	0	0	0	0	0	0	0	0	0
Chemotherapy + biologic therapyb + targeted therapyc	0	0	0	0	0	0	0	0	0	0	0	0	0	0	0	0	0	0	0	0	0	0	0	0	0	0	0	0	0	0	0	0	0	0	0	0	0	0	0	0	0	0	0	0	0	0	0	0
Use of selected chemotherapies during therapy line
Bevacizumab	0	0	0	0	0	0	0	0	0	0	0	0	0	0	0	0	0	0	0	0	0	0	0	0	0	0	0	0	0	0	0	0	0	0	0	0	0	0	0	0	0	0	0	0	0	0	0	0
Carboplatin	14	1.73	4	1.14	0	0	4	1.75	1	0.83	0	0	3	1.64	1	1.22	0	0	0	0	0	0	0	0	1	0.95	0	0	0	0	4	5.06	1	4.55	0	0	2	2.33	1	3.13	0	0	0	0	0	0	0	0
Cisplatin	18	2.23	5	1.42	1	1.12	2	0.87	0	0	0	0	3	1.64	4	4.88	0	0	2	2.56	0	0	0	0	3	2.86	0	0	0	0	2	2.53	0	0	1	25	4	4.65	1	3.13	0	0	2	4.26	0	0	0	0
Crizotinib	5	0.62	5	1.42	0	0	1	0.44	3	2.5	0	0	1	0.55	0	0	0	0	1	1.28	0	0	0	0	0	0	0	0	0	0	0	0	1	4.55	0	0	1	1.16	1	3.13	0	0	1	2.13	0	0	0	0
Cyclophosphamide	10	1.24	3	0.85	1	1.12	1	0.44	1	0.83	0	0	2	1.09	1	1.22	1	4.76	1	1.28	0	0	0	0	4	3.81	1	2.33	0	0	1	1.27	0	0	0	0	1	1.16	0	0	0	0	0	0	0	0	0	0
Dacarbazine	31	3.84	12	3.42	4	4.49	11	4.8	2	1.67	1	2.63	9	4.92	5	6.1	1	4.76	8	10.26	0	0	0	0	1	0.95	4	9.3	2	16.67	0	0	0	0	0	0	2	2.33	0	0	0	0	0	0	1	5.26	0	0
Dactinomycin	1	0.12	3	0.85	0	0	0	0	0	0	0	0	0	0	2	2.44	0	0	0	0	1	3.03	0	0	0	0	0	0	0	0	0	0	0	0	0	0	1	1.16	0	0	0	0	0	0	0	0	0	0
Docetaxel	83	10.29	75	21.37	5	5.62	49	21.4	34	28.33	3	7.89	11	6.01	12	14.63	0	0	2	2.56	15	45.45	0	0	7	6.67	4	9.3	2	16.67	7	8.86	2	9.09	0	0	4	4.65	7	21.88	0	0	3	6.38	1	5.26	0	0
Doxorubicin	517	64.06	35	9.97	1	1.12	129	56.33	15	12.5	0	0	141	77.05	5	6.1	1	4.76	50	64.1	2	6.06	0	0	82	78.1	1	2.33	0	0	27	34.18	7	31.82	0	0	57	66.28	3	9.38	0	0	31	65.96	2	10.53	0	0
Epirubicin	42	5.2	0	0	0	0	11	4.8	0	0	0	0	9	4.92	0	0	0	0	8	10.26	0	0	0	0	4	3.81	0	0	0	0	1	1.27	0	0	0	0	6	6.98	0	0	0	0	3	6.38	0	0	0	0
Etoposide	6	0.74	4	1.14	2	2.25	1	0.44	1	0.83	0	0	4	2.19	2	2.44	1	4.76	0	0	0	0	0	0	0	0	0	0	1	8.33	0	0	0	0	0	0	1	1.16	1	3.13	0	0	0	0	0	0	0	0
Everolimus	3	0.37	3	0.85	0	0	1	0.44	0	0	0	0	1	0.55	2	2.44	0	0	0	0	0	0	0	0	0	0	0	0	0	0	0	0	1	4.55	0	0	1	1.16	0	0	0	0	0	0	0	0	0	0
Gemcitabine	87	10.78	92	26.21	18	20.22	54	23.58	38	31.67	7	18.42	12	6.56	24	29.27	4	19.05	3	3.85	15	45.45	1	10	3	2.86	6	13.95	5	41.67	7	8.86	2	9.09	0	0	5	5.81	5	15.63	0	0	3	6.38	2	10.53	1	100
Ifosfamide	244	30.24	82	23.36	0	0	62	27.07	22	18.33	0	0	73	39.89	19	23.17	0	0	33	42.31	8	24.24	0	0	19	18.1	13	30.23	0	0	13	16.46	1	4.55	0	0	29	33.72	12	37.5	0	0	15	31.91	7	36.84	0	0
Imatinib	2	0.25	2	0.57	0	0	0	0	1	0.83	0	0	2	1.09	1	1.22	0	0	0	0	0	0	0	0	0	0	0	0	0	0	0	0	0	0	0	0	0	0	0	0	0	0	0	0	0	0	0	0
Interferon	0	0	0	0	0	0	0	0	0	0	0	0	0	0	0	0	0	0	0	0	0	0	0	0	0	0	0	0	0	0	0	0	0	0	0	0	0	0	0	0	0	0	0	0	0	0	0	0
Melphalan	0	0	0	0	0	0	0	0	0	0	0	0	0	0	0	0	0	0	0	0	0	0	0	0	0	0	0	0	0	0	0	0	0	0	0	0	0	0	0	0	0	0	0	0	0	0	0	0
Methotrexate	0	0	1	0.28	0	0	0	0	0	0	0	0	0	0	0	0	0	0	0	0	0	0	0	0	0	0	0	0	0	0	0	0	0	0	0	0	0	0	1	3.13	0	0	0	0	0	0	0	0
Paclitaxel	46	5.7	15	4.27	4	4.49	4	1.75	4	3.33	2	5.26	3	1.64	4	4.88	1	4.76	1	1.28	0	0	0	0	1	0.95	1	2.33	0	0	34	43.04	6	27.27	0	0	0	0	0	0	0	0	3	6.38	0	0	1	100
Pazopanib	15	1.86	55	15.67	19	21.35	5	2.18	24	20	6	15.79	2	1.09	14	17.07	4	19.05	1	1.28	3	9.09	5	50	1	0.95	2	4.65	1	8.33	0	0	1	4.55	1	25	5	5.81	4	12.5	2	66.67	1	2.13	7	36.84	0	0
Sirolimus	0	0	0	0	0	0	0	0	0	0	0	0	0	0	0	0	0	0	0	0	0	0	0	0	0	0	0	0	0	0	0	0	0	0	0	0	0	0	0	0	0	0	0	0	0	0	0	0
Sorafenib	0	0	0	0	0	0	0	0	0	0	0	0	0	0	0	0	0	0	0	0	0	0	0	0	0	0	0	0	0	0	0	0	0	0	0	0	0	0	0	0	0	0	0	0	0	0	0	0
Sulindac	0	0	0	0	0	0	0	0	0	0	0	0	0	0	0	0	0	0	0	0	0	0	0	0	0	0	0	0	0	0	0	0	0	0	0	0	0	0	0	0	0	0	0	0	0	0	0	0
Sunitinib	1	0.12	3	0.85	0	0	0	0	0	0	0	0	0	0	0	0	0	0	0	0	0	0	0	0	0	0	0	0	0	0	1	1.27	2	9.09	0	0	0	0	1	3.13	0	0	0	0	0	0	0	0
Tamoxifen	0	0	0	0	0	0	0	0	0	0	0	0	0	0	0	0	0	0	0	0	0	0	0	0	0	0	0	0	0	0	0	0	0	0	0	0	0	0	0	0	0	0	0	0	0	0	0	0
Temozolomide	1	0.12	0	0	0	0	0	0	0	0	0	0	0	0	0	0	0	0	1	1.28	0	0	0	0	0	0	0	0	0	0	0	0	0	0	0	0	0	0	0	0	0	0	0	0	0	0	0	0
TNF-alpha	0	0	0	0	0	0	0	0	0	0	0	0	0	0	0	0	0	0	0	0	0	0	0	0	0	0	0	0	0	0	0	0	0	0	0	0	0	0	0	0	0	0	0	0	0	0	0	0
Topotecan	0	0	2	0.57	1	1.12	0	0	0	0	0	0	0	0	1	1.22	0	0	0	0	0	0	1	10	0	0	1	2.33	0	0	0	0	0	0	0	0	0	0	0	0	0	0	0	0	0	0	0	0
Toremifene	0	0	0	0	0	0	0	0	0	0	0	0	0	0	0	0	0	0	0	0	0	0	0	0	0	0	0	0	0	0	0	0	0	0	0	0	0	0	0	0	0	0	0	0	0	0	0	0
Trabectedin	15	1.86	43	12.25	41	46.07	9	3.93	13	10.83	22	57.89	1	0.55	9	10.98	9	42.86	1	1.28	4	12.12	3	30	3	2.86	13	30.23	4	33.33	0	0	0	0	2	50	1	1.16	3	9.38	1	33.33	0	0	1	5.26	0	0
Vinblastine	2	0.25	0	0	0	0	0	0	0	0	0	0	1	0.55	0	0	0	0	0	0	0	0	0	0	0	0	0	0	0	0	1	1.27	0	0	0	0	0	0	0	0	0	0	0	0	0	0	0	0
Vincristine	2	0.25	2	0.57	0	0	0	0	0	0	0	0	2	1.09	1	1.22	0	0	0	0	0	0	0	0	0	0	0	0	0	0	0	0	0	0	0	0	0	0	1	3.13	0	0	0	0	0	0	0	0
Vinorelbine	1	0.12	2	0.57	1	1.12	0	0	0	0	1	2.63	1	0.55	1	1.22	0	0	0	0	0	0	0	0	0	0	1	2.33	0	0	0	0	0	0	0	0	0	0	0	0	0	0	0	0	0	0	0	0
Pegylated Liposomal Doxorubicin	4	0.5	1	0.28	0	0	0	0	1	0.83	0	0	1	0.55	0	0	0	0	0	0	0	0	0	0	0	0	0	0	0	0	2	2.53	0	0	0	0	1	1.16	0	0	0	0	0	0	0	0	0	0
Bleomycin	0	0	1	0.28	0	0	0	0	0	0	0	0	0	0	0	0	0	0	0	0	0	0	0	0	0	0	0	0	0	0	0	0	0	0	0	0	0	0	1	3.13	0	0	0	0	0	0	0	0
Following current ESMO treatment guidelines during first-line
Number of cycles during therapy lined (Known number of cycles)	761	100	337	100	84	100	214	100	115	100	36	100	175	100	76	100	19	100	72	100	31	100	10	100	100	100	43	100	12	100	74	100	21	100	3	100	81	100	32	100	3	100	45	100	19	100	1	100
Mean (SD)	5.68	2.64	5.87	3.3	5.63	3.72	5.68	2.42	6.05	3.37	5.78	4.09	5.31	2.22	5.64	2.46	5.37	3.4	6.21	2.7	6.06	2.85	5.1	3.03	5.4	2.08	6.07	3.81	6.33	4.54	5.92	4.44	6.1	5.34	4	3	5.99	2.46	5.31	2.48	6	1.73	5.96	2.4	5.58	3.92	6
Median	6		6		5		6		6		5.5		6		6		5		6		6		4		6		6		4		6		5		4		6		6		7		6		4		6
IQR (Q1, Q3)	5	6	4	6	3	7	5	6	4	7	2.5	8.5	4	6	4	6.5	3	6	6	6	5	6	3	7	4	6	3	7	3	8.5	4	6	4	8	1	7	5	6	3.5	6	4	7	6	6	3	6	6	6
(min, max)	1	39	1	26	1	19	1	28	1	24	1	19	1	21	1	13	1	14	2	24	1	14	1	11	1	15	1	21	3	15	1	39	1	26	1	7	1	18	1	13	4	7	1	15	2	20	6	6
Distribution
1	15	1.97	12	3.56	7	8.33	4	1.87	3	2.61	4	11.11	7	4	2	2.63	1	5.26	0	0	2	6.45	1	10	1	1	1	2.33	0	0	1	1.35	2	9.52	1	33.33	1	1.23	2	6.25	0	0	1	2.22	0	0	0	0
2	30	3.94	19	5.64	7	8.33	5	2.34	8	6.96	5	13.89	11	6.29	4	5.26	2	10.53	1	1.39	0	0	0	0	4	4	2	4.65	0	0	5	6.76	2	9.52	0	0	2	2.47	2	6.25	0	0	2	4.44	1	5.26	0	0
3	64	8.41	39	11.57	13	15.48	19	8.88	10	8.7	4	11.11	12	6.86	9	11.84	3	15.79	2	2.78	2	6.45	2	20	15	15	9	20.93	4	33.33	11	14.86	1	4.76	0	0	2	2.47	4	12.5	0	0	3	6.67	4	21.05	0	0
4	74	9.72	46	13.65	13	15.48	19	8.88	12	10.43	2	5.56	23	13.14	13	17.11	3	15.79	4	5.56	3	9.68	3	30	11	11	5	11.63	3	25	5	6.76	5	23.81	1	33.33	11	13.58	3	9.38	1	33.33	1	2.22	5	26.32	0	0
5	46	6.04	25	7.42	7	8.33	10	4.67	12	10.43	3	8.33	13	7.43	1	1.32	2	10.53	5	6.94	4	12.9	1	10	6	6	4	9.3	1	8.33	4	5.41	2	9.52	0	0	7	8.64	1	3.13	0	0	1	2.22	1	5.26	0	0
6	461	60.58	117	34.72	12	14.29	142	66.36	41	35.65	7	19.44	96	54.86	28	36.84	4	21.05	54	75	14	45.16	0	0	54	54	11	25.58	0	0	34	45.95	3	14.29	0	0	48	59.26	16	50	0	0	33	73.33	4	21.05	1	100
7+	71	9.33	79	23.44	25	29.76	15	7.01	29	25.22	11	30.56	13	7.43	19	25	4	21.05	6	8.33	6	19.35	3	30	9	9	11	25.58	4	33.33	14	18.92	6	28.57	1	33.33	10	12.35	4	12.5	2	66.67	4	8.89	4	21.05	0	0
Best response according to RECIST
Complete response	45	5.58	2	0.57	0	0	15	6.55	0	0	0	0	7	3.83	1	1.22	0	0	5	6.41	0	0	0	0	4	3.81	0	0	0	0	8	10.13	0	0	0	0	5	5.81	1	3.13	0	0	1	2.13	0	0	0	0
Partial response	313	38.79	129	36.75	14	15.73	104	45.41	48	40	8	21.05	70	38.25	27	32.93	1	4.76	24	30.77	17	51.52	2	20	34	32.38	14	32.56	2	16.67	25	31.65	6	27.27	0	0	41	47.67	12	37.5	1	33.33	15	31.91	5	26.32	0	0
Stable disesae (demonstrated by a scan at = 3 months)	247	30.61	107	30.48	39	43.82	66	28.82	36	30	16	42.11	52	28.42	22	26.83	10	47.62	34	43.59	11	33.33	6	60	32	30.48	9	20.93	3	25	22	27.85	8	36.36	3	75	22	25.58	10	31.25	1	33.33	19	40.43	11	57.89	0	0
No response/progression of disease	196	24.29	101	28.77	28	31.46	44	19.21	34	28.33	8	21.05	52	28.42	29	35.37	8	38.1	15	19.23	4	12.12	2	20	32	30.48	19	44.19	7	58.33	23	29.11	6	27.27	1	25	18	20.93	6	18.75	1	33.33	12	25.53	3	15.79	1	100
Don't know	6	0.74	12	3.42	8	8.99	0	0	2	1.67	6	15.79	2	1.09	3	3.66	2	9.52	0	0	1	3.03	0	0	3	2.86	1	2.33	0	0	1	1.27	2	9.09	0	0	0	0	3	9.38	0	0	0	0	0	0	0	0
Reason for discontinuation of treatment regimen
Adverse event	16	1.98	13	3.7	2	2.25	4	1.75	7	5.83	1	2.63	4	2.19	2	2.44	0	0	1	1.28	2	6.06	1	10	3	2.86	1	2.33	0	0	3	3.8	0	0	0	0	1	1.16	0	0	0	0	0	0	1	5.26	0	0
Patient decision	37	4.58	17	4.84	5	5.62	10	4.37	6	5	4	10.53	9	4.92	3	3.66	0	0	0	0	1	3.03	0	0	3	2.86	4	9.3	1	8.33	5	6.33	2	9.09	0	0	9	10.47	0	0	0	0	1	2.13	1	5.26	0	0
Progressive disease	274	33.95	153	43.59	47	52.81	68	29.69	52	43.33	17	44.74	55	30.05	36	43.9	13	61.9	26	33.33	13	39.39	4	40	47	44.76	24	55.81	8	66.67	35	44.3	10	45.45	2	50	27	31.4	9	28.13	2	66.67	16	34.04	9	47.37	1	100
Completion of planned course of treatment	450	55.76	110	31.34	6	6.74	136	59.39	36	30	3	7.89	110	60.11	26	31.71	1	4.76	44	56.41	14	42.42	0	0	50	47.62	8	18.6	1	8.33	34	43.04	3	13.64	0	0	50	58.14	17	53.13	0	0	26	55.32	6	31.58	1	100
Death	23	2.85	2	0.57	3	3.37	2	0.87	0	0	0	0	4	2.19	2	2.44	2	9.52	5	6.41	0	0	1	10	3	2.86	0	0	0	0	5	6.33	0	0	0	0	1	1.16	0	0	0	0	3	6.38	0	0	0	0
Loss to follow-up	14	1.73	60	17.09	28	31.46	7	3.06	24	20	14	36.84	1	0.55	10	12.2	5	23.81	3	3.85	3	9.09	4	40	0	0	6	13.95	2	16.67	0	0	7	31.82	2	50	2	2.33	6	18.75	1	33.33	1	2.13	4	21.05	0	0
Other	9	1.12	4	1.14	0	0	4	1.75	0	0	0	0	4	2.19	2	2.44	0	0	0	0	1	3.03	0	0	0	0	1	2.33	0	0	0	0	0	0	0	0	1	1.16	0	0	0	0	0	0	0	0	0	0
Don't know	6	0.74	2	0.57	0	0	2	0.87	0	0	0	0	2	1.09	2	2.44	0	0	0	0	0	0	0	0	0	0	0	0	0	0	1	1.27	0	0	0	0	0	0	0	0	0	0	1	2.13	0	0	0	0
Time from discontinuation of previous line to initiation of second- or subsequent line of therapy, months
Mean (SD)	---	---	6.54	6.14	3.14	4.09	---	---	6.85	6.2	3.43	4.59	---	---	6.16	5.42	2.58	3.23	---	---	7.24	8.5	4.26	6.42	---	---	5.94	6.2	2.54	2.28	---	---	7.37	7.13	2.02	1.66	---	---	6.65	4.95	2.96	2.47	---	---	5.24	4.67	5.03
Median	---	---	5.37		1.2		---	---	5.87		1.23		---	---	5.13		0.83		---	---	5.83		0.98		---	---	3.53		1.42		---	---	3.37		1.23		---	---	6.05		2.57		---	---	3.97		5.03
IQR (Q1, Q3)	---	---	1.63	8.87	0.7	4.2	---	---	1.57	9.07	0.7	4.67	---	---	1.63	8.37	0.53	3.37	---	---	1.4	8.2	0.7	3.6	---	---	0.9	7.83	0.93	3.73	---	---	2.17	11.67	1.15	2.88	---	---	2.77	9.3	0.7	5.6	---	---	1.13	7.6	5.03	5.03
Min, Max	---	---	0	45.2	0	22.17	---	---	0	30.8	0.23	22.17	---	---	0	20.53	0	13.3	---	---	0.47	45.2	0.57	20.17	---	---	0.4	28.43	0.7	7.13	---	---	0.43	23.03	1.1	4.5	---	---	0.47	20.17	0.7	5.6	---	---	0.47	15.87	5.03	5.03
Total duration of therapy line, months
Mean (SD)	5	3.1	4.91	3.22	4.77	3.57	4.86	2.75	4.91	2.82	4.77	3.67	4.62	2.57	4.46	2.44	5.27	3.82	5.2	2.47	4.72	2.81	3.62	2.02	4.6	2.51	5.4	3.64	4.83	4.19	5.52	5.02	5.47	6.55	1.55	2.19	5.68	3.76	4.96	2.69	6.2	3.11	5.68	2.93	5.66	4.69	6.87
Median	4.6		4.4		4		4.48		4.42		4.18		4.22		4.28		4.28		4.9		4.92		3.9		4.2		4.8		3.23		5.13		3.57		1.55		5.07		4.35		6.2		5.52		4.23		6.87
IQR (Q1, Q3)	3.53	5.9	3.2	5.83	2.37	6.07	3.6	5.63	3.22	5.83	2.18	6.18	3.23	5.9	3.02	5.68	3.38	6.87	3.67	5.93	3.3	5.43	2.27	5.57	3.03	5.67	2.93	6.5	2.37	4.33	3.27	6.77	2.13	6.13	0	3.1	3.93	6.17	3.3	5.67	4	8.4	3.73	6.57	3.27	6.77	6.87	6.87
Min, Max	0	41.33	0	26.83	0	15.37	0	20.7	0.47	18.6	0	15.37	0.03	15.4	0	12.17	0	13.37	1.4	16.7	0	14.5	0.47	5.6	0.2	14.73	0.23	18.2	2.1	14.93	0.07	41.33	0	26.83	0	3.1	0.23	27.43	0.53	12.4	4	8.4	0	14.7	0.7	20.43	6.87	6.87
Time from initiation of line of therapy to disease progression, months
Mean (SD)	8.54	6.85	6.01	4.63	5	3.78	8.96	6.07	6.41	4.86	5.46	4.29	7.81	5.74	5.14	3.39	5.06	3.8	8.82	6.77	6.48	5.89	3.68	2.02	7.95	6.75	5.58	4.14	4.77	4.31	9.73	11.91	6.64	7.18	3.89	3.52	8.44	5.63	6.38	4.03	6.45	3.46	8.61	5.86	6.73	5.1	5.33
Median	7.53		5.5		4.03		8.3		6.23		3.98		6.87		4.2		4.13		7.73		5.77		3.87		6.92		5.2		2.73		7		3.7		3.3		7.5		6.47		6.45		7.73		4.9		5.33
IQR (Q1, Q3)	4.1	11.03	2.47	8.37	2.57	6.47	4.9	11.47	2.63	8.77	2.65	7.73	3.97	11.07	2.1	7.83	2.87	6.87	5.23	10.6	2.3	8.83	2.2	5.7	2.9	10.33	2.57	8.03	2.57	4.97	2.9	10.47	2.8	10.1	0.7	7.67	4.43	12.1	2.5	9.1	4	8.9	5.13	10.97	3.7	8.23	5.33	5.33
Min, Max	0	70.33	0	28.67	0.27	15.6	0	39.13	0	28.67	0.33	15.37	0	41.07	0	12.63	0.27	13.37	1.03	51.07	0	22.83	0.67	5.77	0.2	37.1	0	18.73	1.83	15.6	0	70.33	0.87	27.1	0.7	7.67	0	27.53	0.47	14.47	4	8.9	0.9	31.97	1.87	20.43	5.33	5.33
Total follow-up time among patients who died during the follow-up period, months (n,%)
n (%)	545	67.53	172	49	38	42.7	132	57.64	51	42.5	13	34.21	134	73.22	47	57.32	9	42.86	55	70.51	17	51.52	4	40	78	74.29	25	58.14	8	66.67	54	68.35	9	40.91	2	50	57	66.28	12	37.5	1	33.33	35	74.47	11	57.89	1	100
Mean (SD)	19.75	19.1	26.82	18.77	31.85	20.1	19.72	15.78	24.95	15.9	30.12	17.16	19.81	19.88	28.3	22.73	39.81	30.51	18.34	12.73	26.59	14.25	29.18	17.81	23.97	27.7	32.03	21.95	32.81	15.56	17.65	17.32	25.4	19.62	17.4	9.81	15.79	13.84	22.15	10.1	20.07		22.05	21.63	23.91	18.68	26.3
Median	14.2		21.15		25.43		15.6		21.07		23.83		14.77		19.83		26.23		13.6		22.77		25.93		14.93		22.63		28.37		12.28		22.07		17.4		12.1		20.52		20.07		13.7		16.47		26.3
IQR (Q1, Q3)	8.7	23.03	15.73	29.8	20.07	42	9.27	24.83	15.67	28.23	18.67	42	7.7	23.43	16.9	32.03	24.6	45.17	9.6	23.93	19.57	28.77	18.07	40.3	8.8	27.33	15.53	49.13	22.53	44.25	5.6	20.07	10.47	32.73	10.47	24.33	8.43	20.27	15.4	22.23	20.07	20.07	10.17	26.3	11.73	26.3	26.3	26.3
Min, Max	0	130.67	2.1	109.6	8.63	109.6	1.67	86.23	6.17	86.23	8.63	62.53	0	109.6	2.1	109.6	11.07	109.6	2.2	66.9	10.37	66.9	11.13	53.73	1.5	130.67	9.8	83.7	15.47	56.7	1.5	76.53	4.3	60.3	10.47	24.33	1.37	95.3	11	44.27	20.07	20.07	1.87	97	7.8	61.8	26.3	26.3
Total follow-up time among patients alive at the end of the follow-up period, months (n,%)
n (%)	233	28.87	169	48.15	51	57.3	88	38.43	67	55.83	25	65.79	45	24.59	34	41.46	12	57.14	21	26.92	14	42.42	6	60	20	19.05	16	37.21	4	33.33	22	27.85	12	54.55	2	50	26	30.23	19	59.38	2	66.67	11	23.4	7	36.84	0	0
Mean (SD)	34.87	20.69	34.56	18.81	38.46	22.22	33.47	17.96	33.78	18.38	34.87	20.54	36.42	22.34	39.1	24.7	50.48	30.36	34.72	14.13	34.08	16.28	38.61	16.99	44.03	37.26	37.74	22.87	37.25	7.96	32.81	17.29	31.59	11.63	24.08	2.57	33.74	13.82	32.57	12.23	27.68	8.08	26.68	5.17	25.08	3.5
Median	28.57		27.03		28.6		26.47		26.47		25.43		27.73		28.6		34.12		29.23		26.38		32.57		29		28.98		39.77		29.27		31.17		24.08		31.67		31.48		27.68		25.65		25.05
IQR (Q1, Q3)	22.63	39.8	23.8	35.83	24.73	42.3	22.3	39.8	23.77	38.53	23.8	38.97	23.3	36.17	24.73	36.17	27.2	82.93	25.2	44.6	24.12	40.33	26.93	46.7	21	55.07	24.17	43.67	32	42.5	22.27	33.63	25.9	32.9	22.27	25.9	22.1	40.87	23.6	33.85	21.97	33.4	22.43	30.8	22.43	27.32
Min, Max	2.8	132.53	15.83	116.83	19.93	108.83	9.13	116.83	19.87	116.83	19.93	108.83	9.33	107.03	19.13	107.03	25.47	107.03	15.83	69.27	15.83	69.27	23.6	69.27	2.8	132.53	16.33	111.5	25.8	43.67	4.67	82.43	21.27	67.57	22.27	25.9	17.97	66.77	19.43	66.77	21.97	33.4	19.67	34.73	20.43	30.57
Total follow-up time among ALL patients, months
Mean (SD)	24.66	20.86	30.77	19.16	35.64	21.48	25.55	18.04	30.03	17.85	33.24	19.35	24.26	21.79	32.91	24.05	45.9	30.14	23.17	15.07	30.22	15.5	34.84	17.02	29.13	31.51	34.42	22.25	34.29	13.27	22.45	18.61	29.06	15.29	20.74	7.01	21.84	16.18	28.66	12.42	25.14	7.21	23.23	18.88	24.4	14.1	26.3
Median	20.27		25.03		26.67		21.9		24.75		25.32		19.17		25.18		28.6		21.57		25.2		29.05		18.07		25.8		32.1		19.27		26.6		23.3		19.75		25.12		21.97		16.73		21.53		26.3
IQR (Q1, Q3)	10.7	30.57	20.03	33.4	23.8	42	13.37	30.7	20.7	33.65	21.57	41.3	9.87	28.6	18.93	34.57	25.87	65.67	10.83	29.23	22.07	31.17	25	46.7	9.8	33.97	18.8	49.13	24.35	42.5	9.5	30.9	22.07	32.9	16.37	25.12	9.43	30.8	21.08	33.23	20.07	33.4	11.67	28.53	15.13	26.3	26.3	26.3
Min, Max	0	132.53	2.1	116.83	8.63	109.6	1.67	116.83	6.17	116.83	8.63	108.83	0	109.6	2.1	109.6	11.07	109.6	2.2	69.27	10.37	69.27	11.13	69.27	1.5	132.53	9.8	111.5	15.47	56.7	1.5	82.43	4.3	67.57	10.47	25.9	1.37	95.3	11	66.77	20.07	33.4	1.87	97	7.8	61.8	26.3	26.3
Use of supportive/palliative medications during line of treatment
Pain control	376	46.59	185	52.71	50	56.18	90	39.3	54	45	21	55.26	86	46.99	45	54.88	10	47.62	41	52.56	19	57.58	5	50	43	40.95	20	46.51	9	75	36	45.57	8	36.36	2	50	48	55.81	25	78.13	2	66.67	32	68.09	14	73.68	1	100
Antiemetics	420	52.04	199	56.7	45	50.56	125	54.59	63	52.5	17	44.74	98	53.55	46	56.1	12	57.14	39	50	22	66.67	3	30	57	54.29	30	69.77	9	75	39	49.37	9	40.91	2	50	44	51.16	21	65.63	1	33.33	18	38.3	8	42.11	1	100
Antibiotics	106	13.14	46	13.11	11	12.36	22	9.61	16	13.33	2	5.26	29	15.85	11	13.41	3	14.29	11	14.1	4	12.12	2	20	14	13.33	7	16.28	3	25	11	13.92	2	9.09	0	0	10	11.63	3	9.38	1	33.33	9	19.15	3	15.79	0	0
Antifungals	28	3.47	11	3.13	5	5.62	6	2.62	4	3.33	2	5.26	8	4.37	1	1.22	1	4.76	2	2.56	2	6.06	0	0	3	2.86	2	4.65	1	8.33	4	5.06	1	4.55	0	0	2	2.33	0	0	1	33.33	3	6.38	1	5.26	0	0
Antivirals	3	0.37	3	0.85	0	0	0	0	2	1.67	0	0	1	0.55	1	1.22	0	0	1	1.28	0	0	0	0	0	0	0	0	0	0	0	0	0	0	0	0	0	0	0	0	0	0	1	2.13	0	0	0	0
Dexrazoxane	3	0.37	0	0	0	0	0	0	0	0	0	0	1	0.55	0	0	0	0	1	1.28	0	0	0	0	0	0	0	0	0	0	0	0	0	0	0	0	0	0	0	0	0	0	1	2.13	0	0	0	0
Transfusions	72	8.92	37	10.54	11	12.36	27	11.79	10	8.33	5	13.16	12	6.56	8	9.76	2	9.52	8	10.26	6	18.18	1	10	4	3.81	5	11.63	3	25	7	8.86	2	9.09	0	0	10	11.63	3	9.38	0	0	4	8.51	3	15.79	0	0
Antianxiety, antidepressant drugs	81	10.04	35	9.97	12	13.48	23	10.04	13	10.83	5	13.16	18	9.84	9	10.98	3	14.29	7	8.97	2	6.06	0	0	9	8.57	5	11.63	3	25	6	7.59	1	4.55	1	25	11	12.79	3	9.38	0	0	7	14.89	2	10.53	0	0
Growth factors	145	17.97	63	17.95	19	21.35	43	18.78	17	14.17	10	26.32	45	24.59	18	21.95	3	14.29	13	16.67	7	21.21	1	10	16	15.24	10	23.26	3	25	9	11.39	3	13.64	2	50	13	15.12	4	12.5	0	0	6	12.77	4	21.05	0	0
Bisphosphonates	18	2.23	6	1.71	2	2.25	3	1.31	2	1.67	1	2.63	4	2.19	0	0	0	0	2	2.56	1	3.03	0	0	2	1.9	1	2.33	1	8.33	3	3.8	0	0	0	0	2	2.33	0	0	0	0	2	4.26	2	10.53	0	0
Referral to psychiatrist, psychologist, or other professional for distress management	45	5.58	26	7.41	8	8.99	13	5.68	8	6.67	5	13.16	8	4.37	5	6.1	1	4.76	4	5.13	3	9.09	1	10	11	10.48	6	13.95	1	8.33	6	7.59	1	4.55	0	0	3	3.49	1	3.13	0	0	0	0	2	10.53	0	0
Oxygen	51	6.32	20	5.7	7	7.87	13	5.68	6	5	1	2.63	14	7.65	6	7.32	2	9.52	3	3.85	2	6.06	2	20	2	1.9	2	4.65	2	16.67	10	12.66	1	4.55	0	0	8	9.3	3	9.38	0	0	1	2.13	0	0	0	0
Radiation therapy, excluding utilization for pain control	21	2.6	9	2.56	1	1.12	4	1.75	2	1.67	1	2.63	4	2.19	3	3.66	0	0	6	7.69	0	0	0	0	2	1.9	2	4.65	0	0	2	2.53	1	4.55	0	0	2	2.33	1	3.13	0	0	1	2.13	0	0	0	0
Nutritional support	131	16.23	48	13.68	9	10.11	43	18.78	15	12.5	6	15.79	21	11.48	13	15.85	0	0	9	11.54	3	9.09	1	10	17	16.19	9	20.93	2	16.67	17	21.52	2	9.09	0	0	16	18.6	4	12.5	0	0	8	17.02	2	10.53	0	0
Corticosteroids, except for utilization for pain control	168	20.82	93	26.5	21	23.6	56	24.45	29	24.17	10	26.32	40	21.86	23	28.05	4	19.05	13	16.67	9	27.27	4	40	20	19.05	14	32.56	1	8.33	18	22.78	8	36.36	1	25	15	17.44	5	15.63	1	33.33	6	12.77	5	26.32	0	0
Patient did not receive any supportive care	106	13.14	42	11.97	13	14.61	31	13.54	15	12.5	3	7.89	26	14.21	11	13.41	4	19.05	13	16.67	6	18.18	4	40	12	11.43	4	9.3	0	0	13	16.46	3	13.64	2	50	5	5.81	1	3.13	0	0	6	12.77	2	10.53	0	0
Others	1	0.12	1	0.28	1	1.12	0	0	0	0	0	0	1	0.55	0	0	1	4.76	0	0	0	0	0	0	0	0	0	0	0	0	0	0	0	0	0	0	0	0	0	0	0	0	0	0	1	5.26	0	0
Don’t know	81	10.04	11	3.13	1	1.12	22	9.61	6	5	0	0	19	10.38	2	2.44	0	0	3	3.85	0	0	0	0	14	13.33	0	0	0	0	8	10.13	1	4.55	0	0	13	15.12	2	6.25	1	33.33	2	4.26	0	0	0	0
Treatment for pain control among those who received supportive/palliative care during line of treatment
Opiate analgesics	299	79.52	149	80.54	42	84	70	77.78	43	79.63	18	85.71	72	83.72	35	77.78	8	80	34	82.93	17	89.47	5	100	36	83.72	15	75	8	88.89	27	75	5	62.5	1	50	36	75	20	80	1	50	24	75	14	100	1	100
Other analgesics	199	52.93	100	54.05	27	54	50	55.56	30	55.56	12	57.14	45	52.33	23	51.11	3	30	20	48.78	13	68.42	4	80	23	53.49	11	55	4	44.44	22	61.11	3	37.5	2	100	28	58.33	16	64	2	100	11	34.38	4	28.57	0	0
Radiotherapy	36	9.57	24	12.97	6	12	7	7.78	11	20.37	3	14.29	7	8.14	5	11.11	0	0	6	14.63	2	10.53	2	40	2	4.65	0	0	0	0	2	5.56	2	25	1	50	6	12.5	3	12	0	0	6	18.75	1	7.14	0	0
Psychological intervention	23	6.12	8	4.32	1	2	5	5.56	4	7.41	1	4.76	6	6.98	2	4.44	0	0	3	7.32	0	0	0	0	2	4.65	0	0	0	0	2	5.56	1	12.5	0	0	3	6.25	0	0	0	0	2	6.25	1	7.14	0	0
Sedation for refractory pain	17	4.52	6	3.24	2	4	5	5.56	0	0	0	0	3	3.49	4	8.89	0	0	2	4.88	1	5.26	1	20	0	0	0	0	1	11.11	1	2.78	0	0	0	0	5	10.42	0	0	0	0	1	3.13	1	7.14	0	0
Epidural infusions	1	0.27	3	1.62	0	0	0	0	1	1.85	0	0	1	1.16	2	4.44	0	0	0	0	0	0	0	0	0	0	0	0	0	0	0	0	0	0	0	0	0	0	0	0	0	0	0	0	0	0	0	0
Splanchnic nerve block	0	0	1	0.54	0	0	0	0	0	0	0	0	0	0	1	2.22	0	0	0	0	0	0	0	0	0	0	0	0	0	0	0	0	0	0	0	0	0	0	0	0	0	0	0	0	0	0	0	0
Other treatment	0	0	1	0.54	0	0	0	0	1	1.85	0	0	0	0	0	0	0	0	0	0	0	0	0	0	0	0	0	0	0	0	0	0	0	0	0	0	0	0	0	0	0	0	0	0	0	0	0	0
Don’t know	1	0.27	1	0.54	0	0	0	0	1	1.85	0	0	0	0	0	0	0	0	1	2.44	0	0	0	0	0	0	0	0	0	0	0	0	0	0	0	0	0	0	0	0	0	0	0	0	0	0	0	0
Type of transfusions among those who received supportive/palliative care during line of treatment
Red blood cell transfusion	67	93.06	36	97.3	11	100	26	96.3	10	100	5	100	11	91.67	8	100	2	100	8	100	6	100	1	100	4	100	5	100	3	100	7	100	2	100	0		8	80	2	66.67	0		3	75	3	100	0
Platelet transfusion	11	15.28	5	13.51	0	0	5	18.52	2	20	0	0	2	16.67	1	12.5	0	0	0	0	0	0	0	0	0	0	0	0	0	0	1	14.29	0	0	0		3	30	1	33.33	0		0	0	1	33.33	0
Other transfusion typesl to be added based upon actual data	0	0	0	0	0	0	0	0	0	0	0	0	0	0	0	0	0	0	0	0	0	0	0	0	0	0	0	0	0	0	0	0	0	0	0		0	0	0	0	0		0	0	0	0	0
Don’t know	2	2.78	0	0	0	0	1	3.7	0	0	0	0	0	0	0	0	0	0	0	0	0	0	0	0	0	0	0	0	0	0	0	0	0	0	0		0	0	0	0	0		1	25	0	0	0
Diagnostic tests as part of supportive care during line of treatment
Computed tomography (CT) scan	688	85.25	294	83.76	79	88.76	203	88.65	102	85	32	84.21	151	82.51	68	82.93	20	95.24	64	82.05	30	90.91	9	90	93	88.57	37	86.05	12	100	59	74.68	11	50	3	75	80	93.02	31	96.88	3	100	38	80.85	15	78.95	0	0
Positron emission tomography (PET) scan (whole body)	96	11.9	28	7.98	11	12.36	27	11.79	8	6.67	6	15.79	17	9.29	5	6.1	1	4.76	19	24.36	3	9.09	3	30	7	6.67	3	6.98	0	0	9	11.39	5	22.73	1	25	9	10.47	2	6.25	0	0	8	17.02	2	10.53	0	0
GI endoscope	15	1.86	1	0.28	0	0	4	1.75	1	0.83	0	0	6	3.28	0	0	0	0	1	1.28	0	0	0	0	2	1.9	0	0	0	0	0	0	0	0	0	0	2	2.33	0	0	0	0	0	0	0	0	0	0
Magnetic Resonance Imaging (MRI)	120	14.87	31	8.83	5	5.62	33	14.41	8	6.67	2	5.26	26	14.21	11	13.41	1	4.76	10	12.82	3	9.09	1	10	16	15.24	3	6.98	1	8.33	9	11.39	3	13.64	0	0	17	19.77	2	6.25	0	0	9	19.15	1	5.26	0	0
Multi Gated Acquisition Scan (MUGA)	44	5.45	12	3.42	2	2.25	15	6.55	7	5.83	1	2.63	6	3.28	2	2.44	1	4.76	4	5.13	2	6.06	0	0	5	4.76	0	0	0	0	6	7.59	0	0	0	0	6	6.98	0	0	0	0	2	4.26	1	5.26	0	0
No diagnostic tests performed as part of their supportive care during this period	52	6.44	32	9.12	7	7.87	12	5.24	11	9.17	5	13.16	18	9.84	9	10.98	1	4.76	3	3.85	2	6.06	0	0	6	5.71	2	4.65	0	0	10	12.66	6	27.27	1	25	1	1.16	1	3.13	0	0	2	4.26	1	5.26	0	0
Don’t know	14	1.73	6	1.71	1	1.12	1	0.44	1	0.83	0	0	8	4.37	3	3.66	0	0	0	0	0	0	0	0	0	0	0	0	0	0	4	5.06	1	4.55	0	0	0	0	0	0	0	0	1	2.13	1	5.26	1	100

## Sheet: Tx (UK)
Table B-7. Treatment Characteristics of Advanced Soft Tissue Sarcoma by Line of Therapy: United Kingdom
	Total						Leiomyosarcomas						Others / NOS						Fibroblastic/Myofibroblastic						Liposarcomas						Vascular sarcomas						Rhabdomyosarcomas						Synovial sarcoma
Characteristic	First line		Second line		Third line		First line		Second line		Third line		First line		Second line		Third line		First line		Second line		Third line		First line		Second line		Third line		First line		Second line		Third line		First line		Second line		Third line		First line		Second line		Third line
	N	%	N	%	N	%	N	%	N	%	N	%	N	%	N	%	N	%	N	%	N	%	N	%	N	%	N	%	N	%	N	%	N	%	N	%	N	%	N	%	N	%	N	%	N	%	N	%
Patients receiving nth-line therapy	199	100	75	100	11	100	61	100	27	100	7	100	40	100	13	100	1	100	24	100	10	100	0		14	100	4	100	1	100	16	100	4	100	0		33	100	13	100	2	100	11	100	4	100	0
Weight in Kg at start of therapy line (Known weight)	136	100	64	100	9	100	42	100	25	100	7	100	22	100	6	100	0		20	100	9	100	0		10	100	3	100	0		10	100	4	100	0		22	100	13	100	2	100	10	100	4	100	0
Mean (SD)	71.82	9.68	70.85	10.33	66.44	11.86	71.4	8.03	70.5	8.8	66.71	13.61	71.89	8.71	75.67	12.03			71	9.43	69	9.26			82.38	12.36	80.67	9.02			76.12	13.2	84	21.1			66.59	7.69	65.08	4.84	65.5	3.54	71.8	8.22	68.25	4.65
Median	70		69		65		70.15		69		65		73.5		72.5				69.5		66				77		80				72		81				68		65		65.5		69.5		69
IQR (Q1, Q3)	65	77.5	64	74.5	62	75	65	76	65	75	60	80	67	78	67	83			67	76.5	62	77			76	85	72	90			67	78	67	101			63	70	61	70	63	68	65	80	65	71.5
(min, max)	46	113.8	50	110	43	82	55	90	50	86.5	43	82	47.5	87	63	96			46	90	60	86			70	113.8	72	90			65	107.2	64	110			50	84	56	72	63	68	62	84	62	73
Body surface area at start of therapy line (Known BSA)	116	100	58	100	9	100	37	100	24	100	7	100	17	100	6	100	0		15	100	6	100	0		9	100	3	100	0		9	100	3	100	0		19	100	12	100	2	100	10	100	4	100	0
Mean (SD)	1.85	0.14	1.83	0.16	1.78	0.21	1.85	0.13	1.84	0.13	1.77	0.24	1.84	0.15	1.93	0.19			1.82	0.07	1.73	0.06			2	0.17	1.95	0.09			1.92	0.19	2.1	0.29			1.77	0.14	1.74	0.11	1.79	0.11	1.85	0.1	1.8	0.06
Median	1.84		1.82		1.72		1.85		1.84		1.72		1.87		1.86				1.81		1.72				1.95		1.96				1.84		2.15				1.79		1.73		1.79		1.82		1.82
IQR (Q1, Q3)	1.76	1.93	1.74	1.9	1.69	1.91	1.75	1.93	1.76	1.94	1.65	2.01	1.76	1.92	1.82	2.01			1.78	1.88	1.68	1.79			1.93	1.99	1.84	2.03			1.82	1.9	1.79	2.36			1.69	1.87	1.68	1.83	1.71	1.87	1.76	1.93	1.76	1.84
(min, max)	1.48	2.42	1.48	2.36	1.37	2.06	1.55	2.13	1.48	2.06	1.37	2.06	1.48	2.07	1.75	2.29			1.68	1.93	1.66	1.82			1.82	2.42	1.84	2.03			1.75	2.33	1.79	2.36			1.48	2.06	1.53	1.9	1.71	1.87	1.71	2.01	1.72	1.84
Performance Status at start of therapy line
Performance Status measured on the ECOG scale
Mean (SD)	1.04	0.44	1.17	0.45	1.64	0.5	1.03	0.45	1.22	0.42	1.57	0.53	1.08	0.42	1.31	0.63	2		0.92	0.28	1	0			1	0.55	1	0	2		1.06	0.57	1.5	0.58			1.15	0.44	1.15	0.38	1.5	0.71	0.82	0.4	0.75	0.5
Median	1		1		2		1		1		2		1		1		2		1		1				1		1		2		1		1.5				1		1		1.5		1		1
IQR (Q1, Q3)	1	1	1	1	1	2	1	1	1	1	1	2	1	1	1	2	2	2	1	1	1	1			1	1	1	1	2	2	1	1	1	2			1	1	1	1	1	2	1	1	0.5	1
(min, max)	0	2	0	2	1	2	0	2	1	2	1	2	0	2	0	2	2	2	0	1	1	1			0	2	1	1	2	2	0	2	1	2			0	2	1	2	1	2	0	1	0	1
Distribution
0=Fully active, able to carry on all pre-disease performance without restriction	16	8.04	2	2.67	0	0	5	8.2	0	0	0	0	2	5	1	7.69	0	0	2	8.33	0	0	0		2	14.29	0	0	0	0	2	12.5	0	0	0		1	3.03	0	0	0	0	2	18.18	1	25	0
1=Restricted in physically strenuous activity but ambulatory	160	80.4	58	77.33	4	36.36	49	80.33	21	77.78	3	42.86	33	82.5	7	53.85	0	0	22	91.67	10	100	0		10	71.43	4	100	0	0	11	68.75	2	50	0		26	78.79	11	84.62	1	50	9	81.82	3	75	0
2=Ambulatory and capable of all self-care but unable to carry out any work	23	11.56	15	20	7	63.64	7	11.48	6	22.22	4	57.14	5	12.5	5	38.46	1	100	0	0	0	0	0		2	14.29	0	0	1	100	3	18.75	2	50	0		6	18.18	2	15.38	1	50	0	0	0	0	0
3=Capable of only limited self-care, confined to bed or chair more than 50% of waking hours	0	0	0	0	0	0	0	0	0	0	0	0	0	0	0	0	0	0	0	0	0	0	0		0	0	0	0	0	0	0	0	0	0	0		0	0	0	0	0	0	0	0	0	0	0
4=Completely disabled. Cannot carry on any self-care. Totally confined to bed or chair	0	0	0	0	0	0	0	0	0	0	0	0	0	0	0	0	0	0	0	0	0	0	0		0	0	0	0	0	0	0	0	0	0	0		0	0	0	0	0	0	0	0	0	0	0
Dont know	0	0	0	0	0	0	0	0	0	0	0	0	0	0	0	0	0	0	0	0	0	0	0		0	0	0	0	0	0	0	0	0	0	0		0	0	0	0	0	0	0	0	0	0	0
Use of cancer-directed treatments during therapy line
Overall
Chemotherapy	187	93.9698	55	73.3333	9	81.8182	58	95.082	21	77.7778	6	85.7143	39	97.5	7	53.8462	1	100	23	95.8333	10	100			14	100	4	100	1	100	16	100	2	50			27	81.8182	10	76.9231	1	50	10	90.9091	1	25
Biologic therapy	0	0	0	0	0	0	0	0	0	0	0	0	0	0	0	0	0	0	0	0	0	0			0	0	0	0	0	0	0	0	0	0			0	0	0	0	0	0	0	0	0	0
Targeted therapy	12	6.03015	20	26.6667	2	18.1818	3	4.91803	6	22.2222	1	14.2857	1	2.5	6	46.1538	0	0	1	4.16667	0	0			0	0	0	0	0	0	0	0	2	50			6	18.1818	3	23.0769	1	50	1	9.09091	3	75
Single class of agents																												0		0
Chemotherapy only	187	93.9698	55	73.3333	9	81.8182	58	95.082	21	77.7778	6	85.7143	39	97.5	7	53.8462	1	100	23	95.8333	10	100			14	100	4	100	1	100	16	100	2	50			27	81.8182	10	76.9231	1	50	10	90.9091	1	25
Biologic therapy only	0	0	0	0	0	0	0	0	0	0	0	0	0	0	0	0	0	0	0	0	0	0			0	0	0	0	0	0	0	0	0	0			0	0	0	0	0	0	0	0	0	0
Targeted therapy only	12	6.03015	20	26.6667	2	18.1818	3	4.91803	6	22.2222	1	14.2857	1	2.5	6	46.1538	0	0	1	4.16667	0	0			0	0	0	0	0	0	0	0	2	50			6	18.1818	3	23.0769	1	50	1	9.09091	3	75
Combination of classes of agents																												0		0
Chemotherapy + biologic therapyb	0	0	0	0	0	0	0	0	0	0	0	0	0	0	0	0	0	0	0	0	0	0			0	0	0	0	0	0	0	0	0	0			0	0	0	0	0	0	0	0	0	0
Chemotherapy + targeted therapyc	0	0	0	0	0	0	0	0	0	0	0	0	0	0	0	0	0	0	0	0	0	0			0	0	0	0	0	0	0	0	0	0			0	0	0	0	0	0	0	0	0	0
Biologic therapyb + targeted therapyc	0	0	0	0	0	0	0	0	0	0	0	0	0	0	0	0	0	0	0	0	0	0			0	0	0	0	0	0	0	0	0	0			0	0	0	0	0	0	0	0	0	0
Chemotherapy + biologic therapyb + targeted therapyc	0	0	0	0	0	0	0	0	0	0	0	0	0	0	0	0	0	0	0	0	0	0			0	0	0	0	0	0	0	0	0	0			0	0	0	0	0	0	0	0	0	0
Use of selected chemotherapies during therapy line
Bevacizumab	0	0	0	0	0	0	0	0	0	0	0	0	0	0	0	0	0	0	0	0	0	0			0	0	0	0	0	0	0	0	0	0			0	0	0	0	0	0	0	0	0	0
Carboplatin	2	1.01	0	0	0	0	2	3.28	0	0	0	0	0	0	0	0	0	0	0	0	0	0			0	0	0	0	0	0	0	0	0	0			0	0	0	0	0	0	0	0	0	0
Cisplatin	3	1.51	1	1.33	0	0	1	1.64	0	0	0	0	0	0	1	7.69	0	0	0	0	0	0			0	0	0	0	0	0	0	0	0	0			1	3.03	0	0	0	0	1	9.09	0	0
Crizotinib	5	2.51	1	1.33	0	0	1	1.64	0	0	0	0	1	2.5	0	0	0	0	1	4.17	0	0			0	0	0	0	0	0	0	0	1	25			1	3.03	0	0	0	0	1	9.09	0	0
Cyclophosphamide	0	0	0	0	0	0	0	0	0	0	0	0	0	0	0	0	0	0	0	0	0	0			0	0	0	0	0	0	0	0	0	0			0	0	0	0	0	0	0	0	0	0
Dacarbazine	13	6.53	0	0	0	0	5	8.2	0	0	0	0	5	12.5	0	0	0	0	2	8.33	0	0			0	0	0	0	0	0	0	0	0	0			1	3.03	0	0	0	0	0	0	0	0
Dactinomycin	0	0	1	1.33	0	0	0	0	0	0	0	0	0	0	1	7.69	0	0	0	0	0	0			0	0	0	0	0	0	0	0	0	0			0	0	0	0	0	0	0	0	0	0
Docetaxel	19	9.55	27	36	1	9.09	13	21.31	15	55.56	0	0	1	2.5	0	0	0	0	1	4.17	7	70			1	7.14	0	0	1	100	1	6.25	0	0			1	3.03	5	38.46	0	0	1	9.09	0	0
Doxorubicin	141	70.85	8	10.67	0	0	35	57.38	3	11.11	0	0	37	92.5	1	7.69	0	0	19	79.17	1	10			12	85.71	0	0	0	0	6	37.5	0	0			23	69.7	3	23.08	0	0	9	81.82	0	0
Epirubicin	0	0	0	0	0	0	0	0	0	0	0	0	0	0	0	0	0	0	0	0	0	0			0	0	0	0	0	0	0	0	0	0			0	0	0	0	0	0	0	0	0	0
Etoposide	1	0.5	0	0	0	0	0	0	0	0	0	0	1	2.5	0	0	0	0	0	0	0	0			0	0	0	0	0	0	0	0	0	0			0	0	0	0	0	0	0	0	0	0
Everolimus	0	0	0	0	0	0	0	0	0	0	0	0	0	0	0	0	0	0	0	0	0	0			0	0	0	0	0	0	0	0	0	0			0	0	0	0	0	0	0	0	0	0
Gemcitabine	18	9.05	30	40	2	18.18	14	22.95	17	62.96	0	0	1	2.5	2	15.38	1	100	0	0	7	70			0	0	0	0	1	100	0	0	0	0			2	6.06	4	30.77	0	0	1	9.09	0	0
Ifosfamide	62	31.16	8	10.67	0	0	21	34.43	0	0	0	0	10	25	2	15.38	0	0	12	50	1	10			0	0	1	25	0	0	6	37.5	0	0			13	39.39	3	23.08	0	0	0	0	1	25
Imatinib	0	0	0	0	0	0	0	0	0	0	0	0	0	0	0	0	0	0	0	0	0	0			0	0	0	0	0	0	0	0	0	0			0	0	0	0	0	0	0	0	0	0
Interferon	0	0	0	0	0	0	0	0	0	0	0	0	0	0	0	0	0	0	0	0	0	0			0	0	0	0	0	0	0	0	0	0			0	0	0	0	0	0	0	0	0	0
Melphalan	0	0	0	0	0	0	0	0	0	0	0	0	0	0	0	0	0	0	0	0	0	0			0	0	0	0	0	0	0	0	0	0			0	0	0	0	0	0	0	0	0	0
Methotrexate	0	0	0	0	0	0	0	0	0	0	0	0	0	0	0	0	0	0	0	0	0	0			0	0	0	0	0	0	0	0	0	0			0	0	0	0	0	0	0	0	0	0
Paclitaxel	5	2.51	4	5.33	1	9.09	2	3.28	1	3.7	1	14.29	0	0	2	15.38	0	0	0	0	0	0			0	0	0	0	0	0	3	18.75	1	25			0	0	0	0	0	0	0	0	0	0
Pazopanib	7	3.52	18	24	2	18.18	2	3.28	6	22.22	1	14.29	0	0	6	46.15	0	0	0	0	0	0			0	0	0	0	0	0	0	0	1	25			5	15.15	2	15.38	1	50	0	0	3	75
Sirolimus	0	0	0	0	0	0	0	0	0	0	0	0	0	0	0	0	0	0	0	0	0	0			0	0	0	0	0	0	0	0	0	0			0	0	0	0	0	0	0	0	0	0
Sorafenib	0	0	0	0	0	0	0	0	0	0	0	0	0	0	0	0	0	0	0	0	0	0			0	0	0	0	0	0	0	0	0	0			0	0	0	0	0	0	0	0	0	0
Sulindac	0	0	0	0	0	0	0	0	0	0	0	0	0	0	0	0	0	0	0	0	0	0			0	0	0	0	0	0	0	0	0	0			0	0	0	0	0	0	0	0	0	0
Sunitinib	0	0	1	1.33	0	0	0	0	0	0	0	0	0	0	0	0	0	0	0	0	0	0			0	0	0	0	0	0	0	0	0	0			0	0	1	7.69	0	0	0	0	0	0
Tamoxifen	0	0	0	0	0	0	0	0	0	0	0	0	0	0	0	0	0	0	0	0	0	0			0	0	0	0	0	0	0	0	0	0			0	0	0	0	0	0	0	0	0	0
Temozolomide	0	0	0	0	0	0	0	0	0	0	0	0	0	0	0	0	0	0	0	0	0	0			0	0	0	0	0	0	0	0	0	0			0	0	0	0	0	0	0	0	0	0
TNF-alpha	0	0	0	0	0	0	0	0	0	0	0	0	0	0	0	0	0	0	0	0	0	0			0	0	0	0	0	0	0	0	0	0			0	0	0	0	0	0	0	0	0	0
Topotecan	0	0	0	0	0	0	0	0	0	0	0	0	0	0	0	0	0	0	0	0	0	0			0	0	0	0	0	0	0	0	0	0			0	0	0	0	0	0	0	0	0	0
Toremifene	0	0	0	0	0	0	0	0	0	0	0	0	0	0	0	0	0	0	0	0	0	0			0	0	0	0	0	0	0	0	0	0			0	0	0	0	0	0	0	0	0	0
Trabectedin	1	0.5	4	5.33	6	54.55	0	0	0	0	5	71.43	0	0	0	0	0	0	0	0	1	10			1	7.14	3	75	0	0	0	0	0	0			0	0	0	0	1	50	0	0	0	0
Vinblastine	1	0.5	0	0	0	0	0	0	0	0	0	0	0	0	0	0	0	0	0	0	0	0			0	0	0	0	0	0	1	6.25	0	0			0	0	0	0	0	0	0	0	0	0
Vincristine	1	0.5	1	1.33	0	0	0	0	0	0	0	0	1	2.5	1	7.69	0	0	0	0	0	0			0	0	0	0	0	0	0	0	0	0			0	0	0	0	0	0	0	0	0	0
Vinorelbine	0	0	0	0	0	0	0	0	0	0	0	0	0	0	0	0	0	0	0	0	0	0			0	0	0	0	0	0	0	0	0	0			0	0	0	0	0	0	0	0	0	0
Pegylated Liposomal Doxorubicin	2	1.01	1	1.33	0	0	0	0	0	0	0	0	0	0	0	0	0	0	0	0	0	0			0	0	0	0	0	0	2	12.5	0	0			0	0	0	0	0	0	0	0	0	0
Daunorubicine	0	0	1	1.33	0	0	0	0	0	0	0	0	0	0	0	0	0	0	0	0	0	0			0	0	0	0	0	0	0	0	1	25			0	0	0	0	0	0	0	0	0	0
Following current ESMO treatment guidelines during first-line
Number of cycles during therapy lined (Known number of cycles)	185	100	68	100	9	100	57	100	27	100	6	100	35	100	9	100	0	100	24	100	8	100	0	100	14	100	4	100	1	100	14	100	3	100	0	100	31	100	13	100	2	100	10	100	4	100	0	100
Mean (SD)	5.96	3.02	5.99	2.73	6.56	5	5.44	1.18	6.37	3.03	7.33	6.06	5.6	1.48	5.44	2.4			6.13	1.33	4.5	2.27			5.14	1.23	9.5	2.52	4		8	9.03	4.67	3.06			6.61	3.21	5.77	1.88	5.5	2.12	6	0	5.75	2.5
Median	6		6		5		6		6		5.5		6		4				6		6				6		10		4		6		4				6		6		5.5		6		5.5
IQR (Q1, Q3)	6	6	4	6.5	4	7	6	6	5	7	4	8	5	6	4	8			6	6	2.5	6			4	6	8	11	4	4	6	6	2	8			6	6	6	6	4	7	6	6	4	7.5
(min, max)	1	39	1	15	2	19	1	6	2	15	2	19	3	12	2	9			4	12	1	6			3	6	6	12	4	4	3	39	2	8			1	18	2	10	4	7	6	6	3	9
Distribution
1	2	1.08	2	2.94	0	0	1	1.75	0	0	0	0	0	0	0	0	0		0	0	2	25	0		0	0	0	0	0	0	0	0	0	0	0		1	3.23	0	0	0	0	0	0	0	0	0
2	2	1.08	4	5.88	1	11.11	2	3.51	1	3.7	1	16.67	0	0	1	11.11	0		0	0	0	0	0		0	0	0	0	0	0	0	0	1	33.33	0		0	0	1	7.69	0	0	0	0	0	0	0
3	7	3.78	4	5.88	0	0	1	1.75	2	7.41	0	0	2	5.71	0	0	0		0	0	0	0	0		2	14.29	0	0	0	0	2	14.29	0	0	0		0	0	1	7.69	0	0	0	0	1	25	0
4	19	10.27	9	13.24	3	33.33	7	12.28	3	11.11	1	16.67	6	17.14	4	44.44	0		1	4.17	1	12.5	0		3	21.43	0	0	1	100	1	7.14	1	33.33	0		1	3.23	0	0	1	50	0	0	0	0	0
5	8	4.32	4	5.88	1	11.11	2	3.51	2	7.41	1	16.67	2	5.71	0	0	0		1	4.17	0	0	0		0	0	0	0	0	0	0	0	0	0	0		3	9.68	1	7.69	0	0	0	0	1	25	0
6	139	75.14	28	41.18	1	11.11	44	77.19	12	44.44	1	16.67	24	68.57	1	11.11	0		21	87.5	5	62.5	0		9	64.29	1	25	0	0	8	57.14	0	0	0		23	74.19	8	61.54	0	0	10	100	1	25	0
7+	8	4.32	17	25	3	33.33	0	0	7	25.93	2	33.33	1	2.86	3	33.33	0		1	4.17	0	0	0		0	0	3	75	0	0	3	21.43	1	33.33	0		3	9.68	2	15.38	1	50	0	0	1	25	0
Best response according to RECIST
Complete response	8	4.02	1	1.33	0	0	5	8.2	0	0	0	0	1	2.5	1	7.69	0	0	0	0	0	0			0	0	0	0	0	0	1	6.25	0	0			1	3.03	0	0	0	0	0	0	0	0
Partial response	94	47.24	32	42.67	3	27.27	32	52.46	11	40.74	2	28.57	16	40	6	46.15	0	0	10	41.67	5	50			4	28.57	1	25	0	0	8	50	2	50			20	60.61	6	46.15	1	50	4	36.36	1	25
Stable disesae (demonstrated by a scan at = 3 months)	69	34.67	24	32	5	45.45	16	26.23	11	40.74	4	57.14	16	40	0	0	1	100	11	45.83	3	30			6	42.86	2	50	0	0	6	37.5	0	0			7	21.21	5	38.46	0	0	7	63.64	3	75
No response/progression of disease	27	13.57	15	20	2	18.18	8	13.11	5	18.52	0	0	6	15	6	46.15	0	0	3	12.5	1	10			4	28.57	1	25	1	100	1	6.25	1	25			5	15.15	1	7.69	1	50	0	0	0	0
Dont know	1	0.5	3	4	1	9.09	0	0	0	0	1	14.29	1	2.5	0	0	0	0	0	0	1	10			0	0	0	0	0	0	0	0	1	25			0	0	1	7.69	0	0	0	0	0	0
Reason for discontinuation of treatment regimen
Adverse event	2	1.01	3	4	1	9.09	1	1.64	2	7.41	1	14.29	0	0	0	0	0	0	0	0	1	10			0	0	0	0	0	0	0	0	0	0			1	3.03	0	0	0	0	0	0	0	0
Patient decision	8	4.02	2	2.67	2	18.18	1	1.64	1	3.7	2	28.57	1	2.5	0	0	0	0	0	0	0	0			1	7.14	0	0	0	0	1	6.25	0	0			4	12.12	0	0	0	0	0	0	1	25
Progressive disease	39	19.6	18	24	3	27.27	8	13.11	4	14.81	1	14.29	6	15	4	30.77	0	0	5	20.83	4	40			4	28.57	1	25	1	100	6	37.5	1	25			9	27.27	3	23.08	1	50	1	9.09	1	25
Completion of planned course of treatment	146	73.37	36	48	0	0	49	80.33	16	59.26	0	0	32	80	4	30.77	0	0	18	75	5	50			9	64.29	1	25	0	0	8	50	0	0			21	63.64	9	69.23	0	0	9	81.82	1	25
Death	1	0.5	0	0	0	0	0	0	0	0	0	0	0	0	0	0	0	0	0	0	0	0			0	0	0	0	0	0	1	6.25	0	0			0	0	0	0	0	0	0	0	0	0
Loss to follow-up	4	2.01	16	21.33	6	54.55	1	1.64	6	22.22	4	57.14	0	0	2	15.38	1	100	1	4.17	0	0			0	0	2	50	0	0	0	0	3	75			1	3.03	1	7.69	1	50	1	9.09	2	50
Other	3	1.51	2	2.67	0	0	2	3.28	0	0	0	0	1	2.5	1	7.69	0	0	0	0	1	10			0	0	0	0	0	0	0	0	0	0			0	0	0	0	0	0	0	0	0	0
Don't know	3	1.51	2	2.67	0	0	1	1.64	0	0	0	0	1	2.5	2	15.38	0	0	0	0	0	0			0	0	0	0	0	0	1	6.25	0	0			0	0	0	0	0	0	0	0	0	0
Time from discontinuation of previous line to initiation of second- or subsequent line of therapy, months
Mean (SD)			7.19	5.9	3.25	1.92			8.27	7.13	3.2	2.03			5.31	3.55	4.2				5.14	4.42					8.04	6.54	0.93				14.76	9.02					5.6	3.23	4.08	2.14			7.89	3.95
Median			5.83		3.3				6.3		3.3				5.13		4.2				5.23						7.58		0.93				16.7						5		4.08				7.12
IQR (Q1, Q3)			3	9.57	0.93	5.3			3.27	10.87	0.7	5.3			2.3	7	4.2	4.2			0.77	6.1					2.57	13.52	0.93	0.93			8.07	21.45					3	7.47	2.57	5.6			5.37	10.42
Min, Max			0.7	30.8	0.7	5.6			0.87	30.8	0.7	5.4			0.7	12.8	4.2	4.2			0.7	15.37					1.63	15.37	0.93	0.93			2.6	23.03					1.87	12.13	2.57	5.6			3.97	13.37
Total duration of therapy line, months
Mean (SD)	5.2	3.75	4.54	2.04	3.16	1.89	4.61	1.68	4.19	1.33	3.23	2.5	4.44	1.84	4.67	2.15			5.49	1.51	4.01	2.16			3.53	1.29	5.72	2.14	2.1		7.88	9.2	1.37				6.35	5.21	5.3	2.76	4		5.51	1	5.83	1.32
Median	4.67		4.4		4		4.37		4.07		4.17		4.03		4.2				5.17		4.93				4		5.72		2.1		5.7		1.37				4.87		4.33		4		5.37		5.83
IQR (Q1, Q3)	3.97	5.77	3.5	5.37	2.1	4.17	3.98	5.17	3.53	5.07	0.4	5.13	3.17	5.12	3.3	6.77			4.43	6.03	3.3	5.3			2.33	4.4	4.2	7.23	2.1	2.1	4.4	7.22	1.37	1.37			3.98	6.4	3.5	5.45	4	4	4.67	6.3	4.9	6.77
Min, Max	0	41.33	0	12.4	0.4	5.13	0	11	0.93	7.07	0.4	5.13	1.4	12.17	0.7	7.93			3.03	9.3	0	6.03			1.6	5.87	4.2	7.23	2.1	2.1	1	41.33	1.37	1.37			0.23	27.43	3.03	12.4	4	4	4.2	7.2	4.9	6.77
Time from initiation of line of therapy to disease progression, months
Mean (SD)	9.64	7.47	6.38	3.38	3.58	0.85	9.32	6.5	6.58	2.85	4.13		8.73	6.88	6.17	3.42			8.95	4.08	4.92	4.68			8.38	6.11	7.63	0.57	2.6		16.73	16.49	1.83				8.88	5.72	7.8	2.96	4		10.95	3.34	7.12	3.13
Median	8.3		6.98		4		8.52		7		4.13		7.95		6.42				8.25		8.13				7.03		7.63		2.6		10.47		1.83				7.93		8.37		4		10.73		7.12
IQR (Q1, Q3)	6.05	12	3.87	8.95	2.6	4.13	5.6	10.13	4.87	8.87	4.13	4.13	5.13	11.2	3.77	7.67			6.13	9.97	0	8.83			2.8	13.03	7.23	8.03	2.6	2.6	7	23.1	1.83	1.83			6.3	12.17	6.03	9.1	4	4	8.28	12.37	4.9	9.33
Min, Max	0	55.27	0	12.63	2.6	4.13	0	36.1	1.13	10.03	4.13	4.13	0	41.07	1.03	12.63			2.53	18.47	0	9.5			1.7	20	7.23	8.03	2.6	2.6	0	55.27	1.83	1.83			0	27.43	2.5	12.17	4	4	7.27	17.57	4.9	9.33
Total follow-up time among patients who died during the follow-up period, months (n,%)
n (%)	133	66.83	37	49.33	3	27.27	34	55.74	9	33.33	1	14.29	29	72.5	8	61.54			20	83.33	8	80			12	85.71	2	50	1	100	10	62.5	1	25			23	69.7	8	61.54	1	50	5	45.45	1	25
Mean (SD)	17.78	11.02	21.68	9.14	20.79	0.63	19.02	11.95	21.31	7.13	21.07		15.8	9.9	19.03	9.66			16.54	7.29	21.93	6.08			15.74	12.52	18.38	4.03	21.23		23.46	19.34	51.97				18.32	8.6	22.38	9.45	20.07		16.73	8.23	14.97
Median	16.17		20.3		21.07		16.38		20.3		21.07		15.77		17.83				18.08		21.57				15.88		18.38		21.23		19		51.97				18.27		21.12		20.07		14.77		14.97
IQR (Q1, Q3)	10.37	21.23	15.97	22.27	20.07	21.23	12.17	21.77	17	21.23	21.07	21.07	9.87	18.43	14.28	23.47			9.6	21.57	20.08	25.77			6.02	19.92	15.53	21.23	21.23	21.23	10.2	22	51.97	51.97			11.67	22.2	17.52	22.23	20.07	20.07	11.9	14.97	14.97	14.97
Min, Max	2.57	73.6	4.27	51.97	20.07	21.23	5.9	73.6	13.37	33.43	21.07	21.07	2.57	41.8	4.27	36.8			6.67	30.23	10.37	30.23			4.1	49.73	15.53	21.23	21.23	21.23	3.9	64.2	51.97	51.97			8.37	44.27	13	44.27	20.07	20.07	10.9	31.1	14.97	14.97
Total follow-up time among patients alive at the end of the follow-up period, months (n,%)
n (%)	59	29.65	37	49.33	8	72.73	24	39.34	18	66.67	6	85.71	10	25	5	38.46	1	100	3	12.5	1	10			2	14.29	2	50	0	0	6	37.5	3	75			8	24.24	5	38.46	1	50	6	54.55	3	75
Mean (SD)	34.42	13.04	34.78	13.53	35.05	15.66	36.16	11.79	35.49	12.33	36.89	17.92	31.55	17.5	33.67	21.32	25.67		35.88	14.31	41.05	22.42			42.72	27.08	42.72	27.08			28.17	3.49	29.52	2.91			37.07	15.38	35.67	12.16	33.4		29.99	4.38	26.69	3.39
Median	31.2		30.7		29.53		33.97		32.7		29.7		25.67		25.67		25.67		30.72		41.05				42.72		42.72				29.17		31.17				31.92		31.97		33.4		30.8		25.2
IQR (Q1, Q3)	25.2	40.07	25.43	39.8	25.43	37.63	25.43	44.1	25.43	41.3	25.43	41.3	20.57	40.07	21	29.9	25.67	25.67	27.17	44.6	25.2	56.9			23.57	61.87	23.57	61.87			26.17	31.17	26.17	31.23			25.43	56.73	30.8	33.4	33.4	33.4	25.2	34.1	24.3	30.57
Min, Max	9.33	71.2	20.57	71.2	24.3	70.9	20.57	70.9	21.33	70.9	24.3	70.9	9.33	71.2	20.57	71.2	25.67	25.67	25.2	56.9	25.2	56.9			23.57	61.87	23.57	61.87			22.13	31.23	26.17	31.23			20.07	61.57	25.43	56.73	33.4	33.4	24.3	34.73	24.3	30.57
Total follow-up time among ALL patients, months
Mean (SD)	23.3	14.09	28.32	13.25	31.16	14.7	26.61	14.58	30.76	12.7	34.63	17.42	20.13	14.13	24.66	16.16	25.67		19.76	11.18	25.75	12.23			19.6	16.88	30.55	21.15	21.23		25.23	15.3	35.13	11.47			24	13.92	27.49	12.11	26.73	9.43	23.96	9.2	23.76	6.48
Median	20.57		25.2		25.43		23.83		29.87		25.43		16.88		20.57		25.67		19.75		22.42				16.62		22.4		21.23		22.07		31.2				21.27		22.27		26.73		25.2		24.75
IQR (Q1, Q3)	13.13	30.57	20.3	32.4	21.23	33.97	15.53	33.43	21.23	37.83	24.3	41.3	11.13	25.57	17.23	27.17	25.67	25.67	10.35	24.57	20.93	28.77			6.67	21.23	18.38	42.72	21.23	21.23	15.55	30.22	28.67	41.6			13.1	30.8	20.07	31.97	20.07	33.4	14.77	31.1	19.63	27.88
Min, Max	2.57	73.6	4.27	71.2	20.07	70.9	5.9	73.6	13.37	70.9	21.07	70.9	2.57	71.2	4.27	71.2	25.67	25.67	6.67	56.9	10.37	56.9			4.1	61.87	15.53	61.87	21.23	21.23	3.9	64.2	26.17	51.97			8.37	61.57	13	56.73	20.07	33.4	10.9	34.73	14.97	30.57
Use of supportive/palliative medications during line of treatment
Pain control	95	47.74	43	57.33	7	63.64	26	42.62	12	44.44	5	71.43	16	40	7	53.85	0	0	13	54.17	8	80			9	64.29	2	50	1	100	7	43.75	2	50			18	54.55	10	76.92	1	50	6	54.55	2	50
Antiemetics	81	40.7	38	50.67	6	54.55	29	47.54	14	51.85	5	71.43	14	35	3	23.08	0	0	10	41.67	7	70			7	50	3	75	1	100	5	31.25	0	0			14	42.42	9	69.23	0	0	2	18.18	2	50
Antibiotics	17	8.54	9	12	0	0	3	4.92	4	14.81	0	0	3	7.5	1	7.69	0	0	1	4.17	1	10			3	21.43	1	25	0	0	2	12.5	0	0			4	12.12	1	7.69	0	0	1	9.09	1	25
Antifungals	7	3.52	4	5.33	2	18.18	1	1.64	2	7.41	2	28.57	1	2.5	0	0	0	0	1	4.17	0	0			1	7.14	1	25	0	0	1	6.25	0	0			1	3.03	0	0	0	0	1	9.09	1	25
Antivirals	0	0	0	0	0	0	0	0	0	0	0	0	0	0	0	0	0	0	0	0	0	0			0	0	0	0	0	0	0	0	0	0			0	0	0	0	0	0	0	0	0	0
Dexrazoxane	0	0	0	0	0	0	0	0	0	0	0	0	0	0	0	0	0	0	0	0	0	0			0	0	0	0	0	0	0	0	0	0			0	0	0	0	0	0	0	0	0	0
Transfusions	17	8.54	5	6.67	2	18.18	8	13.11	3	11.11	2	28.57	2	5	1	7.69	0	0	2	8.33	0	0			1	7.14	0	0	0	0	2	12.5	0	0			2	6.06	0	0	0	0	0	0	1	25
Antianxiety, antidepressant drugs	9	4.52	1	1.33	0	0	2	3.28	1	3.7	0	0	2	5	0	0	0	0	0	0	0	0			1	7.14	0	0	0	0	0	0	0	0			2	6.06	0	0	0	0	2	18.18	0	0
Growth factors	12	6.03	6	8	1	9.09	3	4.92	2	7.41	1	14.29	1	2.5	1	7.69	0	0	1	4.17	0	0			1	7.14	1	25	0	0	1	6.25	0	0			3	9.09	1	7.69	0	0	2	18.18	1	25
Bisphosphonates	1	0.5	0	0	0	0	0	0	0	0	0	0	0	0	0	0	0	0	0	0	0	0			1	7.14	0	0	0	0	0	0	0	0			0	0	0	0	0	0	0	0	0	0
Referral to psychiatrist, psychologist, or other professional for distress management	6	3.02	1	1.33	0	0	2	3.28	0	0	0	0	1	2.5	0	0	0	0	0	0	1	10			3	21.43	0	0	0	0	0	0	0	0			0	0	0	0	0	0	0	0	0	0
Oxygen	10	5.03	0	0	1	9.09	3	4.92	0	0	1	14.29	2	5	0	0	0	0	0	0	0	0			1	7.14	0	0	0	0	1	6.25	0	0			2	6.06	0	0	0	0	1	9.09	0	0
Radiation therapy, excluding utilization for pain control	2	1.01	2	2.67	1	9.09	1	1.64	1	3.7	1	14.29	0	0	0	0	0	0	0	0	0	0			1	7.14	0	0	0	0	0	0	0	0			0	0	1	7.69	0	0	0	0	0	0
Nutritional support	27	13.57	7	9.33	3	27.27	13	21.31	4	14.81	3	42.86	2	5	1	7.69	0	0	1	4.17	0	0			1	7.14	0	0	0	0	3	18.75	1	25			6	18.18	1	7.69	0	0	1	9.09	0	0
Corticosteroids, except for utilization for pain control	22	11.06	10	13.33	0	0	6	9.84	4	14.81	0	0	6	15	4	30.77	0	0	1	4.17	0	0			3	21.43	1	25	0	0	3	18.75	0	0			1	3.03	0	0	0	0	2	18.18	1	25
Patient did not receive any supportive care	28	14.07	5	6.67	1	9.09	8	13.11	1	3.7	0	0	8	20	2	15.38	1	100	5	20.83	1	10			2	14.29	0	0	0	0	2	12.5	0	0			1	3.03	0	0	0	0	2	18.18	1	25
Others	0	0	1	1.33	0	0	0	0	0	0	0	0	0	0	0	0	0	0	0	0	0	0			0	0	0	0	0	0	0	0	0	0			0	0	0	0	0	0	0	0	1	25
Don’t know	37	18.59	6	8	1	9.09	7	11.48	2	7.41	0	0	14	35	2	15.38	0	0	1	4.17	0	0			2	14.29	0	0	0	0	3	18.75	1	25			9	27.27	1	7.69	1	50	1	9.09	0	0
Treatment for pain control among those who received supportive/palliative care during line of treatment
Opiate analgesics	81	85.26	39	90.7	6	85.71	20	76.92	12	100	5	100	14	87.5	7	100	0		13	100	8	100			8	88.89	2	100	1	100	6	85.71	1	50			15	83.33	7	70	0	0	5	83.33	2	100
Other analgesics	50	52.63	31	72.09	6	85.71	14	53.85	8	66.67	4	80	10	62.5	3	42.86	0		6	46.15	7	87.5			5	55.56	2	100	1	100	3	42.86	1	50			10	55.56	9	90	1	100	2	33.33	1	50
Radiotherapy	7	7.37	6	13.95	1	14.29	2	7.69	3	25	1	20	2	12.5	2	28.57	0		1	7.69	0	0			0	0	0	0	0	0	0	0	0	0			0	0	1	10	0	0	2	33.33	0	0
Psychological intervention	5	5.26	0	0	0	0	2	7.69	0	0	0	0	1	6.25	0	0	0		0	0	0	0			1	11.11	0	0	0	0	1	14.29	0	0			0	0	0	0	0	0	0	0	0	0
Sedation for refractory pain	2	2.11	1	2.33	0	0	1	3.85	0	0	0	0	1	6.25	0	0	0		0	0	1	12.5			0	0	0	0	0	0	0	0	0	0			0	0	0	0	0	0	0	0	0	0
Epidural infusions	0	0	0	0	0	0	0	0	0	0	0	0	0	0	0	0	0		0	0	0	0			0	0	0	0	0	0	0	0	0	0			0	0	0	0	0	0	0	0	0	0
Splanchnic nerve block	0	0	0	0	0	0	0	0	0	0	0	0	0	0	0	0	0		0	0	0	0			0	0	0	0	0	0	0	0	0	0			0	0	0	0	0	0	0	0	0	0
Other treatment	0	0	1	2.33	0	0	0	0	1	8.33	0	0	0	0	0	0	0		0	0	0	0			0	0	0	0	0	0	0	0	0	0			0	0	0	0	0	0	0	0	0	0
Don’t know	0	0	0	0	0	0	0	0	0	0	0	0	0	0	0	0	0		0	0	0	0			0	0	0	0	0	0	0	0	0	0			0	0	0	0	0	0	0	0	0	0
Type of transfusions among those who received supportive/palliative care during line of treatment
Red blood cell transfusion	16	94.12	5	100	2	100	7	87.5	3	100	2	100	2	100	1	100	0		2	100	0				1	100	0		0		2	100	0				2	100	0		0		0		1	100
Platelet transfusion	4	23.53	3	60	0	0	1	12.5	2	66.67	0	0	1	50	0	0	0		0	0	0				0	0	0		0		1	50	0				1	50	0		0		0		1	100
Other transfusion typesl to be added based upon actual data	0	0	0	0	0	0	0	0	0	0	0	0	0	0	0	0	0		0	0	0				0	0	0		0		0	0	0				0	0	0		0		0		0	0
Don’t know	1	5.88	0	0	0	0	1	12.5	0	0	0	0	0	0	0	0	0		0	0	0				0	0	0		0		0	0	0				0	0	0		0		0		0	0
Diagnostic tests as part of supportive care during line of treatment
Computed tomography (CT) scan	179	89.95	67	89.33	11	100	57	93.44	25	92.59	7	100	31	77.5	10	76.92	1	100	22	91.67	10	100			14	100	4	100	1	100	14	87.5	2	50			32	96.97	13	100	2	100	9	81.82	3	75
Positron emission tomography (PET) scan (whole body)	18	9.05	1	1.33	0	0	4	6.56	1	3.7	0	0	2	5	0	0	0	0	9	37.5	0	0			0	0	0	0	0	0	0	0	0	0			3	9.09	0	0	0	0	0	0	0	0
GI endoscope	9	4.52	0	0	0	0	2	3.28	0	0	0	0	3	7.5	0	0	0	0	0	0	0	0			2	14.29	0	0	0	0	0	0	0	0			2	6.06	0	0	0	0	0	0	0	0
Magnetic Resonance Imaging (MRI)	25	12.56	5	6.67	2	18.18	9	14.75	2	7.41	1	14.29	4	10	1	7.69	0	0	2	8.33	1	10			2	14.29	0	0	1	100	2	12.5	1	25			5	15.15	0	0	0	0	1	9.09	0	0
Multi Gated Acquisition Scan (MUGA)	16	8.04	4	5.33	0	0	7	11.48	3	11.11	0	0	3	7.5	0	0	0	0	0	0	1	10			3	21.43	0	0	0	0	1	6.25	0	0			2	6.06	0	0	0	0	0	0	0	0
No diagnostic tests performed as part of their supportive care during this period	4	2.01	4	5.33	0	0	0	0	1	3.7	0	0	2	5	1	7.69	0	0	0	0	0	0			0	0	0	0	0	0	1	6.25	1	25			0	0	0	0	0	0	1	9.09	1	25
Don’t know	7	3.52	3	4	0	0	0	0	0	0	0	0	5	12.5	2	15.38	0	0	0	0	0	0			0	0	0	0	0	0	1	6.25	1	25			0	0	0	0	0	0	1	9.09	0	0

## Sheet: Tx (Spain)
Table B-8. Treatment Characteristics of Advanced Soft Tissue Sarcoma by Line of Therapy: Spain
	Total						Leiomyosarcomas						Others / NOS						Fibroblastic/Myofibroblastic						Liposarcomas						Vascular sarcomas						Rhabdomyosarcomas						Synovial sarcoma
Characteristic	First line		Second line		Third line		First line		Second line		Third line		First line		Second line		Third line		First line		Second line		Third line		First line		Second line		Third line		First line		Second line		Third line		First line		Second line		Third line		First line		Second line		Third line
	N	%	N	%	N	%	N	%	N	%	N	%	N	%	N	%	N	%	N	%	N	%	N	%	N	%	N	%	N	%	N	%	N	%	N	%	N	%	N	%	N	%	N	%	N	%	N	%
Patients receiving nth-line therapy	203	100	86	100	20	100	45	100	27	100	9	100	35	100	18	100	3	100	18	100	3	100	2	100	44	100	18	100	4	100	25	100	7	100	1	100	20	100	6	100	1	100	16	100	7	100	0
Weight in Kg at start of therapy line (Known weight)	155	100	71	100	19	100	35	100	23	100	8	100	30	100	15	100	3	100	15	100	3	100	2	100	28	100	14	100	4	100	18	100	6	100	1	100	17	100	5	100	1	100	12	100	5	100	0
Mean (SD)	69.26	10.26	65.37	9.9	67.26	10.28	66.37	10.69	65	9.19	68.75	7.11	66.1	8.52	60.73	8.88	63.33	9.61	70.47	7.56	71.67	10.97	65	14.14	68.68	9	64.21	8.01	60.5	11.24	76.11	11.65	75.17	12.27	79		70	10.29	66.8	14.13	87		74.08	11.6	67.2	7.29
Median	69		68		67		67		67		67.5		67.5		65		65		71		78		65		69		67		59		76		79.5		79		68		68		87		73.5		68
IQR (Q1, Q3)	62	76	56	71	57	75	60	73	59	70	65	74	60	72	53	69	53	72	65	76	59	78	55	75	60.5	75.5	58	70	52	69	67	84	75	81	79	79	61	77	59	69	87	87	67.5	79	66	70
(min, max)	45	102	46	88	49	87	45	94	49	84	57	80	50	80	46	74	53	72	55	81	59	78	55	75	55	86	51	76	49	75	55	98	51	85	79	79	54	90	50	88	87	87	58	102	56	76
Body surface area at start of therapy line (Known BSA)	144	100	67	100	18	100	32	100	21	100	8	100	29	100	14	100	2	100	14	100	3	100	2	100	25	100	14	100	4	100	17	100	6	100	1	100	16	100	4	100	1	100	11	100	5	100	0
Mean (SD)	1.79	0.16	1.74	0.16	1.76	0.16	1.74	0.17	1.71	0.16	1.79	0.12	1.75	0.14	1.66	0.15	1.67	0.28	1.82	0.13	1.84	0.16	1.73	0.18	1.79	0.15	1.74	0.13	1.67	0.17	1.89	0.19	1.88	0.21	1.99		1.82	0.13	1.8	0.16	2		1.88	0.18	1.79	0.11
Median	1.8		1.76		1.78		1.75		1.74		1.78		1.75		1.66		1.67		1.86		1.89		1.73		1.75		1.77		1.65		1.88		1.99		1.99		1.81		1.79		2		1.87		1.81
IQR (Q1, Q3)	1.69	1.9	1.62	1.87	1.61	1.88	1.66	1.85	1.62	1.82	1.7	1.88	1.65	1.86	1.55	1.76	1.48	1.87	1.75	1.91	1.66	1.96	1.6	1.85	1.68	1.89	1.64	1.83	1.55	1.79	1.75	2.05	1.84	2.01	1.99	1.99	1.71	1.9	1.7	1.91	2	2	1.74	1.95	1.77	1.87
(min, max)	1.37	2.3	1.45	2.02	1.48	2	1.37	2.01	1.45	2.01	1.61	1.97	1.48	1.97	1.45	1.9	1.48	1.87	1.55	1.98	1.66	1.96	1.6	1.85	1.57	2.06	1.51	1.93	1.48	1.88	1.54	2.2	1.47	2.02	1.99	1.99	1.63	2.06	1.62	2.01	2	2	1.64	2.3	1.62	1.88
Performance Status at start of therapy line
Performance Status measured on the ECOG scale
Mean (SD)	1.38	0.68	1.48	0.7	1.5	0.69	1.27	0.81	1.41	0.8	1.11	0.78	1.49	0.66	1.72	0.67	1.67	0.58	1.22	0.81	0.67	0.58	2	0	1.48	0.55	1.44	0.62	1.75	0.5	1.28	0.68	1.14	0.69	2		1.5	0.69	1.67	0.52	2		1.44	0.51	1.71	0.49
Median	1		2		2		1		2		1		2		2		2		1		1		2		1.5		1.5		2		1		1		2		1.5		2		2		1		2
IQR (Q1, Q3)	1	2	1	2	1	2	1	2	1	2	1	2	1	2	1	2	1	2	1	2	0	1	2	2	1	2	1	2	1.5	2	1	2	1	2	2	2	1	2	1	2	2	2	1	2	1	2
(min, max)	0	3	0	3	0	2	0	2	0	3	0	2	0	3	1	3	1	2	0	2	0	1	2	2	0	2	0	2	1	2	0	2	0	2	2	2	0	3	1	2	2	2	1	2	1	2
Distribution
0=Fully active, able to carry on all pre-disease performance without restriction	21	10.34	7	8.14	2	10	10	22.22	4	14.81	2	22.22	2	5.71	0	0	0	0	4	22.22	1	33.33	0	0	1	2.27	1	5.56	0	0	3	12	1	14.29	0	0	1	5	0	0	0	0	0	0	0	0	0
1=Restricted in physically strenuous activity but ambulatory	85	41.87	34	39.53	6	30	13	28.89	9	33.33	4	44.44	15	42.86	7	38.89	1	33.33	6	33.33	2	66.67	0	0	21	47.73	8	44.44	1	25	12	48	4	57.14	0	0	9	45	2	33.33	0	0	9	56.25	2	28.57	0
2=Ambulatory and capable of all self-care but unable to carry out any work	95	46.8	42	48.84	12	60	22	48.89	13	48.15	3	33.33	17	48.57	9	50	2	66.67	8	44.44	0	0	2	100	22	50	9	50	3	75	10	40	2	28.57	1	100	9	45	4	66.67	1	100	7	43.75	5	71.43	0
3=Capable of only limited self-care, confined to bed or chair more than 50% of waking hours	2	0.99	3	3.49	0	0	0	0	1	3.7	0	0	1	2.86	2	11.11	0	0	0	0	0	0	0	0	0	0	0	0	0	0	0	0	0	0	0	0	1	5	0	0	0	0	0	0	0	0	0
4=Completely disabled. Cannot carry on any self-care. Totally confined to bed or chair	0	0	0	0	0	0	0	0	0	0	0	0	0	0	0	0	0	0	0	0	0	0	0	0	0	0	0	0	0	0	0	0	0	0	0	0	0	0	0	0	0	0	0	0	0	0	0
Dont know	0	0	0	0	0	0	0	0	0	0	0	0	0	0	0	0	0	0	0	0	0	0	0	0	0	0	0	0	0	0	0	0	0	0	0	0	0	0	0	0	0	0	0	0	0	0	0
Use of cancer-directed treatments during therapy line
Overall
Chemotherapy	200	100	74	100	14	100	45	100	23	100	7	100	33	100	15	100	1	100	18	100	3	100	1	100	44	100	18	100	4	100	25	100	6	100	1	100	19	100	4	100	0		16	100	5	100	0
Biologic therapy	0		0		0		0		0		0		0		0		0		0		0		0		0		0		0		0		0		0		0		0		0		0		0		0
Targeted therapy	3	100	12	100	6	100	0		4	100	2	100	2	100	3	100	2	100	0		0		1	100	0		0		0		0		1	100	0		1	100	2	100	1	100	0		2	100	0
Single class of agents
Chemotherapy only	200	100	74	100	14	100	45	100	23	100	7	100	33	100	15	100	1	100	18	100	3	100	1	100	44	100	18	100	4	100	25	100	6	100	1	100	19	100	4	100	0		16	100	5	100	0
Biologic therapy only	0		0		0		0		0		0		0		0		0		0		0		0		0		0		0		0		0		0		0		0		0		0		0		0
Targeted therapy only	3	100	12	100	6	100	0		4	100	2	100	2	100	3	100	2	100	0		0		1	100	0		0		0		0		1	100	0		1	100	2	100	1	100	0		2	100	0
Combination of classes of agents
Chemotherapy + biologic therapyb	0		0		0		0		0		0		0		0		0		0		0		0		0		0		0		0		0		0		0		0		0		0		0		0
Chemotherapy + targeted therapyc	0		0		0		0		0		0		0		0		0		0		0		0		0		0		0		0		0		0		0		0		0		0		0		0
Biologic therapyb + targeted therapyc	0		0		0		0		0		0		0		0		0		0		0		0		0		0		0		0		0		0		0		0		0		0		0		0
Chemotherapy + biologic therapyb + targeted therapyc	0		0		0		0		0		0		0		0		0		0		0		0		0		0		0		0		0		0		0		0		0		0		0		0
Use of selected chemotherapies during therapy line
Bevacizumab	0	0	0	0	0	0	0	0	0	0	0	0	0	0	0	0	0	0	0	0	0	0	0	0	0	0	0	0	0	0	0	0	0	0	0	0	0	0	0	0	0	0	0	0	0	0	0
Carboplatin	5	2.46	0	0	0	0	1	2.22	0	0	0	0	1	2.86	0	0	0	0	0	0	0	0	0	0	1	2.27	0	0	0	0	0	0	0	0	0	0	2	10	0	0	0	0	0	0	0	0	0
Cisplatin	4	1.97	1	1.16	0	0	0	0	0	0	0	0	0	0	0	0	0	0	2	11.11	0	0	0	0	1	2.27	0	0	0	0	0	0	0	0	0	0	0	0	1	16.67	0	0	1	6.25	0	0	0
Crizotinib	0	0	1	1.16	0	0	0	0	0	0	0	0	0	0	0	0	0	0	0	0	0	0	0	0	0	0	0	0	0	0	0	0	0	0	0	0	0	0	1	16.67	0	0	0	0	0	0	0
Cyclophosphamide	6	2.96	0	0	0	0	0	0	0	0	0	0	0	0	0	0	0	0	1	5.56	0	0	0	0	3	6.82	0	0	0	0	1	4	0	0	0	0	1	5	0	0	0	0	0	0	0	0	0
Dacarbazine	2	0.99	5	5.81	1	5	1	2.22	1	3.7	0	0	0	0	2	11.11	0	0	1	5.56	0	0	0	0	0	0	1	5.56	1	25	0	0	0	0	0	0	0	0	0	0	0	0	0	0	1	14.29	0
Dactinomycin	1	0.49	0	0	0	0	0	0	0	0	0	0	0	0	0	0	0	0	0	0	0	0	0	0	0	0	0	0	0	0	0	0	0	0	0	0	1	5	0	0	0	0	0	0	0	0	0
Docetaxel	27	13.3	17	19.77	2	10	15	33.33	3	11.11	2	22.22	2	5.71	3	16.67	0	0	0	0	2	66.67	0	0	4	9.09	4	22.22	0	0	4	16	2	28.57	0	0	2	10	2	33.33	0	0	0	0	1	14.29	0
Doxorubicin	110	54.19	10	11.63	1	5	16	35.56	5	18.52	0	0	24	68.57	1	5.56	1	33.33	13	72.22	0	0	0	0	30	68.18	0	0	0	0	10	40	2	28.57	0	0	10	50	0	0	0	0	7	43.75	2	28.57	0
Epirubicin	20	9.85	0	0	0	0	5	11.11	0	0	0	0	3	8.57	0	0	0	0	3	16.67	0	0	0	0	4	9.09	0	0	0	0	0	0	0	0	0	0	3	15	0	0	0	0	2	12.5	0	0	0
Etoposide	1	0.49	0	0	0	0	0	0	0	0	0	0	0	0	0	0	0	0	0	0	0	0	0	0	0	0	0	0	0	0	0	0	0	0	0	0	1	5	0	0	0	0	0	0	0	0	0
Everolimus	1	0.49	0	0	0	0	0	0	0	0	0	0	0	0	0	0	0	0	0	0	0	0	0	0	0	0	0	0	0	0	0	0	0	0	0	0	1	5	0	0	0	0	0	0	0	0	0
Gemcitabine	27	13.3	17	19.77	4	20	16	35.56	3	11.11	2	22.22	3	8.57	6	33.33	0	0	0	0	2	66.67	0	0	2	4.55	1	5.56	2	50	5	20	2	28.57	0	0	1	5	1	16.67	0	0	0	0	2	28.57	0
Ifosfamide	54	26.6	20	23.26	0	0	10	22.22	8	29.63	0	0	11	31.43	5	27.78	0	0	5	27.78	1	33.33	0	0	11	25	5	27.78	0	0	2	8	0	0	0	0	5	25	0	0	0	0	10	62.5	1	14.29	0
Imatinib	1	0.49	1	1.16	0	0	0	0	0	0	0	0	1	2.86	1	5.56	0	0	0	0	0	0	0	0	0	0	0	0	0	0	0	0	0	0	0	0	0	0	0	0	0	0	0	0	0	0	0
Interferon	0	0	0	0	0	0	0	0	0	0	0	0	0	0	0	0	0	0	0	0	0	0	0	0	0	0	0	0	0	0	0	0	0	0	0	0	0	0	0	0	0	0	0	0	0	0	0
Melphalan	0	0	0	0	0	0	0	0	0	0	0	0	0	0	0	0	0	0	0	0	0	0	0	0	0	0	0	0	0	0	0	0	0	0	0	0	0	0	0	0	0	0	0	0	0	0	0
Methotrexate	0	0	1	1.16	0	0	0	0	0	0	0	0	0	0	0	0	0	0	0	0	0	0	0	0	0	0	0	0	0	0	0	0	0	0	0	0	0	0	1	16.67	0	0	0	0	0	0	0
Paclitaxel	16	7.88	4	4.65	0	0	1	2.22	1	3.7	0	0	2	5.71	0	0	0	0	1	5.56	0	0	0	0	0	0	1	5.56	0	0	10	40	2	28.57	0	0	0	0	0	0	0	0	2	12.5	0	0	0
Pazopanib	1	0.49	9	10.47	6	30	0	0	4	14.81	2	22.22	1	2.86	2	11.11	2	66.67	0	0	0	0	1	50	0	0	0	0	0	0	0	0	0	0	0	0	0	0	1	16.67	1	100	0	0	2	28.57	0
Sirolimus	0	0	0	0	0	0	0	0	0	0	0	0	0	0	0	0	0	0	0	0	0	0	0	0	0	0	0	0	0	0	0	0	0	0	0	0	0	0	0	0	0	0	0	0	0	0	0
Sorafenib	0	0	0	0	0	0	0	0	0	0	0	0	0	0	0	0	0	0	0	0	0	0	0	0	0	0	0	0	0	0	0	0	0	0	0	0	0	0	0	0	0	0	0	0	0	0	0
Sulindac	0	0	0	0	0	0	0	0	0	0	0	0	0	0	0	0	0	0	0	0	0	0	0	0	0	0	0	0	0	0	0	0	0	0	0	0	0	0	0	0	0	0	0	0	0	0	0
Sunitinib	0	0	1	1.16	0	0	0	0	0	0	0	0	0	0	0	0	0	0	0	0	0	0	0	0	0	0	0	0	0	0	0	0	1	14.29	0	0	0	0	0	0	0	0	0	0	0	0	0
Tamoxifen	0	0	0	0	0	0	0	0	0	0	0	0	0	0	0	0	0	0	0	0	0	0	0	0	0	0	0	0	0	0	0	0	0	0	0	0	0	0	0	0	0	0	0	0	0	0	0
Temozolomide	0	0	0	0	0	0	0	0	0	0	0	0	0	0	0	0	0	0	0	0	0	0	0	0	0	0	0	0	0	0	0	0	0	0	0	0	0	0	0	0	0	0	0	0	0	0	0
TNF-alpha	0	0	0	0	0	0	0	0	0	0	0	0	0	0	0	0	0	0	0	0	0	0	0	0	0	0	0	0	0	0	0	0	0	0	0	0	0	0	0	0	0	0	0	0	0	0	0
Topotecan	0	0	1	1.16	1	5	0	0	0	0	0	0	0	0	0	0	0	0	0	0	0	0	1	50	0	0	1	5.56	0	0	0	0	0	0	0	0	0	0	0	0	0	0	0	0	0	0	0
Toremifene	0	0	0	0	0	0	0	0	0	0	0	0	0	0	0	0	0	0	0	0	0	0	0	0	0	0	0	0	0	0	0	0	0	0	0	0	0	0	0	0	0	0	0	0	0	0	0
Trabectedin	2	0.99	15	17.44	8	40	1	2.22	6	22.22	5	55.56	0	0	3	16.67	0	0	0	0	0	0	0	0	1	2.27	5	27.78	2	50	0	0	0	0	1	100	0	0	1	16.67	0	0	0	0	0	0	0
Vinblastine	0	0	0	0	0	0	0	0	0	0	0	0	0	0	0	0	0	0	0	0	0	0	0	0	0	0	0	0	0	0	0	0	0	0	0	0	0	0	0	0	0	0	0	0	0	0	0
Vincristine	0	0	1	1.16	0	0	0	0	0	0	0	0	0	0	0	0	0	0	0	0	0	0	0	0	0	0	0	0	0	0	0	0	0	0	0	0	0	0	1	16.67	0	0	0	0	0	0	0
Vinorelbine	1	0.49	1	1.16	0	0	0	0	0	0	0	0	1	2.86	0	0	0	0	0	0	0	0	0	0	0	0	1	5.56	0	0	0	0	0	0	0	0	0	0	0	0	0	0	0	0	0	0	0
Pegylated Liposomal Doxorubicin	2	0.99	0	0	0	0	0	0	0	0	0	0	1	2.86	0	0	0	0	0	0	0	0	0	0	0	0	0	0	0	0	0	0	0	0	0	0	1	5	0	0	0	0	0	0	0	0	0
Bleomycin	0	0	1	1.16	0	0	0	0	0	0	0	0	0	0	0	0	0	0	0	0	0	0	0	0	0	0	0	0	0	0	0	0	0	0	0	0	0	0	1	16.67	0	0	0	0	0	0	0
Following current ESMO treatment guidelines during first-line
Number of cycles during therapy lined (Known number of cycles)	185	100	86	100	20	100	41	100	27	100	9	100	34	100	18	100	3	100	14	100	3	100	2	100	39	100	18	100	4	100	22	100	7	100	1	100	20	100	6	100	1	100	15	100	7	100	0	100
Mean (SD)	5.97	2.52	5.65	3.17	7	4.18	6	2.07	5.07	1.88	6.22	3.42	5.76	3.46	5.94	3.3	6.67	6.43	6.14	0.86	6	1	5.5	2.12	5.72	2.32	6.78	4.72	9.75	6.08	5.77	2.45	6	3.79	7		6.2	2.17	4.5	2.74	7		6.8	3.36	4.71	1.98
Median	6		5		6		6		5		5		6		4		4		6		6		5.5		6		5.5		10		6		6		7		6		4		7		6		4
IQR (Q1, Q3)	5	6	3	7	4	9.5	6	6	3	6	3	9	4	6	3	8	2	14	6	6	5	7	4	7	4	6	4	8	4.5	15	4	7	2	8	7	7	4.5	7	3	6	7	7	6	6	3	7
(min, max)	1	21	1	21	2	15	3	14	2	8	3	12	1	21	3	13	2	14	4	8	5	7	4	7	1	15	2	21	4	15	2	10	1	12	7	7	4	12	1	9	7	7	3	15	2	7
Distribution
1	3	1.62	2	2.33	0	0	0	0	0	0	0	0	2	5.88	0	0	0	0	0	0	0	0	0	0	1	2.56	0	0	0	0	0	0	1	14.29	0	0	0	0	1	16.67	0	0	0	0	0	0	0
2	8	4.32	5	5.81	1	5	0	0	2	7.41	0	0	3	8.82	0	0	1	33.33	0	0	0	0	0	0	2	5.13	1	5.56	0	0	3	13.64	1	14.29	0	0	0	0	0	0	0	0	0	0	1	14.29	0
3	11	5.95	15	17.44	3	15	6	14.63	5	18.52	3	33.33	0	0	5	27.78	0	0	0	0	0	0	0	0	1	2.56	3	16.67	0	0	2	9.09	0	0	0	0	0	0	1	16.67	0	0	2	13.33	1	14.29	0
4	22	11.89	15	17.44	4	20	2	4.88	4	14.81	1	11.11	7	20.59	5	27.78	1	33.33	1	7.14	0	0	1	50	6	15.38	2	11.11	1	25	1	4.55	0	0	0	0	5	25	2	33.33	0	0	0	0	2	28.57	0
5	14	7.57	9	10.47	2	10	2	4.88	4	14.81	1	11.11	2	5.88	0	0	0	0	0	0	1	33.33	0	0	4	10.26	3	16.67	1	25	2	9.09	1	14.29	0	0	3	15	0	0	0	0	1	6.67	0	0	0
6	86	46.49	14	16.28	0	0	22	53.66	6	22.22	0	0	13	38.24	1	5.56	0	0	10	71.43	1	33.33	0	0	19	48.72	3	16.67	0	0	7	31.82	1	14.29	0	0	6	30	1	16.67	0	0	9	60	1	14.29	0
7+	41	22.16	26	30.23	10	50	9	21.95	6	22.22	4	44.44	7	20.59	7	38.89	1	33.33	3	21.43	1	33.33	1	50	6	15.38	6	33.33	2	50	7	31.82	3	42.86	1	100	6	30	1	16.67	1	100	3	20	2	28.57	0
Best response according to RECIST
Complete response	12	5.91	0	0	0	0	1	2.22	0	0	0	0	1	2.86	0	0	0	0	2	11.11	0	0	0	0	1	2.27	0	0	0	0	4	16	0	0	0	0	2	10	0	0	0	0	1	6.25	0	0	0
Partial response	73	35.96	21	24.42	2	10	18	40	4	14.81	1	11.11	17	48.57	4	22.22	0	0	3	16.67	1	33.33	0	0	16	36.36	6	33.33	1	25	8	32	2	28.57	0	0	6	30	1	16.67	0	0	5	31.25	3	42.86	0
Stable disesae (demonstrated by a scan at = 3 months)	60	29.56	22	25.58	11	55	17	37.78	8	29.63	5	55.56	6	17.14	3	16.67	1	33.33	8	44.44	2	66.67	2	100	13	29.55	3	16.67	1	25	5	20	3	42.86	1	100	6	30	1	16.67	1	100	5	31.25	2	28.57	0
No response/progression of disease	55	27.09	38	44.19	6	30	9	20	14	51.85	2	22.22	11	31.43	11	61.11	2	66.67	5	27.78	0	0	0	0	11	25	8	44.44	2	50	8	32	1	14.29	0	0	6	30	2	33.33	0	0	5	31.25	2	28.57	0
Dont know	3	1.48	5	5.81	1	5	0	0	1	3.7	1	11.11	0	0	0	0	0	0	0	0	0	0	0	0	3	6.82	1	5.56	0	0	0	0	1	14.29	0	0	0	0	2	33.33	0	0	0	0	0	0	0
Reason for discontinuation of treatment regimen
Adverse event	7	3.45	1	1.16	0	0	3	6.67	1	3.7	0	0	0	0	0	0	0	0	0	0	0	0	0	0	3	6.82	0	0	0	0	1	4	0	0	0	0	0	0	0	0	0	0	0	0	0	0	0
Patient decision	12	5.91	7	8.14	3	15	3	6.67	1	3.7	2	22.22	1	2.86	0	0	0	0	0	0	0	0	0	0	2	4.55	4	22.22	1	25	3	12	2	28.57	0	0	3	15	0	0	0	0	0	0	0	0	0
Progressive disease	96	47.29	59	68.6	11	55	18	40	21	77.78	4	44.44	13	37.14	13	72.22	3	100	11	61.11	3	100	1	50	23	52.27	11	61.11	2	50	13	52	2	28.57	0	0	9	45	3	50	1	100	9	56.25	6	85.71	0
Completion of planned course of treatment	75	36.95	9	10.47	1	5	19	42.22	3	11.11	1	11.11	18	51.43	2	11.11	0	0	4	22.22	0	0	0	0	14	31.82	1	5.56	0	0	8	32	1	14.29	0	0	7	35	1	16.67	0	0	5	31.25	1	14.29	0
Death	16	7.88	0	0	1	5	2	4.44	0	0	0	0	1	2.86	0	0	0	0	4	22.22	0	0	1	50	2	4.55	0	0	0	0	3	12	0	0	0	0	1	5	0	0	0	0	3	18.75	0	0	0
Loss to follow-up	1	0.49	11	12.79	4	20	0	0	2	7.41	2	22.22	1	2.86	3	16.67	0	0	0	0	0	0	0	0	0	0	2	11.11	1	25	0	0	2	28.57	1	100	0	0	2	33.33	0	0	0	0	0	0	0
Other	3	1.48	1	1.16	0	0	1	2.22	0	0	0	0	1	2.86	0	0	0	0	0	0	0	0	0	0	0	0	1	5.56	0	0	0	0	0	0	0	0	1	5	0	0	0	0	0	0	0	0	0
Don't know	1	0.49	0	0	0	0	1	2.22	0	0	0	0	0	0	0	0	0	0	0	0	0	0	0	0	0	0	0	0	0	0	0	0	0	0	0	0	0	0	0	0	0	0	0	0	0	0	0
Time from discontinuation of previous line to initiation of second- or subsequent line of therapy, months
Mean (SD)			5.4	5.74	2.12	2.1			4.97	4.64	2.82	2.65			5.71	5.98	0.77	0.21			8.36	9.41	0.83	0.19			5.64	6.97	1.97	1.47			6.22	4.12	4.5				7.24	8.27	0.7				1.92	2.6
Median			3.35		1.02				3		1.27				3.73		0.83				5.83		0.83				3.52		1.6				3.5		4.5				3.37		0.7				0.97
IQR (Q1, Q3)			0.97	7.67	0.7	3.08			1.17	7.67	0.93	4.67			1	7.93	0.53	0.93			0.47	18.77	0.7	0.97			0.93	5.6	0.88	3.05			3	10.43	4.5	4.5			0.9	14.93	0.7	0.7			0.63	1.87
Min, Max			0	28.43	0.53	7.7			0.47	17.93	0.67	7.7			0	19.17	0.53	0.93			0.47	18.77	0.7	0.97			0.4	28.43	0.7	3.97			2.17	11.67	4.5	4.5			0.7	20.17	0.7	0.7			0.47	7.73
Total duration of therapy line, months
Mean (SD)	5.65	3.19	5.26	3.23	6.06	4.23	5.51	3.01	4.53	2.26	5.43	3.75	4.99	3.05	4.43	2.75	6.41	6.19	6.04	3.76	4.94	1.26	5.07	0.75	5.49	2.85	7.13	4.39	7.07	6.84	5.77	3.76	5.67	4.12			6.05	2.96	6.25	3.77	8.4		6.69	3.76	4.68	3.08
Median	5.13		4.9		4.45		5.13		3.5		4.2		4.5		4.2		4.37		4.88		5.5		5.07		5.12		6.32		3.7		5.67		6.13				5.25		6.3		8.4		5.27		3.97
IQR (Q1, Q3)	3.67	6.77	3.07	6.53	2.68	9.28	3.67	6.53	3.07	5.83	2.1	10.17	3.5	6.1	2.1	5.6	1.5	13.37	3.73	6.07	3.5	5.83	4.53	5.6	3.75	6.78	3.97	8.27	2.57	14.93	4.47	6.83	3.33	8.63			3.55	7.9	3.63	8.87	8.4	8.4	3.6	9.12	2.67	8.23
Min, Max	0.07	19.87	0	18.2	1.5	14.93	1.17	16.37	0.8	9.63	1.83	10.83	0.07	15.4	1.4	12.17	1.5	13.37	3.5	16.7	3.5	5.83	4.53	5.6	0.2	14.73	1.4	18.2	2.57	14.93	0.97	19.87	0	10.27			3	12.37	1.63	10.77	8.4	8.4	3.2	14.7	0.7	9.37
Time from initiation of line of therapy to disease progression, months
Mean (SD)	7.56	7.16	5.38	3.59	6.54	4.79	8.22	4.55	5.22	3.37	6.51	4.89	7.05	5.05	4.08	2.76	6.64	5.92	5.63	3.85	5	1.19	5.08	0.87	6.76	6.39	6.78	4.52	6.67	7.75	9.55	14.1	8.07	4.29			7.58	6.64	3.43	2.44	8.9		7.86	7.33	5.29	3.57
Median	6.1		4.4		4.42		8.17		4.43		3.5		5.88		3.6		4.37		5.02		5.6		5.08		5.67		5.83		2.57		5.77		10.1				4.55		3.12		8.9		6.3		4.17
IQR (Q1, Q3)	3.5	9.27	2.43	8.1	2.8	10.9	4.27	10.57	2.23	8.1	3.03	11.2	3.5	10.92	2.03	5.3	2.2	13.37	3.3	6.55	3.63	5.77	4.47	5.7	2.33	8.53	4	8.63	1.83	15.6	2.9	9.87	4.23	10.27			3.17	8.02	1.5	5.37	8.9	8.9	3.95	9.32	2.43	8.23
Min, Max	0.2	70.33	0.33	18.73	1.03	15.6	1.4	21.73	0.33	13.13	1.03	13.03	0.5	21.5	1	11.13	2.2	13.37	1.03	18	3.63	5.77	4.47	5.7	0.2	32.9	1.07	18.73	1.83	15.6	0.97	70.33	2.87	12.87			2.3	27.53	1.03	6.47	8.9	8.9	0.9	31.97	1.87	11.9
Total follow-up time among patients who died during the follow-up period, months (n,%)
n (%)	157	77.34	58	67.44	13	65	35	77.78	20	74.07	6	66.67	28	80	14	77.78	3	100	15	83.33	2	66.67	1	50	32	72.73	12	66.67	3	75	16	64	2	28.57	0	0	15	75	1	16.67	0	0	16	100	7	100	0
Mean (SD)	23.78	24.14	29.88	21.01	31.41	14.07	23.31	17.5	28.85	19.25	36.94	19.94	20.43	17.35	27.96	20.49	26.26	0.4	19.61	17.75	46.88	28.31	26.87		34.92	37.62	37.86	25.56	27.01	4.64	16.63	16.22	15.05	9.92			17.98	23.8	40				24.86	20.54	20.91	18.55
Median	16.77		22.1		26.67		18.97		22.28		33.73		18.1		21.07		26.23		11.13		46.88		26.87		21.38		27.03		24.87		13.85		15.05				8.93		40				15.63		15.13
IQR (Q1, Q3)	8.87	28.03	16.73	31.3	24.87	32.33	10.87	29.6	16.92	30.33	20	57.63	9.83	24.6	17.27	26.23	25.87	26.67	7.77	26.87	26.87	66.9	26.87	26.87	9.25	44.85	17.03	59.93	23.83	32.33	6.33	19.87	8.03	22.07			7.17	21.53	40	40			12.05	30.15	11.67	21.53
Min, Max	0	130.67	7.67	86.23	14	62.53	1.83	86.23	9.53	86.23	14	62.53	0	78.53	7.67	78.53	25.87	26.67	3.57	66.9	26.87	66.9	26.87	26.87	1.5	130.67	14.93	83.7	23.83	32.33	1.5	69.67	8.03	22.07			3.13	95.3	40	40			6.7	70.23	7.8	61.8
Total follow-up time among patients alive at the end of the follow-up period, months (n,%)
n (%)	35	17.24	23	26.74	7	35	6	13.33	5	18.52	3	33.33	6	17.14	3	16.67	0	0	3	16.67	1	33.33	1	50	8	18.18	5	27.78	1	25	7	28	4	57.14	1	100	5	25	5	83.33	1	100	0	0	0	0	0
Mean (SD)	39.89	28.23	33.55	11.81	28	7.35	23.66	8.31	26.69	7.53	28.79	8.88	33.76	6.98	32.89	1.44			39.38	13.92	23.6		23.6		55.66	46.62	37.91	16.04	38.2		44.33	22.75	38.62	16.54	25.9		35.4	9.31	35.4	9.31	21.97
Median	33.22		32.77		24.77		22.03		23.3		24.77		33.37		32.92				44.6		23.6		23.6		40.32		34.58		38.2		33.63		33.63		25.9		34.3		34.3		21.97
IQR (Q1, Q3)	23.3	44.6	24.18	37.02	22.63	38.2	19.87	24.77	21.43	35.83	22.63	38.97	31.17	34.57	31.82	33.97			23.6	49.93	23.6	23.6	23.6	23.6	22.67	89.05	29	55.07	38.2	38.2	31.23	67.57	31.23	34.77	25.9	25.9	33.07	40.87	33.07	40.87	21.97	21.97
Min, Max	5.13	132.53	16.33	67.57	21.97	38.97	10.03	38.97	19.87	38.97	22.63	38.97	23.3	46.93	31.17	34.57			23.6	49.93	23.6	23.6	23.6	23.6	5.13	132.53	16.33	57.9	38.2	38.2	20.3	82.43	25.9	67.57	25.9	25.9	21.97	46.8	21.97	46.8	21.97	21.97
Total follow-up time among ALL patients, months
Mean (SD)	27.43	25.95	31.08	18.53	30.22	12.03	23.39	15.84	28.29	16.88	34.22	16.88	23.1	16.64	29.06	18.05	26.26	0.4	22.9	18.44	39.12	24.11	25.23	2.31	40.57	40.79	37.88	22.33	29.81	6.76	26.6	22.83	31.89	18.19	25.9		22.33	22.26	36.17	8.54	21.97		24.86	20.54	20.91	18.55
Median	20		25.37		26.07		21.03		22.63		27.73		20.8		24.6		26.23		18.35		26.87		25.23		28.17		30.08		28.6		19.87		31.23		25.9		10.45		37.15		21.97		15.63		15.13
IQR (Q1, Q3)	9.77	33.07	18.8	34.77	23.72	35.27	13	29.37	18.8	31.3	22.63	39.73	10.5	29.07	18.93	32.47	25.87	26.67	8.4	33.97	23.6	66.9	23.6	26.87	10.35	55.12	18.07	55.07	24.35	35.27	8.03	32.2	22.07	34.77	25.9	25.9	7.47	33.68	33.07	40.87	21.97	21.97	12.05	30.15	11.67	21.53
Min, Max	0	132.53	7.67	86.23	14	62.53	1.83	86.23	9.53	86.23	14	62.53	0	78.53	7.67	78.53	25.87	26.67	3.57	66.9	23.6	66.9	23.6	26.87	1.5	132.53	14.93	83.7	23.83	38.2	1.5	82.43	8.03	67.57	25.9	25.9	3.13	95.3	21.97	46.8	21.97	21.97	6.7	70.23	7.8	61.8
Use of supportive/palliative medications during line of treatment
Pain control	103	50.74	53	61.63	15	75	18	40	17	62.96	5	55.56	19	54.29	13	72.22	3	100	10	55.56	1	33.33	2	100	15	34.09	6	33.33	3	75	14	56	4	57.14	1	100	14	70	6	100	1	100	13	81.25	6	85.71	0
Antiemetics	115	56.65	52	60.47	12	60	25	55.56	14	51.85	5	55.56	23	65.71	12	66.67	1	33.33	11	61.11	3	100	1	50	21	47.73	13	72.22	3	75	12	48	3	42.86	1	100	14	70	4	66.67	1	100	9	56.25	3	42.86	0
Antibiotics	42	20.69	18	20.93	5	25	6	13.33	5	18.52	1	11.11	11	31.43	6	33.33	1	33.33	6	33.33	1	33.33	1	50	8	18.18	3	16.67	1	25	6	24	1	14.29	0	0	3	15	1	16.67	1	100	2	12.5	1	14.29	0
Antifungals	4	1.97	2	2.33	3	15	0	0	0	0	0	0	1	2.86	1	5.56	1	33.33	1	5.56	1	33.33	0	0	0	0	0	0	1	25	1	4	0	0	0	0	0	0	0	0	1	100	1	6.25	0	0	0
Antivirals	1	0.49	3	3.49	0	0	0	0	2	7.41	0	0	0	0	1	5.56	0	0	1	5.56	0	0	0	0	0	0	0	0	0	0	0	0	0	0	0	0	0	0	0	0	0	0	0	0	0	0	0
Dexrazoxane	0	0	0	0	0	0	0	0	0	0	0	0	0	0	0	0	0	0	0	0	0	0	0	0	0	0	0	0	0	0	0	0	0	0	0	0	0	0	0	0	0	0	0	0	0	0	0
Transfusions	22	10.84	11	12.79	1	5	7	15.56	3	11.11	0	0	4	11.43	4	22.22	0	0	2	11.11	1	33.33	0	0	1	2.27	2	11.11	1	25	2	8	1	14.29	0	0	5	25	0	0	0	0	1	6.25	0	0	0
Antianxiety, antidepressant drugs	30	14.78	14	16.28	6	30	8	17.78	6	22.22	3	33.33	6	17.14	4	22.22	1	33.33	4	22.22	1	33.33	0	0	4	9.09	2	11.11	1	25	3	12	0	0	1	100	4	20	1	16.67	0	0	1	6.25	0	0	0
Growth factors	39	19.21	16	18.6	4	20	13	28.89	5	18.52	1	11.11	9	25.71	5	27.78	1	33.33	4	22.22	1	33.33	0	0	4	9.09	3	16.67	1	25	3	12	1	14.29	1	100	4	20	1	16.67	0	0	2	12.5	0	0	0
Bisphosphonates	4	1.97	2	2.33	1	5	1	2.22	1	3.7	0	0	0	0	0	0	0	0	1	5.56	0	0	0	0	1	2.27	1	5.56	1	25	0	0	0	0	0	0	1	5	0	0	0	0	0	0	0	0	0
Referral to psychiatrist, psychologist, or other professional for distress management	14	6.9	10	11.63	5	25	3	6.67	3	11.11	4	44.44	3	8.57	3	16.67	0	0	2	11.11	1	33.33	1	50	2	4.55	2	11.11	0	0	4	16	0	0	0	0	0	0	0	0	0	0	0	0	1	14.29	0
Oxygen	13	6.4	10	11.63	2	10	1	2.22	3	11.11	0	0	2	5.71	4	22.22	1	33.33	1	5.56	1	33.33	1	50	1	2.27	0	0	0	0	6	24	1	14.29	0	0	2	10	1	16.67	0	0	0	0	0	0	0
Radiation therapy, excluding utilization for pain control	10	4.93	5	5.81	0	0	2	4.44	1	3.7	0	0	1	2.86	2	11.11	0	0	3	16.67	0	0	0	0	0	0	1	5.56	0	0	2	8	1	14.29	0	0	2	10	0	0	0	0	0	0	0	0	0
Nutritional support	41	20.2	17	19.77	1	5	9	20	5	18.52	1	11.11	8	22.86	7	38.89	0	0	4	22.22	0	0	0	0	8	18.18	4	22.22	0	0	5	20	0	0	0	0	4	20	1	16.67	0	0	3	18.75	0	0	0
Corticosteroids, except for utilization for pain control	42	20.69	33	38.37	10	50	13	28.89	12	44.44	5	55.56	12	34.29	9	50	2	66.67	3	16.67	2	66.67	1	50	5	11.36	4	22.22	1	25	3	12	3	42.86	0	0	5	25	2	33.33	1	100	1	6.25	1	14.29	0
Patient did not receive any supportive care	13	6.4	3	3.49	0	0	3	6.67	0	0	0	0	3	8.57	1	5.56	0	0	1	5.56	0	0	0	0	2	4.55	2	11.11	0	0	3	12	0	0	0	0	0	0	0	0	0	0	1	6.25	0	0	0
Others	0	0	0	0	1	5	0	0	0	0	0	0	0	0	0	0	1	33.33	0	0	0	0	0	0	0	0	0	0	0	0	0	0	0	0	0	0	0	0	0	0	0	0	0	0	0	0	0
Don’t know	17	8.37	0	0	0	0	2	4.44	0	0	0	0	0	0	0	0	0	0	1	5.56	0	0	0	0	9	20.45	0	0	0	0	4	16	0	0	0	0	1	5	0	0	0	0	0	0	0	0	0
Treatment for pain control among those who received supportive/palliative care during line of treatment
Opiate analgesics	84	81.55	44	83.02	12	80	16	88.89	15	88.24	5	100	15	78.95	10	76.92	2	66.67	7	70	1	100	2	100	13	86.67	4	66.67	2	66.67	11	78.57	2	50	0	0	13	92.86	6	100	1	100	9	69.23	6	100	0
Other analgesics	56	54.37	29	54.72	10	66.67	9	50	10	58.82	2	40	11	57.89	8	61.54	2	66.67	5	50	1	100	2	100	8	53.33	4	66.67	2	66.67	9	64.29	2	50	1	100	9	64.29	3	50	1	100	5	38.46	1	16.67	0
Radiotherapy	16	15.53	12	22.64	2	13.33	3	16.67	6	35.29	1	20	2	10.53	3	23.08	0	0	2	20	0	0	1	50	2	13.33	0	0	0	0	2	14.29	1	25	0	0	3	21.43	1	16.67	0	0	2	15.38	1	16.67	0
Psychological intervention	9	8.74	3	5.66	1	6.67	0	0	2	11.76	1	20	2	10.53	1	7.69	0	0	1	10	0	0	0	0	1	6.67	0	0	0	0	1	7.14	0	0	0	0	2	14.29	0	0	0	0	2	15.38	0	0	0
Sedation for refractory pain	7	6.8	4	7.55	1	6.67	2	11.11	0	0	0	0	0	0	3	23.08	0	0	1	10	0	0	1	50	0	0	0	0	0	0	1	7.14	0	0	0	0	2	14.29	0	0	0	0	1	7.69	1	16.67	0
Epidural infusions	1	0.97	2	3.77	0	0	0	0	1	5.88	0	0	1	5.26	1	7.69	0	0	0	0	0	0	0	0	0	0	0	0	0	0	0	0	0	0	0	0	0	0	0	0	0	0	0	0	0	0	0
Splanchnic nerve block	0	0	0	0	0	0	0	0	0	0	0	0	0	0	0	0	0	0	0	0	0	0	0	0	0	0	0	0	0	0	0	0	0	0	0	0	0	0	0	0	0	0	0	0	0	0	0
Other treatment	0	0	0	0	0	0	0	0	0	0	0	0	0	0	0	0	0	0	0	0	0	0	0	0	0	0	0	0	0	0	0	0	0	0	0	0	0	0	0	0	0	0	0	0	0	0	0
Don’t know	0	0	0	0	0	0	0	0	0	0	0	0	0	0	0	0	0	0	0	0	0	0	0	0	0	0	0	0	0	0	0	0	0	0	0	0	0	0	0	0	0	0	0	0	0	0	0
Type of transfusions among those who received supportive/palliative care during line of treatment
Red blood cell transfusion	22	100	11	100	1	100	7	100	3	100	0		4	100	4	100	0		2	100	1	100	0		1	100	2	100	1	100	2	100	1	100	0		5	100	0		0		1	100	0		0
Platelet transfusion	2	9.09	0	0	0	0	2	28.57	0	0	0		0	0	0	0	0		0	0	0	0	0		0	0	0	0	0	0	0	0	0	0	0		0	0	0		0		0	0	0		0
Other transfusion typesl to be added based upon actual data	0	0	0	0	0	0	0	0	0	0	0		0	0	0	0	0		0	0	0	0	0		0	0	0	0	0	0	0	0	0	0	0		0	0	0		0		0	0	0		0
Don’t know	0	0	0	0	0	0	0	0	0	0	0		0	0	0	0	0		0	0	0	0	0		0	0	0	0	0	0	0	0	0	0	0		0	0	0		0		0	0	0		0
Diagnostic tests as part of supportive care during line of treatment
Computed tomography (CT) scan	166	81.77	73	84.88	19	95	40	88.89	25	92.59	8	88.89	31	88.57	16	88.89	3	100	15	83.33	3	100	2	100	36	81.82	15	83.33	4	100	15	60	3	42.86	1	100	17	85	6	100	1	100	12	75	5	71.43	0
Positron emission tomography (PET) scan (whole body)	34	16.75	11	12.79	2	10	4	8.89	0	0	1	11.11	5	14.29	2	11.11	0	0	4	22.22	1	33.33	1	50	6	13.64	2	11.11	0	0	5	20	3	42.86	0	0	2	10	1	16.67	0	0	8	50	2	28.57	0
GI endoscope	3	1.48	0	0	0	0	1	2.22	0	0	0	0	2	5.71	0	0	0	0	0	0	0	0	0	0	0	0	0	0	0	0	0	0	0	0	0	0	0	0	0	0	0	0	0	0	0	0	0
Magnetic Resonance Imaging (MRI)	32	15.76	9	10.47	1	5	5	11.11	2	7.41	0	0	6	17.14	2	11.11	0	0	2	11.11	1	33.33	1	50	7	15.91	2	11.11	0	0	4	16	0	0	0	0	4	20	1	16.67	0	0	4	25	1	14.29	0
Multi Gated Acquisition Scan (MUGA)	17	8.37	3	3.49	1	5	4	8.89	1	3.7	0	0	3	8.57	1	5.56	1	33.33	2	11.11	0	0	0	0	2	4.55	0	0	0	0	2	8	0	0	0	0	2	10	0	0	0	0	2	12.5	1	14.29	0
No diagnostic tests performed as part of their supportive care during this period	15	7.39	5	5.81	1	5	3	6.67	2	7.41	1	11.11	2	5.71	1	5.56	0	0	1	5.56	0	0	0	0	3	6.82	0	0	0	0	5	20	2	28.57	0	0	1	5	0	0	0	0	0	0	0	0	0
Don’t know	4	1.97	0	0	0	0	1	2.22	0	0	0	0	0	0	0	0	0	0	0	0	0	0	0	0	0	0	0	0	0	0	3	12	0	0	0	0	0	0	0	0	0	0	0	0	0	0	0

## Sheet: Tx (Germany)
Table B-9. Treatment Characteristics of Advanced Soft Tissue Sarcoma by Line of Therapy: Germany
	Total						Leiomyosarcomas						Others / NOS						Fibroblastic/Myofibroblastic						Liposarcomas						Vascular sarcomas						Rhabdomyosarcomas						Synovial sarcoma
Characteristic	First line		Second line		Third line		First line		Second line		Third line		First line		Second line		Third line		First line		Second line		Third line		First line		Second line		Third line		First line		Second line		Third line		First line		Second line		Third line		First line		Second line		Third line
	N	%	N	%	N	%	N	%	N	%	N	%	N	%	N	%	N	%	N	%	N	%	N	%	N	%	N	%	N	%	N	%	N	%	N	%	N	%	N	%	N	%	N	%	N	%	N	%
Patients receiving nth-line therapy	204	100	82	100	12	100	66	100	31	100	6	100	43	100	14	100	2	100	20	100	10	100	3	100	22	100	6	100	0		17	100	5	100	0		21	100	11	100	0		15	100	5	100	1	100
Weight in Kg at start of therapy line (Known weight)	180	100	75	100	11	100	54	100	27	100	5	100	40	100	12	100	2	100	19	100	10	100	3	100	19	100	6	100	0		14	100	4	100	0		20	100	11	100	0		14	100	5	100	1	100
Mean (SD)	71.9	9.14	70.19	9.08	67.82	9.88	70.48	9.46	70.52	10.09	67.6	11.87	73.75	9.69	70.08	10.4	66.5	9.19	71.11	8.61	69.3	6.9	68.67	12.66	73	8.57	69.67	7.37	---	---	71.5	10.07	73.5	12.87	---	---	70.9	7.53	69.18	9.14	---	---	73.5	9.43	70.6	6.5	69
Median	71		70		68		71		70		68		72		69.5		66.5		70		68		64		71		69		---		71		72.5		---		71		70		---		75		70		69
IQR (Q1, Q3)	65.5	78	63	78	60	78	63	78	63	80	60	78	67.5	80.5	60	78.5	60	73	66	73	65	72	59	83	67	80	65	77	---	---	63	78	64.5	82.5	---	---	69	76.5	64	75	---	---	65	81	69	75	69	69
(min, max)	52	102	50	90	52	83	52	90	52	88	52	80	56	102	58	88	60	73	58	92	61	85	59	83	60	92	60	78	---	---	57	90	59	90	---	---	52	82	50	82	---	---	59	88	61	78	69	69
Body surface area at start of therapy line (Known BSA)	174	100	72	100	11	100	51	100	25	100	5	100	39	100	12	100	2	100	18	100	9	100	3	100	19	100	6	100	0		14	100	4	100	0		20	100	11	100	0		13	100	5	100	1	100
Mean (SD)	1.86	0.15	1.83	0.16	1.8	0.17	1.83	0.17	1.83	0.19	1.81	0.22	1.89	0.15	1.82	0.18	1.77	0.11	1.84	0.14	1.81	0.12	1.82	0.19	1.88	0.13	1.84	0.11	---	---	1.84	0.16	1.86	0.2	---	---	1.85	0.13	1.82	0.16	---	---	1.9	0.15	1.85	0.11	1.82
Median	1.85		1.85		1.82		1.83		1.87		1.84		1.87		1.84		1.77		1.82		1.79		1.73		1.86		1.86		---		1.83		1.84		---		1.87		1.87		---		1.92		1.83		1.82
IQR (Q1, Q3)	1.74	1.97	1.71	1.95	1.68	1.96	1.68	1.97	1.67	1.97	1.65	1.96	1.76	2	1.62	1.96	1.69	1.85	1.74	1.91	1.71	1.87	1.68	2.04	1.78	1.97	1.74	1.93	---	---	1.71	1.96	1.74	1.99	---	---	1.83	1.94	1.73	1.93	---	---	1.82	2.01	1.82	1.93	1.82	1.82
(min, max)	1.47	2.26	1.44	2.16	1.51	2.05	1.48	2.18	1.48	2.16	1.51	2.05	1.57	2.26	1.6	2.08	1.69	1.85	1.64	2.15	1.7	2.07	1.68	2.04	1.7	2.15	1.7	1.96	---	---	1.59	2.13	1.64	2.13	---	---	1.47	2.01	1.44	2.01	---	---	1.66	2.08	1.69	1.99	1.82	1.82
Performance Status at start of therapy line
Performance Status measured on the ECOG scale
Mean (SD)	1.09	0.52	1.11	0.39	1.17	0.39	1.11	0.53	1.13	0.43	1	0	1.16	0.53	1.07	0.27	1.5	0.71	0.85	0.59	0.9	0.32	1.33	0.58	1.18	0.5	1.33	0.52	---	---	1.18	0.39	1	0	---	---	1.05	0.5	1.27	0.47	---	---	1	0.53	1	0	1
Median	1		1		1		1		1		1		1		1		1.5		1		1		1		1		1		---		1		1		---		1		1		---		1		1		1
IQR (Q1, Q3)	1	1	1	1	1	1	1	1	1	1	1	1	1	1	1	1	1	2	0.5	1	1	1	1	2	1	1	1	2	---	---	1	1	1	1	---	---	1	1	1	2	---	---	1	1	1	1	1	1
(min, max)	0	2	0	2	1	2	0	2	0	2	1	1	0	2	1	2	1	2	0	2	0	1	1	2	0	2	1	2	---	---	1	2	1	1	---	---	0	2	1	2	---	---	0	2	1	1	1	1
Distribution
0=Fully active, able to carry on all pre-disease performance without restriction	19	9.31	2	2.44	0	0	6	9.09	1	3.23	0	0	3	6.98	0	0	0	0	5	25	1	10	0	0	1	4.55	0	0	0	0	0	0	0	0	0		2	9.52	0	0	0		2	13.33	0	0	0	0
1=Restricted in physically strenuous activity but ambulatory	147	72.06	69	84.15	10	83.33	47	71.21	25	80.65	6	100	30	69.77	13	92.86	1	50	13	65	9	90	2	66.67	16	72.73	4	66.67	0	0	14	82.35	5	100	0		16	76.19	8	72.73	0		11	73.33	5	100	1	100
2=Ambulatory and capable of all self-care but unable to carry out any work	38	18.63	11	13.41	2	16.67	13	19.7	5	16.13	0	0	10	23.26	1	7.14	1	50	2	10	0	0	1	33.33	5	22.73	2	33.33	0	0	3	17.65	0	0	0		3	14.29	3	27.27	0		2	13.33	0	0	0	0
3=Capable of only limited self-care, confined to bed or chair more than 50% of waking hours	0	0	0	0	0	0	0	0	0	0	0	0	0	0	0	0	0	0	0	0	0	0	0	0	0	0	0	0	0	0	0	0	0	0	0		0	0	0	0	0		0	0	0	0	0	0
4=Completely disabled. Cannot carry on any self-care. Totally confined to bed or chair	0	0	0	0	0	0	0	0	0	0	0	0	0	0	0	0	0	0	0	0	0	0	0	0	0	0	0	0	0	0	0	0	0	0	0		0	0	0	0	0		0	0	0	0	0	0
Don't know	0	0	0	0	0	0	0	0	0	0	0	0	0	0	0	0	0	0	0	0	0	0	0	0	0	0	0	0	0	0	0	0	0	0	0		1	4.76	1	9.09	0		0	0	0	0	0	0
Use of cancer-directed treatments during therapy line
Overall
Chemotherapy	201	98.5294	67	81.7073	11	91.6667	64	96.9697	22	70.9677	5	83.3333	42	97.6744	14	100	2	100	20	100	7	70	3	100	22	100	5	83.3333	0	0	17	100	5	100	0	0	21	100	10	90.9091	0	0	15	100	4	80	1	100
Biologic therapy	0	0	0	0	0	0	0	0	0	0	0	0	0	0	0	0	0	0	0	0	0	0	0	0	0	0	0	0	0	0	0	0	0	0	0	0	0	0	0	0	0	0	0	0	0	0	0	0
Targeted therapy	3	1.47059	15	18.2927	1	8.33333	2	3.0303	9	29.0323	1	16.6667	1	2.32558	0	0	0	0	0	0	3	30	0	0	0	0	1	16.6667	0	0	0	0	0	0	0	0	0	0	1	9.09091	0	0	0	0	1	20	0	0
Single class of agents
Chemotherapy only	201	98.5294	67	81.7073	11	91.6667	64	96.9697	22	70.9677	5	83.3333	42	97.6744	14	100	2	100	20	100	7	70	3	100	22	100	5	83.3333	0	0	17	100	5	100	0	0	21	100	10	90.9091	0	0	15	100	4	80	1	100
Biologic therapy only	0	0	0	0	0	0	0	0	0	0	0	0	0	0	0	0	0	0	0	0	0	0	0	0	0	0	0	0	0	0	0	0	0	0	0	0	0	0	0	0	0	0	0	0	0	0	0	0
Targeted therapy only	3	1.47059	15	18.2927	1	8.33333	2	3.0303	9	29.0323	1	16.6667	1	2.32558	0	0	0	0	0	0	3	30	0	0	0	0	1	16.6667	0	0	0	0	0	0	0	0	0	0	1	9.09091	0	0	0	0	1	20	0	0
Combination of classes of agents		0
Chemotherapy + biologic therapyb	0	0	0	0	0	0	0	0	0	0	0	0	0	0	0	0	0	0	0	0	0	0	0	0	0	0	0	0	0	0	0	0	0	0	0	0	0	0	0	0	0	0	0	0	0	0	0	0
Chemotherapy + targeted therapyc	0	0	0	0	0	0	0	0	0	0	0	0	0	0	0	0	0	0	0	0	0	0	0	0	0	0	0	0	0	0	0	0	0	0	0	0	0	0	0	0	0	0	0	0	0	0	0	0
Biologic therapyb + targeted therapyc	0	0	0	0	0	0	0	0	0	0	0	0	0	0	0	0	0	0	0	0	0	0	0	0	0	0	0	0	0	0	0	0	0	0	0	0	0	0	0	0	0	0	0	0	0	0	0	0
Chemotherapy + biologic therapyb + targeted therapyc	0	0	0	0	0	0	0	0	0	0	0	0	0	0	0	0	0	0	0	0	0	0	0	0	0	0	0	0	0	0	0	0	0	0	0	0	0	0	0	0	0	0	0	0	0	0	0	0
Use of selected chemotherapies during therapy line
Bevacizumab	0	0	0	0	0	0	0	0	0	0	0	0	0	0	0	0	0	0	0	0	0	0	0	0	0	0	0	0	0	0	0	0	0	0	0	0	0	0	0	0	0	0	0	0	0	0	0	0
Carboplatin	3	1.47	0	0	0	0	0	0	0	0	0	0	0	0	0	0	0	0	0	0	0	0	0	0	0	0	0	0	0	0	3	17.65	0	0	0	0	0	0	0	0	0	0	0	0	0	0	0	0
Cisplatin	4	1.96	0	0	0	0	0	0	0	0	0	0	1	2.33	0	0	0	0	0	0	0	0	0	0	1	4.55	0	0	0	0	2	11.76	0	0	0	0	0	0	0	0	0	0	0	0	0	0	0	0
Crizotinib	0	0	3	3.66	0	0	0	0	3	9.68	0	0	0	0	0	0	0	0	0	0	0	0	0	0	0	0	0	0	0	0	0	0	0	0	0	0	0	0	0	0	0	0	0	0	0	0	0	0
Cyclophosphamide	0	0	0	0	0	0	0	0	0	0	0	0	0	0	0	0	0	0	0	0	0	0	0	0	0	0	0	0	0	0	0	0	0	0	0	0	0	0	0	0	0	0	0	0	0	0	0	0
Dacarbazine	8	3.92	1	1.22	1	8.33	2	3.03	0	0	1	16.67	1	2.33	0	0	0	0	4	20	0	0	0	0	0	0	1	16.67	0	0	0	0	0	0	0	0	1	4.76	0	0	0	0	0	0	0	0	0	0
Dactinomycin	0	0	0	0	0	0	0	0	0	0	0	0	0	0	0	0	0	0	0	0	0	0	0	0	0	0	0	0	0	0	0	0	0	0	0	0	0	0	0	0	0	0	0	0	0	0	0	0
Docetaxel	30	14.71	16	19.51	0	0	15	22.73	7	22.58	0	0	7	16.28	7	50	0	0	1	5	2	20	0	0	2	9.09	0	0	0	0	2	11.76	0	0	0	0	1	4.76	0	0	0	0	2	13.33	0	0	0	0
Doxorubicin	143	70.1	9	10.98	0	0	44	66.67	4	12.9	0	0	34	79.07	1	7.14	0	0	11	55	0	0	0	0	20	90.91	0	0	0	0	3	17.65	4	80	0	0	19	90.48	0	0	0	0	12	80	0	0	0	0
Epirubicin	4	1.96	0	0	0	0	3	4.55	0	0	0	0	0	0	0	0	0	0	1	5	0	0	0	0	0	0	0	0	0	0	0	0	0	0	0	0	0	0	0	0	0	0	0	0	0	0	0	0
Etoposide	0	0	0	0	0	0	0	0	0	0	0	0	0	0	0	0	0	0	0	0	0	0	0	0	0	0	0	0	0	0	0	0	0	0	0	0	0	0	0	0	0	0	0	0	0	0	0	0
Everolimus	0	0	0	0	0	0	0	0	0	0	0	0	0	0	0	0	0	0	0	0	0	0	0	0	0	0	0	0	0	0	0	0	0	0	0	0	0	0	0	0	0	0	0	0	0	0	0	0
Gemcitabine	29	14.22	18	21.95	1	8.33	16	24.24	7	22.58	0	0	6	13.95	9	64.29	0	0	1	5	2	20	0	0	1	4.55	0	0	0	0	2	11.76	0	0	0	0	1	4.76	0	0	0	0	2	13.33	0	0	1	100
Ifosfamide	43	21.08	36	43.9	0	0	9	13.64	12	38.71	0	0	14	32.56	3	21.43	0	0	9	45	5	50	0	0	2	9.09	4	66.67	0	0	0	0	1	20	0	0	5	23.81	8	72.73	0	0	4	26.67	3	60	0	0
Imatinib	0	0	0	0	0	0	0	0	0	0	0	0	0	0	0	0	0	0	0	0	0	0	0	0	0	0	0	0	0	0	0	0	0	0	0	0	0	0	0	0	0	0	0	0	0	0	0	0
Interferon	0	0	0	0	0	0	0	0	0	0	0	0	0	0	0	0	0	0	0	0	0	0	0	0	0	0	0	0	0	0	0	0	0	0	0	0	0	0	0	0	0	0	0	0	0	0	0	0
Melphalan	0	0	0	0	0	0	0	0	0	0	0	0	0	0	0	0	0	0	0	0	0	0	0	0	0	0	0	0	0	0	0	0	0	0	0	0	0	0	0	0	0	0	0	0	0	0	0	0
Methotrexate	0	0	0	0	0	0	0	0	0	0	0	0	0	0	0	0	0	0	0	0	0	0	0	0	0	0	0	0	0	0	0	0	0	0	0	0	0	0	0	0	0	0	0	0	0	0	0	0
Paclitaxel	12	5.88	1	1.22	1	8.33	0	0	0	0	0	0	0	0	1	7.14	0	0	0	0	0	0	0	0	0	0	0	0	0	0	11	64.71	0	0	0	0	0	0	0	0	0	0	1	6.67	0	0	1	100
Pazopanib	3	1.47	12	14.63	1	8.33	2	3.03	6	19.35	1	16.67	1	2.33	0	0	0	0	0	0	3	30	0	0	0	0	1	16.67	0	0	0	0	0	0	0	0	0	0	1	9.09	0	0	0	0	1	20	0	0
Sirolimus	0	0	0	0	0	0	0	0	0	0	0	0	0	0	0	0	0	0	0	0	0	0	0	0	0	0	0	0	0	0	0	0	0	0	0	0	0	0	0	0	0	0	0	0	0	0	0	0
Sorafenib	0	0	0	0	0	0	0	0	0	0	0	0	0	0	0	0	0	0	0	0	0	0	0	0	0	0	0	0	0	0	0	0	0	0	0	0	0	0	0	0	0	0	0	0	0	0	0	0
Sulindac	0	0	0	0	0	0	0	0	0	0	0	0	0	0	0	0	0	0	0	0	0	0	0	0	0	0	0	0	0	0	0	0	0	0	0	0	0	0	0	0	0	0	0	0	0	0	0	0
Sunitinib	0	0	0	0	0	0	0	0	0	0	0	0	0	0	0	0	0	0	0	0	0	0	0	0	0	0	0	0	0	0	0	0	0	0	0	0	0	0	0	0	0	0	0	0	0	0	0	0
Tamoxifen	0	0	0	0	0	0	0	0	0	0	0	0	0	0	0	0	0	0	0	0	0	0	0	0	0	0	0	0	0	0	0	0	0	0	0	0	0	0	0	0	0	0	0	0	0	0	0	0
Temozolomide	0	0	0	0	0	0	0	0	0	0	0	0	0	0	0	0	0	0	0	0	0	0	0	0	0	0	0	0	0	0	0	0	0	0	0	0	0	0	0	0	0	0	0	0	0	0	0	0
TNF-alpha	0	0	0	0	0	0	0	0	0	0	0	0	0	0	0	0	0	0	0	0	0	0	0	0	0	0	0	0	0	0	0	0	0	0	0	0	0	0	0	0	0	0	0	0	0	0	0	0
Topotecan	0	0	1	1.22	0	0	0	0	0	0	0	0	0	0	1	7.14	0	0	0	0	0	0	0	0	0	0	0	0	0	0	0	0	0	0	0	0	0	0	0	0	0	0	0	0	0	0	0	0
Toremifene	0	0	0	0	0	0	0	0	0	0	0	0	0	0	0	0	0	0	0	0	0	0	0	0	0	0	0	0	0	0	0	0	0	0	0	0	0	0	0	0	0	0	0	0	0	0	0	0
Trabectedin	1	0.49	4	4.88	9	75	0	0	1	3.23	4	66.67	1	2.33	0	0	2	100	0	0	0	0	3	100	0	0	0	0	0	0	0	0	0	0	0	0	0	0	2	18.18	0	0	0	0	1	20	0	0
Vinblastine	0	0	0	0	0	0	0	0	0	0	0	0	0	0	0	0	0	0	0	0	0	0	0	0	0	0	0	0	0	0	0	0	0	0	0	0	0	0	0	0	0	0	0	0	0	0	0	0
Vincristine	0	0	0	0	0	0	0	0	0	0	0	0	0	0	0	0	0	0	0	0	0	0	0	0	0	0	0	0	0	0	0	0	0	0	0	0	0	0	0	0	0	0	0	0	0	0	0	0
Vinorelbine	0	0	0	0	1	8.33	0	0	0	0	1	16.67	0	0	0	0	0	0	0	0	0	0	0	0	0	0	0	0	0	0	0	0	0	0	0	0	0	0	0	0	0	0	0	0	0	0	0	0
Pegylated Liposomal Doxorubicin	0	0	0	0	0	0	0	0	0	0	0	0	0	0	0	0	0	0	0	0	0	0	0	0	0	0	0	0	0	0	0	0	0	0	0	0	0	0	0	0	0	0	0	0	0	0	0	0
Bleomycin	0	0	0	0	0	0	0	0	0	0	0	0	0	0	0	0	0	0	0	0	0	0	0	0	0	0	0	0	0	0	0	0	0	0	0	0	0	0	0	0	0	0	0	0	0	0	0	0
Following current ESMO treatment guidelines during first-line
Number of cycles during therapy lined (Known number of cycles)	204	100	79	100	12	100	66	100	28	100	6	100	43	100	14	100	2	100	20	100	10	100	3	100	22	100	6	100	0	100	17	100	5	100	0	100	21	100	11	100	0	100	15	100	5	100	1	100
Mean (SD)	5.22	1.88	5.97	3.35	4.67	3.8	5.38	2.33	6.25	3.67	5.33	5.2	5.07	2.03	5.14	1.51	3.5	3.54	5.6	0.99	7.3	3.5	3.67	0.58	5.14	1.49	4.83	1.6	---	---	5.12	1.36	5	1	---	---	5.1	1.41	5.27	3.2	---	---	4.8	1.86	8	6.78	6
Median	6		6		4		6		6		4		6		6		3.5		6		6		4		6		5.5		---	---	6		5		---	---	6		6		---	---	6		6		6
IQR (Q1, Q3)	4	6	4	6	2	6	4	6	5	6.5	2	6	3	6	4	6	1	6	6	6	6	11	3	4	4	6	4	6	---	---	4	6	4	6	---	---	4	6	3	6	---	---	3	6	4	6	6	6
(min, max)	1	16	1	20	1	15	1	16	1	18	1	15	2	13	2	6	1	6	2	6	3	14	3	4	2	6	2	6	---	---	2	6	4	6	---	---	2	6	1	13	---	---	1	6	4	20	6	6
Distribution
1	4	1.96	3	3.8	2	16.67	3	4.55	2	7.14	1	16.67	0	0	0	0	1	50	0	0	0	0	0	0	0	0	0	0	0	0	0	0	0	0	0	0	0	0	1	9.09	0	0	1	6.67	0	0	0	0
2	16	7.84	7	8.86	2	16.67	2	3.03	3	10.71	2	33.33	6	13.95	2	14.29	0	0	1	5	0	0	0	0	2	9.09	1	16.67	0	0	1	5.88	0	0	0	0	2	9.52	1	9.09	0	0	2	13.33	0	0	0	0
3	18	8.82	4	5.06	1	8.33	6	9.09	1	3.57	0	0	5	11.63	0	0	0	0	0	0	1	10	1	33.33	3	13.64	0	0	0	0	2	11.76	0	0	0	0	1	4.76	2	18.18	0	0	1	6.67	0	0	0	0
4	20	9.8	8	10.13	2	16.67	8	12.12	0	0	0	0	3	6.98	2	14.29	0	0	1	5	1	10	2	66.67	1	4.55	1	16.67	0	0	2	11.76	2	40	0	0	4	19.05	0	0	0	0	1	6.67	2	40	0	0
5	10	4.9	5	6.33	0	0	3	4.55	3	10.71	0	0	4	9.3	0	0	0	0	2	10	0	0	0	0	0	0	1	16.67	0	0	1	5.88	1	20	0	0	0	0	0	0	0	0	0	0	0	0	0	0
6	132	64.71	40	50.63	4	33.33	42	63.64	12	42.86	2	33.33	23	53.49	10	71.43	1	50	16	80	5	50	0	0	16	72.73	3	50	0	0	11	64.71	2	40	0	0	14	66.67	6	54.55	0	0	10	66.67	2	40	1	100
7+	4	1.96	12	15.19	1	8.33	2	3.03	7	25	1	16.67	2	4.65	0	0	0	0	0	0	3	30	0	0	0	0	0	0	0	0	0	0	0	0	0	0	0	0	1	9.09	0	0	0	0	1	20	0	0
Best response according to RECIST
Complete response	5	2.45	0	0	0	0	3	4.55	0	0	0	0	0	0	0	0	0	0	0	0	0	0	0	0	0	0	0	0	0	0	1	5.88	0	0	0	0	1	4.76	0	0	0	0	0	0	0	0	0	0
Partial response	75	36.76	44	53.66	2	16.67	28	42.42	20	64.52	1	16.67	13	30.23	7	50	0	0	6	30	7	70	1	33.33	11	50	3	50	0	0	3	17.65	2	40	0	0	11	52.38	4	36.36	0	0	3	20	1	20	0	0
Stable disesae (demonstrated by a scan at = 3 months)	72	35.29	23	28.05	5	41.67	19	28.79	6	19.35	3	50	18	41.86	4	28.57	1	50	11	55	2	20	1	33.33	5	22.73	1	16.67	0	0	7	41.18	2	40	0	0	5	23.81	4	36.36	0	0	7	46.67	4	80	0	0
No response/progression of disease	52	25.49	15	18.29	4	33.33	16	24.24	5	16.13	1	16.67	12	27.91	3	21.43	1	50	3	15	1	10	1	33.33	6	27.27	2	33.33	0	0	6	35.29	1	20	0	0	4	19.05	3	27.27	0	0	5	33.33	0	0	1	100
Don't know	0	0	0	0	1	8.33	0	0	0	0	1	16.67	0	0	0	0	0	0	0	0	0	0	0	0	0	0	0	0	0	0	0	0	0	0	0	0	0	0	0	0	0	0	0	0	0	0	0	0
Reason for discontinuation of treatment regimen
Adverse event	3	1.47	4	4.88	1	8.33	0	0	2	6.45	0	0	2	4.65	1	7.14	0	0	1	5	1	10	1	33.33	0	0	0	0	0	0	0	0	0	0	0	0	0	0	0	0	0	0	0	0	0	0	0	0
Patient decision	12	5.88	4	4.88	0	0	6	9.09	3	9.68	0	0	5	11.63	0	0	0	0	0	0	1	10	0	0	0	0	0	0	0	0	0	0	0	0	0	0	1	4.76	0	0	0	0	0	0	0	0	0	0
Progressive disease	54	26.47	15	18.29	5	41.67	17	25.76	6	19.35	2	33.33	12	27.91	1	7.14	1	50	4	20	1	10	1	33.33	6	27.27	2	33.33	0	0	6	35.29	1	20	0	0	4	19.05	3	27.27	0	0	5	33.33	1	20	1	100
Completion of planned course of treatment	136	66.67	43	52.44	3	25	43	65.15	12	38.71	2	33.33	25	58.14	11	78.57	0	0	15	75	5	50	0	0	16	72.73	3	50	0	0	11	64.71	2	40	0	0	16	76.19	6	54.55	0	0	10	66.67	4	80	1	100
Death	0	0	0	0	0	0	0	0	0	0	0	0	0	0	0	0	0	0	0	0	0	0	0	0	0	0	0	0	0	0	0	0	0	0	0	0	0	0	0	0	0	0	0	0	0	0	0	0
Loss to follow-up	0	0	16	19.51	4	33.33	0	0	9	29.03	2	33.33	0	0	0	0	1	50	0	0	2	20	1	33.33	0	0	1	16.67	0	0	0	0	2	40	0	0	0	0	2	18.18	0	0	0	0	0	0	0	0
Other	1	0.49	1	1.22	0	0	0	0	0	0	0	0	1	2.33	1	7.14	0	0	0	0	0	0	0	0	0	0	0	0	0	0	0	0	0	0	0	0	0	0	0	0	0	0	0	0	0	0	0	0
Don't know	0	0	0	0	0	0	0	0	0	0	0	0	0	0	0	0	0	0	0	0	0	0	0	0	0	0	0	0	0	0	0	0	0	0	0	0	0	0	0	0	0	0	0	0	0	0	0	0
Time from discontinuation of previous line to initiation of second- or subsequent line of therapy, months
Mean (SD)	---	---	8.38	5.45	5.47	5.3	---	---	9.2	6.43	4.78	2.73	---	---	8.12	4.53	3.82	4.41	---	---	5.91	3.97	8.08	10.56	---	---	9.96	4.51	---	---	---	---	10.75	6.83	---	---	---	---	7.78	5	---	---	---	---	5.99	3.93	5.03
Median	---	---	6.88		4.77		---	---	6.93		5.02		---	---	7.3		3.82		---	---	6.12		3.43		---	---	7.53		---	---	---	---	9.23		---	---	---	---	6.37		---	---	---	---	3.97		5.03
IQR (Q1, Q3)	---	---	5.4	10.23	1.97	6.3	---	---	5.67	13.07	2.9	5.67	---	---	5.67	10.5	0.7	6.93	---	---	1.6	8.2	0.63	20.17	---	---	7.1	13.77	---	---	---	---	6.03	17.7	---	---	---	---	5.47	9.8	---	---	---	---	3.4	6.63	5.03	5.03
Min, Max	---	---	0.47	24.57	0.63	20.17	---	---	0.67	24.57	1.03	9.07	---	---	1	20.53	0.7	6.93	---	---	0.63	13.53	0.63	20.17	---	---	6.43	17.37	---	---	---	---	2.87	17.93	---	---	---	---	0.47	19.37	---	---	---	---	3.37	12.6	5.03	5.03
Total duration of therapy line, months
Mean (SD)	4.12	2.14	4.96	3.53	5.03	4.75	4.1	2.59	5.87	3.82	6.97	5.87	4.43	2.45	3.89	1.66	0		4.22	1.26	5.3	4.06	2.77	0.71	3.92	1.51	3.87	1.77	---	---	3.63	1.3	3.37	0.38	---	---	4.1	1.61	3.74	1.91	---	---	4.08	2.28	7.65	7.25	6.87
Median	3.77		4.5		3.48		3.75		5.32		5.12		4.9		4.12		0		3.68		4.92		2.77		3.95		4.4		---	---	3.6		3.57		---	---	4.33		3.67		---	---	5.43		4.23		6.87
IQR (Q1, Q3)	2.98	5.43	3.57	5.63	2.27	6.7	2.83	5.13	3.57	5.83	2.98	10.95	2.87	5.7	3.27	5.5	0	0	3.55	5.63	2.87	5.62	2.27	3.27	3.53	5.23	3.5	5.2	---	---	3.27	4.93	2.93	3.6	---	---	3.6	5.27	3.3	5.1	---	---	1.43	5.87	3.57	6.53	6.87	6.87
Min, Max	0	16.1	0.53	20.43	0	15.37	0	16.1	0.6	18.6	2.27	15.37	0.7	13.23	0.7	5.87	0	0	2.13	5.97	1.13	14.5	2.27	3.27	0.7	5.83	0.97	5.27	---	---	0.7	5.3	2.93	3.6	---	---	0.47	6.27	0.53	6.33	---	---	0	6.33	3.5	20.43	6.87	6.87
Time from initiation of line of therapy to disease progression, months
Mean (SD)	9.02	5.28	8.06	5.82	5.3	5.92	9.49	5.99	9.46	5.09	8.82	9.26	8.25	4.5	6.33	4.21	0.27		9.49	3.87	11.76	10.21	3.27		9.88	5.93	3.2	2.83	---	---	8.71	6.37	3.67		---	---	9.43	4.76	4.57	4.18	---	---	7.01	3.99	11.37	7.92	5.33
Median	9.47		7.97		3.27		9.87		9.58		8.82		9.7		6.37		0.27		9.85		11.37		3.27		10.38		3.2		---	---	8.83		3.67		---	---	9.45		3.6		---	---	7.77		7.83		5.33
IQR (Q1, Q3)	4.73	12	3.1	10.97	2.27	5.33	4.73	12.23	7.98	11.83	2.27	15.37	4.3	11.6	2.47	10.2	0.27	0.27	7.73	12.53	3.18	20.33	3.27	3.27	3.92	12.75	1.2	5.2	---	---	3.53	11.03	3.67	3.67	---	---	6.87	12.78	1	7.97	---	---	3.83	8.93	5.83	20.43	5.33	5.33
Min, Max	0.47	28.03	0.47	22.83	0.27	15.37	0.47	28.03	1.17	22.67	2.27	15.37	1.1	16.57	1.57	12.2	0.27	0.27	2.37	16	1.47	22.83	3.27	3.27	1.23	20.43	1.2	5.2	---	---	1.2	22.23	3.67	3.67	---	---	0.73	21.53	0.47	9.83	---	---	1	14.5	5.83	20.43	5.33	5.33
Total follow-up time among patients who died during the follow-up period, months (n,%)
n (%)	139	68.14	26	31.71	5	41.67	42	63.64	10	32.26	2	33.33	34	79.07	7	50	1	50	12	60	2	20	1	33.33	15	68.18	1	16.67	0		12	70.59	1	20	0		13	61.9	3	27.27	0		11	73.33	2	40	1	100
Mean (SD)	14.02	12.68	21.1	8.11	22.54	13.43	16.63	14.53	22.78	9.14	25.33	23.62	14.7	13.94	23.21	8.99	24.6		13.79	7.09	17.75	9.36	11.13		10.31	6.02	18.8		---	---	14.56	20.02	14.4		---	---	11.11	5.35	15.6	5.03	---	---	10.11	7.09	21.38	6.95	26.3
Median	11		19.23		24.6		12.7		20.38		25.33		11		24.2		24.6		11.13		17.75		11.13		11.83		18.8		---	---	9.97		14.4		---	---	11		14.83		---	---	9.83		21.38		26.3
IQR (Q1, Q3)	6.87	15.67	14.83	24.6	11.13	26.3	7.53	21	18.97	28	8.63	42.03	6.87	14.97	14.77	32.03	24.6	24.6	10.33	13.55	11.13	24.37	11.13	11.13	4.73	13.8	18.8	18.8	---	---	4.82	14.62	14.4	14.4	---	---	8.77	14.83	11	20.97	---	---	2.87	13.7	16.47	26.3	26.3	26.3
Min, Max	1.37	76.7	8.63	42.03	8.63	42.03	1.67	76.7	8.63	42.03	8.63	42.03	3.03	73.8	14.77	37.13	24.6	24.6	6.8	31.67	11.13	24.37	11.13	11.13	1.6	21.03	18.8	18.8	---	---	3.03	76.53	14.4	14.4	---	---	1.37	20.97	11	20.97	---	---	1.87	26.3	16.47	26.3	26.3	26.3
Total follow-up time among patients alive at the end of the follow-up period, months (n,%)
n (%)	54	26.47	52	63.41	7	58.33	22	33.33	21	67.74	4	66.67	7	16.28	7	50	1	50	7	35	7	70	2	66.67	4	18.18	4	66.67	0		4	23.53	4	80	0		7	33.33	7	63.64	0		3	20	2	40	0	0
Mean (SD)	27.93	14.29	29.39	13.53	29	4.66	30.18	14.34	30.25	13.12	27.32	5.45	31.77	24.14	35.65	26.37	28.6		30.93	14.92	30.93	14.92	32.57	1.98	20.37	8.74	24.62	3.39	---	---	22.29	10.7	26.7	4.81	---	---	26.22	4.67	26.22	4.67	---	---	23.42	4.11	24.67	3.99	---	---
Median	25.2		25.78		31.17		25.83		25.93		27.55		25.4		27.7		28.6		26.67		26.67		32.57		24.17		24.47		---	---	25.6		26.32		---	---	25.12		25.12		---	---	22.73		24.9		---	---
IQR (Q1, Q3)	21.9	29.87	23.15	30.28	23.8	32.6	22.2	30.95	23.8	30.6	22.68	31.95	21.07	28.6	23.1	28.63	28.6	28.6	23.92	32.57	23.92	32.57	31.17	33.97	16.67	25.9	24.17	25.9	---	---	21.27	27.03	23.43	29.97	---	---	21.82	31.48	21.82	31.48	---	---	20.12	26.72	20.57	28.53	---	---
Min, Max	2.8	95.1	15.83	95.1	21.57	33.97	9.13	68.97	21.57	68.97	21.57	32.6	15.33	95.1	21	95.1	28.6	28.6	15.83	65.33	15.83	65.33	31.17	33.97	2.8	28.97	19.6	28.97	---	---	4.67	32.9	21.27	32.9	---	---	21.2	31.73	21.2	31.73	---	---	19.67	28.53	20.57	28.53	---	---
Total follow-up time among ALL patients, months
Mean (SD)	18.45	14.69	26.76	12.64	26.31	9.41	21.56	15.78	27.84	12.35	26.66	11.42	18.27	17.69	29.43	20	26.6	2.83	20.65	13.61	28.3	14.62	25.42	12.45	13.51	8.31	23.65	3.85	---	---	16.84	17.82	24.24	6.9	---	---	16.86	9.02	23.32	6.7	---	---	13.66	8.75	23.35	4.82	26.3
Median	14.87		24.62		27.45		21.2		24.37		27.55		12.17		25		26.6		14.72		25.23		31.17		12.58		24.32		---	---	10.87		25.6		---	---	15.37		22.17		---	---	11		24.9		26.3
IQR (Q1, Q3)	8.97	24.62	21.27	28.97	22.68	31.95	9.47	28	21.9	30.5	21.57	32.6	7.6	24.2	21	28.63	24.6	28.6	10.98	26.67	23.2	31.17	11.13	33.97	4.83	19.6	19.6	25.9	---	---	5.27	21.27	21.27	27.03	---	---	10.1	22.17	20.97	31.3	---	---	7.8	20.57	20.57	26.3	26.3	26.3
Min, Max	1.37	95.1	8.63	95.1	8.63	42.03	1.67	76.7	8.63	68.97	8.63	42.03	3.03	95.1	14.77	95.1	24.6	28.6	6.8	65.33	11.13	65.33	11.13	33.97	1.6	28.97	18.8	28.97	---	---	3.03	76.53	14.4	32.9	---	---	1.37	31.73	11	31.73	---	---	1.87	28.53	16.47	28.53	26.3	26.3
Use of supportive/palliative medications during line of treatment
Pain control	106	51.96	47	57.32	7	58.33	35	53.03	15	48.39	4	66.67	26	60.47	11	78.57	1	50	10	50	5	50	1	33.33	10	45.45	4	66.67	0	---	6	35.29	0	0	0	---	9	42.86	8	72.73	0	---	10	66.67	4	80	1	100
Antiemetics	91	44.61	35	42.68	4	33.33	32	48.48	12	38.71	1	16.67	22	51.16	6	42.86	2	100	6	30	3	30	0	0	8	36.36	2	33.33	0	---	9	52.94	2	40	0	---	9	42.86	7	63.64	0	---	5	33.33	3	60	1	100
Antibiotics	27	13.24	9	10.98	1	8.33	6	9.09	2	6.45	1	16.67	7	16.28	4	28.57	0	0	2	10	0	0	0	0	1	4.55	1	16.67	0	---	2	11.76	1	20	0	---	3	14.29	1	9.09	0	---	6	40	0	0	0	0
Antifungals	10	4.9	1	1.22	0	0	3	4.55	1	3.23	0	0	2	4.65	0	0	0	0	0	0	0	0	0	0	1	4.55	0	0	0	---	2	11.76	0	0	0	---	1	4.76	0	0	0	---	1	6.67	0	0	0	0
Antivirals	2	0.98	0	0	0	0	0	0	0	0	0	0	1	2.33	0	0	0	0	0	0	0	0	0	0	0	0	0	0	0	---	0	0	0	0	0	---	0	0	0	0	0	---	1	6.67	0	0	0	0
Dexrazoxane	0	0	0	0	0	0	0	0	0	0	0	0	0	0	0	0	0	0	0	0	0	0	0	0	0	0	0	0	0	---	0	0	0	0	0	---	0	0	0	0	0	---	0	0	0	0	0	0
Transfusions	19	9.31	10	12.2	2	16.67	6	9.09	4	12.9	1	16.67	3	6.98	1	7.14	0	0	3	15	2	20	1	33.33	2	9.09	1	16.67	0	---	1	5.88	0	0	0	---	3	14.29	2	18.18	0	---	1	6.67	0	0	0	0
Antianxiety, antidepressant drugs	18	8.82	7	8.54	1	8.33	6	9.09	3	9.68	1	16.67	4	9.3	1	7.14	0	0	1	5	0	0	0	0	1	4.55	1	16.67	0	---	2	11.76	1	20	0	---	2	9.52	1	9.09	0	---	2	13.33	0	0	0	0
Growth factors	15	7.35	4	4.88	0	0	4	6.06	1	3.23	0	0	4	9.3	0	0	0	0	2	10	0	0	0	0	1	4.55	0	0	0	---	1	5.88	1	20	0	---	3	14.29	1	9.09	0	---	0	0	1	20	0	0
Bisphosphonates	4	1.96	1	1.22	0	0	1	1.52	0	0	0	0	2	4.65	0	0	0	0	0	0	0	0	0	0	0	0	0	0	0	---	0	0	0	0	0	---	0	0	0	0	0	---	1	6.67	1	20	0	0
Referral to psychiatrist, psychologist, or other professional for distress management	13	6.37	5	6.1	1	8.33	5	7.58	2	6.45	1	16.67	2	4.65	0	0	0	0	1	5	0	0	0	0	1	4.55	1	16.67	0	---	2	11.76	1	20	0	---	2	9.52	1	9.09	0	---	0	0	0	0	0	0
Oxygen	14	6.86	5	6.1	1	8.33	7	10.61	2	6.45	0	0	4	9.3	1	7.14	1	50	0	0	0	0	0	0	0	0	0	0	0	---	0	0	0	0	0	---	3	14.29	2	18.18	0	---	0	0	0	0	0	0
Radiation therapy, excluding utilization for pain control	3	1.47	0	0	0	0	1	1.52	0	0	0	0	0	0	0	0	0	0	2	10	0	0	0	0	0	0	0	0	0	---	0	0	0	0	0	---	0	0	0	0	0	---	0	0	0	0	0	0
Nutritional support	32	15.69	11	13.41	2	16.67	10	15.15	2	6.45	1	16.67	5	11.63	2	14.29	0	0	2	10	1	10	1	33.33	4	18.18	3	50	0	---	6	35.29	1	20	0	---	3	14.29	1	9.09	0	---	2	13.33	1	20	0	0
Corticosteroids, except for utilization for pain control	37	18.14	15	18.29	2	16.67	14	21.21	4	12.9	0	0	5	11.63	1	7.14	0	0	3	15	3	30	2	66.67	5	22.73	2	33.33	0	---	5	29.41	2	40	0	---	5	23.81	2	18.18	0	---	0	0	1	20	0	0
Patient did not receive any supportive care	40	19.61	17	20.73	2	16.67	12	18.18	8	25.81	1	16.67	6	13.95	2	14.29	0	0	6	30	4	40	1	33.33	6	27.27	1	16.67	0	---	5	29.41	2	40	0	---	3	14.29	0	0	0	---	2	13.33	0	0	0	0
Others	0	0	0	0	0	0	0	0	0	0	0	0	0	0	0	0	0	0	0	0	0	0	0	0	0	0	0	0	0	---	0	0	0	0	0	---	0	0	0	0	0	---	0	0	0	0	0	0
Don’t know	16	7.84	4	4.88	0	0	6	9.09	3	9.68	0	0	3	6.98	0	0	0	0	0	0	0	0	0	0	3	13.64	0	0	0	---	1	5.88	0	0	0	---	2	9.52	1	9.09	0	---	1	6.67	0	0	0	0
Treatment for pain control among those who received supportive/palliative care during line of treatment
Opiate analgesics	75	70.75	32	68.09	6	85.71	26	74.29	9	60	3	75	20	76.92	6	54.55	1	100	8	80	5	100	1	100	7	70	2	50	0	---	5	83.33	0	---	0	---	2	22.22	6	75	0	---	7	70	4	100	1	100
Other analgesics	63	59.43	23	48.94	4	57.14	20	57.14	7	46.67	3	75	13	50	6	54.55	0	0	7	70	2	40	1	100	7	70	3	75	0	---	4	66.67	0	---	0	---	8	88.89	4	50	0	---	4	40	1	25	0	0
Radiotherapy	10	9.43	3	6.38	2	28.57	2	5.71	1	6.67	1	25	2	7.69	0	0	0	0	2	20	1	20	1	100	0	0	0	0	0	---	0	0	0	---	0	---	2	22.22	1	12.5	0	---	2	20	0	0	0	0
Psychological intervention	2	1.89	1	2.13	0	0	1	2.86	1	6.67	0	0	0	0	0	0	0	0	1	10	0	0	0	0	0	0	0	0	0	---	0	0	0	---	0	---	0	0	0	0	0	---	0	0	0	0	0	0
Sedation for refractory pain	0	0	0	0	0	0	0	0	0	0	0	0	0	0	0	0	0	0	0	0	0	0	0	0	0	0	0	0	0	---	0	0	0	---	0	---	0	0	0	0	0	---	0	0	0	0	0	0
Epidural infusions	0	0	0	0	0	0	0	0	0	0	0	0	0	0	0	0	0	0	0	0	0	0	0	0	0	0	0	0	0	---	0	0	0	---	0	---	0	0	0	0	0	---	0	0	0	0	0	0
Splanchnic nerve block	0	0	0	0	0	0	0	0	0	0	0	0	0	0	0	0	0	0	0	0	0	0	0	0	0	0	0	0	0	---	0	0	0	---	0	---	0	0	0	0	0	---	0	0	0	0	0	0
Other treatment	0	0	0	0	0	0	0	0	0	0	0	0	0	0	0	0	0	0	0	0	0	0	0	0	0	0	0	0	0	---	0	0	0	---	0	---	0	0	0	0	0	---	0	0	0	0	0	0
Don’t know	0	0	0	0	0	0	0	0	0	0	0	0	0	0	0	0	0	0	0	0	0	0	0	0	0	0	0	0	0	---	0	0	0	---	0	---	0	0	0	0	0	---	0	0	0	0	0	0
Type of transfusions among those who received supportive/palliative care during line of treatment
Red blood cell transfusion	16	84.21	9	90	2	100	6	100	4	100	1	100	2	66.67	1	100	0	---	3	100	2	100	1	100	2	100	1	100	0	---	1	100	0	---	0	---	1	33.33	1	50	0	---	1	100	0	---	0	---
Platelet transfusion	3	15.79	1	10	0	0	0	0	0	0	0	0	1	33.33	0	0	0	---	0	0	0	0	0	0	0	0	0	0	0	---	0	0	0	---	0	---	2	66.67	1	50	0	---	0	0	0	---	0	---
Other transfusion typesl to be added based upon actual data	0	0	0	0	0	0	0	0	0	0	0	0	0	0	0	0	0	---	0	0	0	0	0	0	0	0	0	0	0	---	0	0	0	---	0	---	0	0	0	0	0	---	0	0	0	---	0	---
Don’t know	0	0	0	0	0	0	0	0	0	0	0	0	0	0	0	0	0	---	0	0	0	0	0	0	0	0	0	0	0	---	0	0	0	---	0	---	0	0	0	0	0	---	0	0	0	---	0	---
Diagnostic tests as part of supportive care during line of treatment
Computed tomography (CT) scan	178	87.25	65	79.27	8	66.67	56	84.85	22	70.97	4	66.67	39	90.7	12	85.71	2	100	15	75	8	80	2	66.67	21	95.45	5	83.33	0	---	14	82.35	3	60	0	---	20	95.24	11	100	0	---	13	86.67	4	80	0	0
Positron emission tomography (PET) scan (whole body)	19	9.31	7	8.54	2	16.67	8	12.12	2	6.45	1	16.67	4	9.3	1	7.14	0	0	3	15	1	10	1	33.33	1	4.55	1	16.67	0	---	2	11.76	1	20	0	---	1	4.76	1	9.09	0	---	0	0	0	0	0	0
GI endoscope	3	1.47	1	1.22	0	0	1	1.52	1	3.23	0	0	1	2.33	0	0	0	0	1	5	0	0	0	0	0	0	0	0	0	---	0	0	0	0	0	---	0	0	0	0	0	---	0	0	0	0	0	0
Magnetic Resonance Imaging (MRI)	31	15.2	7	8.54	1	8.33	11	16.67	2	6.45	1	16.67	3	6.98	1	7.14	0	0	2	10	1	10	0	0	6	27.27	0	0	0	---	3	17.65	2	40	0	---	3	14.29	1	9.09	0	---	3	20	0	0	0	0
Multi Gated Acquisition Scan (MUGA)	8	3.92	4	4.88	1	8.33	4	6.06	3	9.68	1	16.67	0	0	0	0	0	0	2	10	1	10	0	0	0	0	0	0	0	---	1	5.88	0	0	0	---	1	4.76	0	0	0	---	0	0	0	0	0	0
No diagnostic tests performed as part of their supportive care during this period	5	2.45	7	8.54	1	8.33	3	4.55	5	16.13	1	16.67	2	4.65	1	7.14	0	0	0	0	1	10	0	0	0	0	0	0	0	---	0	0	0	0	0	---	0	0	0	0	0	---	0	0	0	0	0	0
Don’t know	1	0.49	2	2.44	1	8.33	0	0	0	0	0	0	1	2.33	1	7.14	0	0	0	0	0	0	0	0	0	0	0	0	0	---	0	0	0	0	0	---	0	0	0	0	0	---	0	0	1	20	1	100
Best response during first-line (among second-line patients) according to RECIST
Complete response	5	6.09756
Partial response	43	52.439
Stable disesae (demonstrated by a scan at = 3 months)	24	29.2683
No response/progression of disease	10	12.1951
Don't know	0	0

## Sheet: Tx (France)
Table B-10. Treatment Characteristics of Advanced Soft Tissue Sarcoma by Line of Therapy: France
	Total						Leiomyosarcomas						Others / NOS						Fibroblastic/Myofibroblastic						Liposarcomas						Vascular sarcomas						Rhabdomyosarcomas						Synovial sarcoma
Characteristic	First line		Second line		Third line		First line		Second line		Third line		First line		Second line		Third line		First line		Second line		Third line		First line		Second line		Third line		First line		Second line		Third line		First line		Second line		Third line		First line		Second line		Third line
	N	%	N	%	N	%	N	%	N	%	N	%	N	%	N	%	N	%	N	%	N	%	N	%	N	%	N	%	N	%	N	%	N	%	N	%	N	%	N	%	N	%	N	%	N	%	N	%
Patients receiving nth-line therapy	201	100	108	100	46	100	57	100	35	100	16	100	65	100	37	100	15	100	16	100	10	100	5	100	25	100	15	100	7	100	21	100	6	100	3	100	12	100	2	100	0		5	100	3	100	0
Weight in Kg at start of therapy line (Known weight)	177	100	103	100	44	100	50	100	32	100	15	100	58	100	36	100	14	100	13	100	9	100	5	100	25	100	15	100	7	100	20	100	6	100	3	100	8	100	2	100	0		3	100	3	100	0
Mean (SD)	69.71	14.61	69.42	15.68	73.66	16.43	63.94	10.12	62.88	9.59	63.27	11.18	70.72	14.65	70.47	14.88	73.79	15.04	79.46	21.2	84.67	22.21	91.6	13.01	70.8	15.66	71.6	19.12	81.86	17.88	72.45	15.87	71.17	16.24	76	17.32	74.13	9.34	73	4.24			64.67	11.06	64	13.45
Median	68		68		70		61.5		63.5		61		70		70		72		79		82		87		70		70		80		75		73.5		86		71		73				66		68
IQR (Q1, Q3)	60	77	57	77	60	86	57	70	55.5	69.5	54	68	60	77	59.5	77.5	67	75	64	89	71	98	80	105	62	75	59	81	66	99	58.5	82	57	85	56	86	69	76.5	70	76			53	75	49	75
(min, max)	42	118	42	119	49	110	50	95	48	89	49	91	42	116	49	112	50	110	50	118	48	119	80	106	48	108	42	107	59	106	48	110	48	90	56	86	65	95	70	76			53	75	49	75
Body surface area at start of therapy line (Known BSA)	167	100	99	100	43	100	47	100	31	100	15	100	52	100	34	100	14	100	12	100	8	100	4	100	25	100	15	100	7	100	20	100	6	100	3	100	8	100	2	100	0		3	100	3	100	0
Mean (SD)	1.8	0.21	1.79	0.22	1.86	0.22	1.72	0.15	1.7	0.15	1.72	0.16	1.82	0.21	1.81	0.22	1.87	0.22	1.91	0.27	1.96	0.29	2.08	0.13	1.83	0.23	1.83	0.28	1.99	0.23	1.83	0.23	1.82	0.21	1.87	0.23	1.89	0.14	1.88	0.11			1.74	0.19	1.73	0.22
Median	1.79		1.77		1.83		1.69		1.71		1.66		1.82		1.82		1.84		1.95		1.99		2.07		1.83		1.81		1.97		1.9		1.89		1.97		1.85		1.88				1.74		1.77
IQR (Q1, Q3)	1.64	1.93	1.62	1.94	1.66	1.99	1.6	1.82	1.58	1.79	1.59	1.83	1.67	1.91	1.66	1.91	1.79	1.91	1.7	2.12	1.8	2.21	1.97	2.18	1.71	1.94	1.66	2.04	1.77	2.22	1.64	2	1.62	2.01	1.6	2.02	1.82	1.94	1.8	1.96			1.55	1.93	1.49	1.93
(min, max)	1.38	2.46	1.34	2.42	1.48	2.4	1.45	2.07	1.45	2.07	1.5	2.09	1.38	2.46	1.45	2.42	1.48	2.4	1.46	2.33	1.43	2.28	1.96	2.23	1.47	2.25	1.34	2.23	1.65	2.22	1.47	2.35	1.52	2.02	1.6	2.02	1.73	2.18	1.8	1.96			1.55	1.93	1.49	1.93
Performance Status at start of therapy line
Performance Status measured on the ECOG scale
Mean (SD)	1.41	0.74	1.44	0.69	1.54	0.66	1.35	0.67	1.29	0.67	1.31	0.6	1.42	0.85	1.59	0.69	1.67	0.62	1.25	0.77	1.1	0.74	1.4	1.14	1.48	0.65	1.73	0.59	1.86	0.38	1.67	0.58	1.33	0.52	1.67	0.58	1.33	0.78	1	1.41			1.2	0.84	1.33	0.58
Median	1		2		2		1		1		1		2		2		2		1		1		1		2		2		2		2		1		2		1.5		1				1		1
IQR (Q1, Q3)	1	2	1	2	1	2	1	2	1	2	1	2	1	2	1	2	1	2	1	2	1	2	1	2	1	2	2	2	2	2	1	2	1	2	1	2	1	2	0	2			1	2	1	2
(min, max)	0	4	0	3	0	3	0	3	0	2	0	2	0	4	0	3	0	2	0	2	0	2	0	3	0	2	0	2	1	2	1	3	1	2	1	2	0	2	0	2			0	2	1	2
Distribution
0=Fully active, able to carry on all pre-disease performance without restriction	23	11.44	11	10.19	3	6.52	4	7.02	4	11.43	1	6.25	11	16.92	3	8.11	1	6.67	3	18.75	2	20	1	20	2	8	1	6.67	0	0	0	0	0	0	0	0	2	16.67	1	50	0		1	20	0	0	0
1=Restricted in physically strenuous activity but ambulatory	79	39.3	40	37.04	16	34.78	31	54.39	17	48.57	9	56.25	19	29.23	10	27.03	3	20	6	37.5	5	50	2	40	9	36	2	13.33	1	14.29	8	38.1	4	66.67	1	33.33	4	33.33	0	0	0		2	40	2	66.67	0
2=Ambulatory and capable of all self-care but unable to carry out any work	94	46.77	56	51.85	26	56.52	20	35.09	14	40	6	37.5	33	50.77	23	62.16	11	73.33	7	43.75	3	30	1	20	14	56	12	80	6	85.71	12	57.14	2	33.33	2	66.67	6	50	1	50	0		2	40	1	33.33	0
3=Capable of only limited self-care, confined to bed or chair more than 50% of waking hours	4	1.99	1	0.93	1	2.17	2	3.51	0	0	0	0	1	1.54	1	2.7	0	0	0	0	0	0	1	20	0	0	0	0	0	0	1	4.76	0	0	0	0	0	0	0	0	0		0	0	0	0	0
4=Completely disabled. Cannot carry on any self-care. Totally confined to bed or chair	1	0.5	0	0	0	0	0	0	0	0	0	0	1	1.54	0	0	0	0	0	0	0	0	0	0	0	0	0	0	0	0	0	0	0	0	0	0	0	0	0	0	0		0	0	0	0	0
Dont know
Use of cancer-directed treatments during therapy line
Overall
Chemotherapy	194	96.5174	89	82.4074	36	78.2609	56	98.2456	27	77.1429	14	87.5	63	96.9231	29	78.3784	13	86.6667	15	93.75	10	100	1	20	24	96	14	93.3333	6	85.7143	20	95.2381	5	83.3333	2	66.6667	12	100	2	100	0		4	80	2	66.6667	0
Biologic therapy	0	0	0	0	0	0	0	0	0	0	0	0	0	0	0	0	0	0	0	0	0	0	0	0	0	0	0	0	0	0	0	0	0	0	0	0	0	0	0	0	0		0	0	0	0	0
Targeted therapy	8	3.9801	21	19.4444	10	21.7391	2	3.50877	9	25.7143	2	12.5	2	3.07692	8	21.6216	2	13.3333	1	6.25	0	0	4	80	1	4	1	6.66667	1	14.2857	1	4.7619	2	33.3333	1	33.3333	0	0	0	0	0		1	20	1	33.3333	0
Single class of agents
Chemotherapy only	193	96.0199	87	80.5556	36	78.2609	55	96.4912	26	74.2857	14	87.5	63	96.9231	29	78.3784	13	86.6667	15	93.75	10	100	1	20	24	96	14	93.3333	6	85.7143	20	95.2381	4	66.6667	2	66.6667	12	100	2	100	0		4	80	2	66.6667	0
Biologic therapy only	0	0	0	0	0	0	0	0	0	0	0	0	0	0	0	0	0	0	0	0	0	0	0	0	0	0	0	0	0	0	0	0	0	0	0	0	0	0	0	0	0		0	0	0	0	0
Targeted therapy only	7	3.48259	19	17.5926	10	21.7391	1	1.75439	8	22.8571	2	12.5	2	3.07692	8	21.6216	2	13.3333	1	6.25	0	0	4	80	1	4	1	6.66667	1	14.2857	1	4.7619	1	16.6667	1	33.3333	0	0	0	0	0		1	20	1	33.3333	0
Combination of classes of agents
Chemotherapy + biologic therapy	0	0	0	0	0	0	0	0	0	0	0	0	0	0	0	0	0	0	0	0	0	0	0	0	0	0	0	0	0	0	0	0	0	0	0	0	0	0	0	0	0		0	0	0	0	0
Chemotherapy + targeted therapy	1	0.497512	2	1.85185	0	0	1	1.75439	1	2.85714	0	0	0	0	0	0	0	0	0	0	0	0	0	0	0	0	0	0	0	0	0	0	1	16.6667	0	0	0	0	0	0	0		0	0	0	0	0
Biologic therapy + targeted therapy	0	0	0	0	0	0	0	0	0	0	0	0	0	0	0	0	0	0	0	0	0	0	0	0	0	0	0	0	0	0	0	0	0	0	0	0	0	0	0	0	0		0	0	0	0	0
Chemotherapy + biologic therapy + targeted therapy	0	0	0	0	0	0	0	0	0	0	0	0	0	0	0	0	0	0	0	0	0	0	0	0	0	0	0	0	0	0	0	0	0	0	0	0	0	0	0	0	0		0	0	0	0	0
Use of selected chemotherapies during therapy line
Bevacizumab	0	0	0	0	0	0	0	0	0	0	0	0	0	0	0	0	0	0	0	0	0	0	0	0	0	0	0	0	0	0	0	0	0	0	0	0	0	0	0	0	0		0	0	0	0	0
Carboplatin	4	1.99	4	3.7	0	0	1	1.75	1	2.86	0	0	2	3.08	1	2.7	0	0	0	0	0	0	0	0	0	0	0	0	0	0	1	4.76	1	16.67	0	0	0	0	1	50	0		0	0	0	0	0
Cisplatin	7	3.48	3	2.78	1	2.17	1	1.75	0	0	0	0	2	3.08	3	8.11	0	0	0	0	0	0	0	0	1	4	0	0	0	0	0	0	0	0	1	33.33	3	25	0	0	0		0	0	0	0	0
Crizotinib	0	0	0	0	0	0	0	0	0	0	0	0	0	0	0	0	0	0	0	0	0	0	0	0	0	0	0	0	0	0	0	0	0	0	0	0	0	0	0	0	0		0	0	0	0	0
Cyclophosphamide	4	1.99	3	2.78	1	2.17	1	1.75	1	2.86	0	0	2	3.08	1	2.7	1	6.67	0	0	0	0	0	0	1	4	1	6.67	0	0	0	0	0	0	0	0	0	0	0	0	0		0	0	0	0	0
Dacarbazine	8	3.98	6	5.56	2	4.35	3	5.26	1	2.86	0	0	3	4.62	3	8.11	1	6.67	1	6.25	0	0	0	0	1	4	2	13.33	1	14.29	0	0	0	0	0	0	0	0	0	0	0		0	0	0	0	0
Dactinomycin	0	0	2	1.85	0	0	0	0	0	0	0	0	0	0	1	2.7	0	0	0	0	1	10	0	0	0	0	0	0	0	0	0	0	0	0	0	0	0	0	0	0	0		0	0	0	0	0
Docetaxel	7	3.48	15	13.89	2	4.35	6	10.53	9	25.71	1	6.25	1	1.54	2	5.41	0	0	0	0	4	40	0	0	0	0	0	0	1	14.29	0	0	0	0	0	0	0	0	0	0	0		0	0	0	0	0
Doxorubicin	123	61.19	8	7.41	0	0	34	59.65	3	8.57	0	0	46	70.77	2	5.41	0	0	7	43.75	1	10	0	0	20	80	1	6.67	0	0	8	38.1	1	16.67	0	0	5	41.67	0	0	0		3	60	0	0	0
Epirubicin	18	8.96	0	0	0	0	3	5.26	0	0	0	0	6	9.23	0	0	0	0	4	25	0	0	0	0	0	0	0	0	0	0	1	4.76	0	0	0	0	3	25	0	0	0		1	20	0	0	0
Etoposide	4	1.99	4	3.7	2	4.35	1	1.75	1	2.86	0	0	3	4.62	2	5.41	1	6.67	0	0	0	0	0	0	0	0	0	0	1	14.29	0	0	0	0	0	0	0	0	1	50	0		0	0	0	0	0
Everolimus	2	1	3	2.78	0	0	1	1.75	0	0	0	0	1	1.54	2	5.41	0	0	0	0	0	0	0	0	0	0	0	0	0	0	0	0	1	16.67	0	0	0	0	0	0	0		0	0	0	0	0
Gemcitabine	13	6.47	27	25	11	23.91	8	14.04	11	31.43	5	31.25	2	3.08	7	18.92	3	20	2	12.5	4	40	1	20	0	0	5	33.33	2	28.57	0	0	0	0	0	0	1	8.33	0	0	0		0	0	0	0	0
Ifosfamide	85	42.29	18	16.67	0	0	22	38.6	2	5.71	0	0	38	58.46	9	24.32	0	0	7	43.75	1	10	0	0	6	24	3	20	0	0	5	23.81	0	0	0	0	6	50	1	50	0		1	20	2	66.67	0
Imatinib	1	0.5	1	0.93	0	0	0	0	1	2.86	0	0	1	1.54	0	0	0	0	0	0	0	0	0	0	0	0	0	0	0	0	0	0	0	0	0	0	0	0	0	0	0		0	0	0	0	0
Interferon	0	0	0	0	0	0	0	0	0	0	0	0	0	0	0	0	0	0	0	0	0	0	0	0	0	0	0	0	0	0	0	0	0	0	0	0	0	0	0	0	0		0	0	0	0	0
Melphalan	0	0	0	0	0	0	0	0	0	0	0	0	0	0	0	0	0	0	0	0	0	0	0	0	0	0	0	0	0	0	0	0	0	0	0	0	0	0	0	0	0		0	0	0	0	0
Methotrexate	0	0	0	0	0	0	0	0	0	0	0	0	0	0	0	0	0	0	0	0	0	0	0	0	0	0	0	0	0	0	0	0	0	0	0	0	0	0	0	0	0		0	0	0	0	0
Paclitaxel	13	6.47	6	5.56	2	4.35	1	1.75	2	5.71	1	6.25	1	1.54	1	2.7	1	6.67	0	0	0	0	0	0	1	4	0	0	0	0	10	47.62	3	50	0	0	0	0	0	0	0		0	0	0	0	0
Pazopanib	4	1.99	16	14.81	10	21.74	1	1.75	8	22.86	2	12.5	0	0	6	16.22	2	13.33	1	6.25	0	0	4	80	1	4	1	6.67	1	14.29	0	0	0	0	1	33.33	0	0	0	0	0		1	20	1	33.33	0
Sirolimus	0	0	0	0	0	0	0	0	0	0	0	0	0	0	0	0	0	0	0	0	0	0	0	0	0	0	0	0	0	0	0	0	0	0	0	0	0	0	0	0	0		0	0	0	0	0
Sorafenib	0	0	0	0	0	0	0	0	0	0	0	0	0	0	0	0	0	0	0	0	0	0	0	0	0	0	0	0	0	0	0	0	0	0	0	0	0	0	0	0	0		0	0	0	0	0
Sulindac	0	0	0	0	0	0	0	0	0	0	0	0	0	0	0	0	0	0	0	0	0	0	0	0	0	0	0	0	0	0	0	0	0	0	0	0	0	0	0	0	0		0	0	0	0	0
Sunitinib	1	0.5	1	0.93	0	0	0	0	0	0	0	0	0	0	0	0	0	0	0	0	0	0	0	0	0	0	0	0	0	0	1	4.76	1	16.67	0	0	0	0	0	0	0		0	0	0	0	0
Tamoxifen	0	0	0	0	0	0	0	0	0	0	0	0	0	0	0	0	0	0	0	0	0	0	0	0	0	0	0	0	0	0	0	0	0	0	0	0	0	0	0	0	0		0	0	0	0	0
Temozolomide	1	0.5	0	0	0	0	0	0	0	0	0	0	0	0	0	0	0	0	1	6.25	0	0	0	0	0	0	0	0	0	0	0	0	0	0	0	0	0	0	0	0	0		0	0	0	0	0
TNF-alpha	0	0	0	0	0	0	0	0	0	0	0	0	0	0	0	0	0	0	0	0	0	0	0	0	0	0	0	0	0	0	0	0	0	0	0	0	0	0	0	0	0		0	0	0	0	0
Topotecan	0	0	0	0	0	0	0	0	0	0	0	0	0	0	0	0	0	0	0	0	0	0	0	0	0	0	0	0	0	0	0	0	0	0	0	0	0	0	0	0	0		0	0	0	0	0
Toremifene	0	0	0	0	0	0	0	0	0	0	0	0	0	0	0	0	0	0	0	0	0	0	0	0	0	0	0	0	0	0	0	0	0	0	0	0	0	0	0	0	0		0	0	0	0	0
Trabectedin	11	5.47	20	18.52	18	39.13	8	14.04	6	17.14	8	50	0	0	6	16.22	7	46.67	1	6.25	3	30	0	0	1	4	5	33.33	2	28.57	0	0	0	0	1	33.33	1	8.33	0	0	0		0	0	0	0	0
Vinblastine	1	0.5	0	0	0	0	0	0	0	0	0	0	1	1.54	0	0	0	0	0	0	0	0	0	0	0	0	0	0	0	0	0	0	0	0	0	0	0	0	0	0	0		0	0	0	0	0
Vincristine	1	0.5	0	0	0	0	0	0	0	0	0	0	1	1.54	0	0	0	0	0	0	0	0	0	0	0	0	0	0	0	0	0	0	0	0	0	0	0	0	0	0	0		0	0	0	0	0
Vinorelbine	0	0	1	0.93	0	0	0	0	0	0	0	0	0	0	1	2.7	0	0	0	0	0	0	0	0	0	0	0	0	0	0	0	0	0	0	0	0	0	0	0	0	0		0	0	0	0	0
Pegylated Liposomal Doxorubicin	3	1.49	1	0.93	0	0	1	1.75	1	2.86	0	0	1	1.54	0	0	0	0	0	0	0	0	0	0	1	4	0	0	0	0	0	0	0	0	0	0	0	0	0	0	0		0	0	0	0	0
Regorafenib	0	0	1	0.93	1	2.17	0	0	1	2.86	0	0	0	0	0	0	0	0	0	0	0	0	0	0	0	0	0	0	1	14.29	0	0	0	0	0	0	0	0	0	0	0		0	0	0	0	0
Following current ESMO treatment guidelines during first-line
Number of cycles during therapy lined (Known number of cycles)	187	100	104	100	43	100	50	100	33	100	15	100	63	100	35	100	14	100	14	100	10	100	5	100	25	100	15	100	7	100	21	100	6	100	2	100	9	100	2	100	0	100	5	100	3	100	0	100
Mean (SD)	5.63	2.98	5.89	3.73	5.07	3.03	6.1	3.55	6.42	4.21	5.07	3.24	5.06	1.8	5.74	2.34	5.36	2.79	7.29	5.72	6.1	2.6	5.8	4.15	5.28	2.51	4.8	2.81	4.71	2.75	5.33	2.69	7.83	9.28	2.5	2.12	5.44	1.24	5	1.41			6.8	1.79	3.33	0.58
Median	6		6		5		6		6		6		6		6		5		6		5.5		5		6		4		3		6		4		2.5		6		5				6		3
IQR (Q1, Q3)	4	6	4	6	3	7	6	6	4	7	2	9	4	6	4	7	3	6	5	6	5	6	3	9	3	6	3	6	3	7	3	6	3	9	1	4	5	6	4	6			6	6	3	4
(min, max)	1	28	1	26	1	13	2	28	1	24	1	10	1	9	1	12	2	13	3	24	3	12	1	11	3	14	1	12	3	10	1	13	1	26	1	4	3	7	4	6			6	10	3	4
Distribution
1	6	3.21	5	4.81	5	11.63	0	0	1	3.03	3	20	5	7.94	2	5.71	0	0	0	0	0	0	1	20	0	0	1	6.67	0	0	1	4.76	1	16.67	1	50	0	0	0	0	0		0	0	0	0	0
2	4	2.14	3	2.88	3	6.98	1	2	2	6.06	2	13.33	2	3.17	1	2.86	1	7.14	0	0	0	0	0	0	0	0	0	0	0	0	1	4.76	0	0	0	0	0	0	0	0	0		0	0	0	0	0
3	28	14.97	16	15.38	9	20.93	6	12	2	6.06	1	6.67	5	7.94	4	11.43	3	21.43	2	14.29	1	10	1	20	9	36	6	40	4	57.14	5	23.81	1	16.67	0	0	1	11.11	0	0	0		0	0	2	66.67	0
4	13	6.95	14	13.46	4	9.3	2	4	5	15.15	0	0	7	11.11	2	5.71	2	14.29	1	7.14	1	10	0	0	1	4	2	13.33	1	14.29	1	4.76	2	33.33	1	50	1	11.11	1	50	0		0	0	1	33.33	0
5	14	7.49	7	6.73	4	9.3	3	6	3	9.09	1	6.67	5	7.94	1	2.86	2	14.29	2	14.29	3	30	1	20	2	8	0	0	0	0	1	4.76	0	0	0	0	1	11.11	0	0	0		0	0	0	0	0
6	104	55.61	35	33.65	7	16.28	34	68	11	33.33	4	26.67	36	57.14	16	45.71	3	21.43	7	50	3	30	0	0	10	40	4	26.67	0	0	8	38.1	0	0	0	0	5	55.56	1	50	0		4	80	0	0	0
7+	18	9.63	24	23.08	11	25.58	4	8	9	27.27	4	26.67	3	4.76	9	25.71	3	21.43	2	14.29	2	20	2	40	3	12	2	13.33	2	28.57	4	19.05	2	33.33	0	0	1	11.11	0	0	0		1	20	0	0	0
Best response according to RECIST
Complete response	20	9.95	1	0.93	0	0	6	10.53	0	0	0	0	5	7.69	0	0	0	0	3	18.75	0	0	0	0	3	12	0	0	0	0	2	9.52	0	0	0	0	1	8.33	1	50	0		0	0	0	0	0
Partial response	71	35.32	32	29.63	7	15.22	26	45.61	13	37.14	4	25	24	36.92	10	27.03	1	6.67	5	31.25	4	40	1	20	3	12	4	26.67	1	14.29	6	28.57	0	0	0	0	4	33.33	1	50	0		3	60	0	0	0
Stable disesae (demonstrated by a scan at = 3 months)	46	22.89	38	35.19	18	39.13	14	24.56	11	31.43	4	25	12	18.46	15	40.54	7	46.67	4	25	4	40	3	60	8	32	3	20	2	28.57	4	19.05	3	50	2	66.67	4	33.33	0	0	0		0	0	2	66.67	0
No response/progression of disease	62	30.85	33	30.56	16	34.78	11	19.3	10	28.57	5	31.25	23	35.38	9	24.32	5	33.33	4	25	2	20	1	20	11	44	8	53.33	4	57.14	8	38.1	3	50	1	33.33	3	25	0	0	0		2	40	1	33.33	0
Dont know	2	1	4	3.7	5	10.87	0	0	1	2.86	3	18.75	1	1.54	3	8.11	2	13.33	0	0	0	0	0	0	0	0	0	0	0	0	1	4.76	0	0	0	0	0	0	0	0	0		0	0	0	0	0
Reason for discontinuation of treatment regimen
Adverse event	4	1.99	5	4.63	0	0	0	0	2	5.71	0	0	2	3.08	1	2.7	0	0	0	0	0	0	0	0	0	0	1	6.67	0	0	2	9.52	0	0	0	0	0	0	0	0	0		0	0	1	33.33	0
Patient decision	5	2.49	4	3.7	0	0	0	0	1	2.86	0	0	2	3.08	3	8.11	0	0	0	0	0	0	0	0	0	0	0	0	0	0	1	4.76	0	0	0	0	1	8.33	0	0	0		1	20	0	0	0
Progressive disease	85	42.29	61	56.48	28	60.87	25	43.86	21	60	10	62.5	24	36.92	18	48.65	9	60	6	37.5	5	50	2	40	14	56	10	66.67	5	71.43	10	47.62	6	100	2	66.67	5	41.67	0	0	0		1	20	1	33.33	0
Completion of planned course of treatment	93	46.27	22	20.37	2	4.35	25	43.86	5	14.29	0	0	35	53.85	9	24.32	1	6.67	7	43.75	4	40	0	0	11	44	3	20	1	14.29	7	33.33	0	0	0	0	6	50	1	50	0		2	40	0	0	0
Death	6	2.99	2	1.85	2	4.35	0	0	0	0	0	0	3	4.62	2	5.41	2	13.33	1	6.25	0	0	0	0	1	4	0	0	0	0	1	4.76	0	0	0	0	0	0	0	0	0		0	0	0	0	0
Loss to follow-up	9	4.48	17	15.74	14	30.43	6	10.53	7	20	6	37.5	0	0	5	13.51	3	20	2	12.5	1	10	3	60	0	0	1	6.67	1	14.29	0	0	0	0	1	33.33	1	8.33	1	50	0		0	0	2	66.67	0
Other	2	1	0	0	0	0	1	1.75	0	0	0	0	1	1.54	0	0	0	0	0	0	0	0	0	0	0	0	0	0	0	0	0	0	0	0	0	0	0	0	0	0	0		0	0	0	0	0
Don't know	2	1	0	0	0	0	0	0	0	0	0	0	1	1.54	0	0	0	0	0	0	0	0	0	0	0	0	0	0	0	0	0	0	0	0	0	0	0	0	0	0	0		1	20	0	0	0
Time from discontinuation of previous line to initiation of second- or subsequent line of therapy, months
Mean (SD)			5.61	6.77	2.95	4.61			5.11	5.5	3.36	6.57			5.95	5.97	2.67	3.52			10.35	13.57	3.33	4.35			4.13	5.3	3.1	2.73			0.95	0.71	1.19	0.08			5.53	2.92					8.2	7.38
Median			3.03		0.97				2.43		0.72				3.8		0.8				6.63		1				0.93		1.67				0.68		1.2				5.53						7.6
IQR (Q1, Q3)			0.73	8.1	0.7	3.37			0.73	8.87	0.68	1.53			1.03	8.23	0.43	3.37			0.8	14.43	0.7	3.6			0.73	5.77	0.93	6.57			0.63	0.9	1.1	1.27			3.47	7.6					1.13	15.87
Min, Max			0	45.2	0	22.17			0	18.2	0.23	22.17			0	19.83	0	13.3			0.53	45.2	0.57	10.8			0.43	18.83	0.7	7.13			0.43	2.37	1.1	1.27			3.47	7.6					1.13	15.87
Total duration of therapy line, months
Mean (SD)	5.06	2.96	4.83	3.6	4.32	2.98	5.56	3.43	5.02	3.08	3.89	2.84	4.65	2.79	4.64	2.71	5.43	3.17	5.06	2.74	4.91	2.75	3.02	3.61	4.24	2.68	3.94	2.5	4.17	2.82	4.95	2.93	7.04	9.87	1.55	2.19	6.08	1.99	6.77				7.6	2.18	2.17
Median	4.55		4.2		3.7		4.93		4.42		4.47		4.2		4.4		4.8		4.88		3.87		3.02		3.5		3.1		3.23		5.37		3.37		1.55		5.63		6.77				7.07		2.17
IQR (Q1, Q3)	3.42	6.28	2.83	6.17	2.37	5.72	3.7	6.3	3.02	6.57	1.63	5.83	3.23	6.2	2.83	6.2	3.42	6.87	2.73	6.27	3.03	5.43	0.47	5.57	2.8	4.9	2.4	5.37	2.37	4.33	2.6	7	2.13	6.07	0	3.1	4.67	7.53	6.77	6.77			6.7	9.57	2.17	2.17
Min, Max	0.03	20.7	0	26.83	0	12.8	0.7	20.7	0.47	13.1	0	8.63	0.03	14.13	0	11.63	0.7	12.8	1.4	11.17	2.87	11.67	0.47	5.57	1.63	13.73	0.23	10.37	2.17	9.7	0.07	10.73	0.47	26.83	0	3.1	3.47	10.63	6.77	6.77			4.7	9.97	2.17	2.17
Time from initiation of line of therapy to disease progression, months
Mean (SD)	8.01	7.22	5.41	5.16	4.35	2.86	8.54	6.99	5.63	6.07	4.19	2.83	7.41	6.13	5.02	3.39	5.06	3.25	11.25	12.31	6.19	5.02	2.88	2.62	8.13	8.12	4.33	3.83	4.19	2.45	5.03	3.16	6.75	10.02	3.89	3.52	6.37	4.65	14.47				11.78	7.27	2.17
Median	6.22		3.73		3.95		6.47		4.43		4.48		6.13		4.5		4.13		7.97		5.87		2.2		5.7		3		3.5		6.07		3.25		3.3		5.2		14.47				8.57		2.17
IQR (Q1, Q3)	3.3	10.6	2.12	7.5	2.2	6.33	4.13	10.97	1.6	7.33	1.4	6.33	3.27	10.73	1.97	8.03	3.58	6.87	5.23	15.63	3.2	6.87	0.67	5.77	3	9.63	2.4	5.9	2.67	4.97	2.23	7.27	2.33	3.7	0.7	7.67	3.73	9.08	14.47	14.47			7.07	16.47	2.17	2.17
Min, Max	0	51.07	0	28.67	0.27	12.33	0	39.13	0	28.67	0.33	9	0	24.7	0	11.2	0.27	12.33	1.17	51.07	0	16.23	0.67	5.77	1.77	37.1	0	11.3	1.87	8.63	0.43	11.27	0.87	27.1	0.7	7.67	0	14.93	14.47	14.47			4.7	22.1	2.17	2.17
Total follow-up time among patients who died during the follow-up period, months (n,%)
n (%)	116	57.71	51	47.22	17	36.96	21	36.84	12	34.29	4	25	43	66.15	18	48.65	5	33.33	8	50	5	50	2	40	19	76	10	66.67	4	57.14	16	76.19	5	83.33	2	66.67	6	50	0	0	0		3	60	1	33.33	0
Mean (SD)	23.41	22.86	29.98	23.47	36.88	25.77	21.04	19.92	22.99	18.89	24.56	12.34	26.15	27.69	34.67	30.26	50.99	38.85	27.29	16.01	29.45	15.05	39.37	20.32	21.52	17.36	29.09	19.2	40.05	20.07	17.36	15.73	26.43	22	17.4	9.81	10.78	5.74					59.69	36.89	58.83
Median	16.02		22.63		25		13.73		18.38		21.25		17.33		21.3		45.17		25.63		25		39.37		13.97		22.05		44.02		11.55		24.33		17.4		9.65						58.83		58.83
IQR (Q1, Q3)	7.95	28.82	13.73	42	18.67	53.73	7.7	25.73	9.23	26.98	16.2	32.92	5.93	32.4	17.1	45.17	23.43	65.67	17.7	37.87	19.57	33.13	25	53.73	9.93	31.87	13.4	52.87	23.67	56.43	4.55	23.25	10.47	32.73	10.47	24.33	6.07	14.13					23.23	97	58.83	58.83
Min, Max	0.83	109.6	2.1	109.6	10.47	109.6	3.77	73.07	6.17	73.07	13.73	42	0.83	109.6	2.1	109.6	11.07	109.6	2.2	53.73	15.83	53.73	25	53.73	2.17	56.7	9.8	56.7	15.47	56.7	2.83	60.3	4.3	60.3	10.47	24.33	4.93	20.27					23.23	97	58.83	58.83
Total follow-up time among patients alive at the end of the follow-up period, months (n,%)
n (%)	85	42.29	57	52.78	29	63.04	36	63.16	23	65.71	12	75	22	33.85	19	51.35	10	66.67	8	50	5	50	3	60	6	24	5	33.33	3	42.86	5	23.81	1	16.67	1	33.33	6	50	2	100	0		2	40	2	66.67	0
Mean (SD)	37.82	23.59	39.99	26.45	44.21	26.77	36.38	24.08	37.84	26.59	37.89	26.64	41.6	26.59	43.1	27.94	55.14	31.31	36.17	15.25	38.43	19.59	47.63	21.18	48.79	32.61	48.66	36.45	36.93	9.71	28.15	11.52	22.27		22.27		36.82	20.41	43.1	33.47			23.27	4.01	23.27	4.01
Median	26.87		26.67		32.83		25.08		25.07		24.97		27.42		27.73		38.85		30.48		26.93		46.7		42.5		41.33		41.33		22.27		22.27		22.27		33.15		43.1				23.27		23.27
IQR (Q1, Q3)	21.67	43.67	23.77	43.63	25.2	50.03	21.2	42.82	21.2	43.33	22.48	46.68	24.73	49.5	24.73	71.37	27.73	84.47	26.3	41.47	25.67	46.7	26.93	69.27	25.8	49.47	25.8	43.67	25.8	43.67	19.4	36.37	22.27	22.27	22.27	22.27	19.43	50.43	19.43	66.77			20.43	26.1	20.43	26.1
Min, Max	17.97	116.83	19.13	116.83	19.93	108.83	18.9	116.83	19.93	116.83	19.93	108.83	19.13	107.03	19.13	107.03	25.47	107.03	23.57	69.27	23.57	69.27	26.93	69.27	21	111.5	21	111.5	25.8	43.67	18.5	44.23	22.27	22.27	22.27	22.27	17.97	66.77	19.43	66.77			20.43	26.1	20.43	26.1
Total follow-up time among ALL patients, months
Mean (SD)	29.5	24.19	35.27	25.47	41.5	26.36	30.73	23.66	32.75	24.98	34.56	24.21	31.38	28.1	39	29	53.76	32.65	31.73	15.79	33.94	17.14	44.33	18.66	28.06	24.27	35.61	26.6	38.71	15.35	19.93	15.31	25.73	19.75	19.02	7.48	23.8	19.73	43.1	33.47			45.12	32.9	35.12	20.73
Median	23.43		25.13		29.8		23.8		24		24.28		24.07		26.67		42.3		28.08		26.3		46.7		21		25.8		41.33		18.5		23.3		22.27		18.7		43.1				26.1		26.1
IQR (Q1, Q3)	12.67	39.3	19.77	43.48	23.8	53.73	18.93	39.97	20.03	42	20.77	42.67	10.2	39.73	19.17	45.17	26.67	84.47	24.28	39.42	23.57	46.7	26.93	53.73	10.83	41.33	15.47	52.87	25.8	56.17	10.07	24.33	10.47	32.73	10.47	24.33	9.65	33.15	19.43	66.77			23.23	58.83	20.43	58.83
Min, Max	0.83	116.83	2.1	116.83	10.47	109.6	3.77	116.83	6.17	116.83	13.73	108.83	0.83	109.6	2.1	109.6	11.07	109.6	2.2	69.27	15.83	69.27	25	69.27	2.17	111.5	9.8	111.5	15.47	56.7	2.83	60.3	4.3	60.3	10.47	24.33	4.93	66.77	19.43	66.77			20.43	97	20.43	58.83
Use of supportive/palliative medications during line of treatment
Pain control	72	35.82	42	38.89	21	45.65	11	19.3	10	28.57	7	43.75	25	38.46	14	37.84	6	40	8	50	5	50	2	40	9	36	8	53.33	5	71.43	9	42.86	2	33.33	1	33.33	7	58.33	1	50	0		3	60	2	66.67	0
Antiemetics	133	66.17	74	68.52	23	50	39	68.42	23	65.71	6	37.5	39	60	25	67.57	9	60	12	75	9	90	2	40	21	84	12	80	5	71.43	13	61.9	4	66.67	1	33.33	7	58.33	1	50	0		2	40	0	0	0
Antibiotics	20	9.95	10	9.26	5	10.87	7	12.28	5	14.29	0	0	8	12.31	0	0	2	13.33	2	12.5	2	20	1	20	2	8	2	13.33	2	28.57	1	4.76	0	0	0	0	0	0	0	0	0		0	0	1	33.33	0
Antifungals	7	3.48	4	3.7	0	0	2	3.51	1	2.86	0	0	4	6.15	0	0	0	0	0	0	1	10	0	0	1	4	1	6.67	0	0	0	0	1	16.67	0	0	0	0	0	0	0		0	0	0	0	0
Antivirals	0	0	0	0	0	0	0	0	0	0	0	0	0	0	0	0	0	0	0	0	0	0	0	0	0	0	0	0	0	0	0	0	0	0	0	0	0	0	0	0	0		0	0	0	0	0
Dexrazoxane	3	1.49	0	0	0	0	0	0	0	0	0	0	1	1.54	0	0	0	0	1	6.25	0	0	0	0	0	0	0	0	0	0	0	0	0	0	0	0	0	0	0	0	0		1	20	0	0	0
Transfusions	14	6.97	11	10.19	6	13.04	6	10.53	0	0	2	12.5	3	4.62	2	5.41	2	13.33	1	6.25	3	30	0	0	0	0	2	13.33	2	28.57	2	9.52	1	16.67	0	0	0	0	1	50	0		2	40	2	66.67	0
Antianxiety, antidepressant drugs	24	11.94	13	12.04	5	10.87	7	12.28	3	8.57	1	6.25	6	9.23	4	10.81	2	13.33	2	12.5	1	10	0	0	3	12	2	13.33	2	28.57	1	4.76	0	0	0	0	3	25	1	50	0		2	40	2	66.67	0
Growth factors	79	39.3	37	34.26	14	30.43	23	40.35	9	25.71	8	50	31	47.69	12	32.43	2	13.33	6	37.5	6	60	1	20	10	40	6	40	2	28.57	4	19.05	1	16.67	1	33.33	3	25	1	50	0		2	40	2	66.67	0
Bisphosphonates	9	4.48	3	2.78	1	2.17	1	1.75	1	2.86	1	6.25	2	3.08	0	0	0	0	1	6.25	1	10	0	0	0	0	0	0	0	0	3	14.29	0	0	0	0	1	8.33	0	0	0		1	20	1	33.33	0
Referral to psychiatrist, psychologist, or other professional for distress management	12	5.97	10	9.26	2	4.35	3	5.26	3	8.57	0	0	2	3.08	2	5.41	1	6.67	1	6.25	1	10	0	0	5	20	3	20	1	14.29	0	0	0	0	0	0	1	8.33	0	0	0		0	0	1	33.33	0
Oxygen	14	6.97	5	4.63	3	6.52	2	3.51	1	2.86	0	0	6	9.23	1	2.7	0	0	2	12.5	1	10	1	20	0	0	2	13.33	2	28.57	3	14.29	0	0	0	0	1	8.33	0	0	0		0	0	0	0	0
Radiation therapy, excluding utilization for pain control	6	2.99	2	1.85	0	0	0	0	0	0	0	0	3	4.62	1	2.7	0	0	1	6.25	0	0	0	0	1	4	1	6.67	0	0	0	0	0	0	0	0	0	0	0	0	0		1	20	0	0	0
Nutritional support	31	15.42	13	12.04	3	6.52	11	19.3	4	11.43	1	6.25	6	9.23	3	8.11	0	0	2	12.5	2	20	0	0	4	16	2	13.33	2	28.57	3	14.29	0	0	0	0	3	25	1	50	0		2	40	1	33.33	0
Corticosteroids, except for utilization for pain control	67	33.33	35	32.41	9	19.57	23	40.35	9	25.71	5	31.25	17	26.15	9	24.32	2	13.33	6	37.5	4	40	1	20	7	28	7	46.67	0	0	7	33.33	3	50	1	33.33	4	33.33	1	50	0		3	60	2	66.67	0
Patient did not receive any supportive care	25	12.44	17	15.74	10	21.74	8	14.04	6	17.14	2	12.5	9	13.85	6	16.22	3	20	1	6.25	1	10	3	60	2	8	1	6.67	0	0	3	14.29	1	16.67	2	66.67	1	8.33	1	50	0		1	20	1	33.33	0
Others	1	0.5	0	0	0	0	0	0	0	0	0	0	1	1.54	0	0	0	0	0	0	0	0	0	0	0	0	0	0	0	0	0	0	0	0	0	0	0	0	0	0	0		0	0	0	0	0
Don’t know	11	5.47	1	0.93	0	0	7	12.28	1	2.86	0	0	2	3.08	0	0	0	0	1	6.25	0	0	0	0	0	0	0	0	0	0	0	0	0	0	0	0	1	8.33	0	0	0		0	0	0	0	0
Treatment for pain control among those who received supportive/palliative care during line of treatment
Opiate analgesics	59	81.94	34	80.95	18	85.71	8	72.73	7	70	5	71.43	23	92	12	85.71	5	83.33	6	75	3	60	2	100	8	88.89	7	87.5	5	100	5	55.56	2	100	1	100	6	85.71	1	100	0		3	100	2	100	0
Other analgesics	30	41.67	17	40.48	7	33.33	7	63.64	5	50	3	42.86	11	44	6	42.86	1	16.67	2	25	3	60	1	50	3	33.33	2	25	1	20	6	66.67	0	0	1	100	1	14.29	0	0	0		0	0	1	50	0
Radiotherapy	3	4.17	3	7.14	1	4.76	0	0	1	10	0	0	1	4	0	0	0	0	1	12.5	1	20	0	0	0	0	0	0	0	0	0	0	1	50	1	100	1	14.29	0	0	0		0	0	0	0	0
Psychological intervention	7	9.72	4	9.52	0	0	2	18.18	1	10	0	0	3	12	1	7.14	0	0	1	12.5	0	0	0	0	0	0	0	0	0	0	0	0	1	50	0	0	1	14.29	0	0	0		0	0	1	50	0
Sedation for refractory pain	8	11.11	1	2.38	1	4.76	2	18.18	0	0	0	0	2	8	1	7.14	0	0	1	12.5	0	0	0	0	0	0	0	0	1	20	0	0	0	0	0	0	3	42.86	0	0	0		0	0	0	0	0
Epidural infusions	0	0	1	2.38	0	0	0	0	0	0	0	0	0	0	1	7.14	0	0	0	0	0	0	0	0	0	0	0	0	0	0	0	0	0	0	0	0	0	0	0	0	0		0	0	0	0	0
Splanchnic nerve block	0	0	1	2.38	0	0	0	0	0	0	0	0	0	0	1	7.14	0	0	0	0	0	0	0	0	0	0	0	0	0	0	0	0	0	0	0	0	0	0	0	0	0		0	0	0	0	0
Other treatment	0	0	0	0	0	0	0	0	0	0	0	0	0	0	0	0	0	0	0	0	0	0	0	0	0	0	0	0	0	0	0	0	0	0	0	0	0	0	0	0	0		0	0	0	0	0
Don’t know	1	1.39	1	2.38	0	0	0	0	1	10	0	0	0	0	0	0	0	0	1	12.5	0	0	0	0	0	0	0	0	0	0	0	0	0	0	0	0	0	0	0	0	0		0	0	0	0	0
Type of transfusions among those who received supportive/palliative care during line of treatment
Red blood cell transfusion	13	92.86	11	100	6	100	6	100	0		2	100	3	100	2	100	2	100	1	100	3	100	0		0		2	100	2	100	2	100	1	100	0		0		1	100	0		1	50	2	100	0
Platelet transfusion	2	14.29	1	9.09	0	0	2	33.33	0		0	0	0	0	1	50	0	0	0	0	0	0	0		0		0	0	0	0	0	0	0	0	0		0		0	0	0		0	0	0	0	0
Other transfusion typesl to be added based upon actual data	0	0	0	0	0	0	0	0	0		0	0	0	0	0	0	0	0	0	0	0	0	0		0		0	0	0	0	0	0	0	0	0		0		0	0	0		0	0	0	0	0
Don’t know	1	7.14	0	0	0	0	0	0	0		0	0	0	0	0	0	0	0	0	0	0	0	0		0		0	0	0	0	0	0	0	0	0		0		0	0	0		1	50	0	0	0
Diagnostic tests as part of supportive care during line of treatment
Computed tomography (CT) scan	165	82.09	89	82.41	41	89.13	50	87.72	30	85.71	13	81.25	50	76.92	30	81.08	14	93.33	12	75	9	90	5	100	22	88	13	86.67	7	100	16	76.19	3	50	2	66.67	11	91.67	1	50	0		4	80	3	100	0
Positron emission tomography (PET) scan (whole body)	25	12.44	9	8.33	7	15.22	11	19.3	5	14.29	4	25	6	9.23	2	5.41	1	6.67	3	18.75	1	10	1	20	0	0	0	0	0	0	2	9.52	1	16.67	1	33.33	3	25	0	0	0		0	0	0	0	0
GI endoscope	0	0	0	0	0	0	0	0	0	0	0	0	0	0	0	0	0	0	0	0	0	0	0	0	0	0	0	0	0	0	0	0	0	0	0	0	0	0	0	0	0		0	0	0	0	0
Magnetic Resonance Imaging (MRI)	32	15.92	10	9.26	1	2.17	8	14.04	2	5.71	0	0	13	20	7	18.92	1	6.67	4	25	0	0	0	0	1	4	1	6.67	0	0	0	0	0	0	0	0	5	41.67	0	0	0		1	20	0	0	0
Multi Gated Acquisition Scan (MUGA)	3	1.49	1	0.93	0	0	0	0	0	0	0	0	0	0	1	2.7	0	0	0	0	0	0	0	0	0	0	0	0	0	0	2	9.52	0	0	0	0	1	8.33	0	0	0		0	0	0	0	0
No diagnostic tests performed as part of their supportive care during this period	28	13.93	16	14.81	5	10.87	6	10.53	3	8.57	3	18.75	12	18.46	6	16.22	1	6.67	2	12.5	1	10	0	0	3	12	2	13.33	0	0	4	19.05	3	50	1	33.33	0	0	1	50	0		1	20	0	0	0
Don’t know	2	1	1	0.93	0	0	0	0	1	2.86	0	0	2	3.08	0	0	0	0	0	0	0	0	0	0	0	0	0	0	0	0	0	0	0	0	0	0	0	0	0	0	0		0	0	0	0	0
